# Supplementary material for: Single-Dose Synthetic Psilocybin With Psychotherapy for Treatment-Resistant Bipolar Type II Major Depressive Episodes: A Nonrandomized Open-Label Trial
Source: PubMed Central journal article supplement — JAMA Psychiatry. 2023 Dec 6;81(6):555–62. doi: 10.1001/jamapsychiatry.2023.4685 (PMC10701666; doi:10.1001/jamapsychiatry.2023.4685), 2023-12-06

## Supplemental Online Content

Aaronson ST, van der Vaart A, Miller T, et al. Single-dose synthetic psilocybin with psychotherapy for treatment-resistant bipolar type II major depressive episodes: a nonrandomized controlled trial. *JAMA Psychiatry*. Published online December 6, 2023. doi:10.1001/jamapsychiatry.2023.4685

**eTable 1.** Participant Medication History and MADRS Outcomes

**eTable 2.** Correlations Across 5 Dimensions of the 5D-ASC, and with Endpoint MADRS

**eFigure.** Consort Diagram

This supplemental material has been provided by the authors to give readers additional information about their work.

| ID | AD/AP trials | Mood stabilizer trials | ECT/TMS/ketamine | Total Tx Failures | Medication regimen – weaned prior to treatment             | Medications restarted                                                                | Baseline MADRS | Week 3 MADRS | Endpoint MADRS |
|----|--------------|------------------------|------------------|-------------------|------------------------------------------------------------|--------------------------------------------------------------------------------------|----------------|--------------|----------------|
| 1  | 2            | 1                      | --               | 3                 | 1 mood stabilizer                                          | 1 mood stabilizer (Week 4)                                                           | 33             | 7            | --             |
| 2  | 3            | 1                      | --               | 4                 | 1 antidepressant<br>1 mood stabilizer<br>1 psychostimulant | 1 psychostimulant (Week 5)<br>1 mood stabilizer (Week 5)                             | 33             | 7            | 2              |
| 3  | 1            | 1                      | --               | 2                 | 1 mood stabilizer<br>1 anxiolytic                          | --                                                                                   | 36             | 6            | 1              |
| 4  | 3            |                        | TMS              | 4                 | 1 antidepressant                                           | 1 antidepressant (Week 3)                                                            | 31             | 19           | 9              |
| 7  | 4            | 2                      | --               | 6                 | 1 antipsychotic<br>1 mood stabilizer                       | 1 antipsychotic (Week 8)<br>1 mood stabilizer (Week 8)                               | 31             | 8            | 5              |
| 8  | 3            |                        | --               | 3                 | 1 psychostimulant<br>1 anxiolytic                          | --                                                                                   | 31             | 2            | 2              |
| 9  | 3            | 2                      | --               | 5                 | 1 mood stabilizer<br>1 antidepressant                      | --                                                                                   | 35             | 3            | 0              |
| 10 |              | 2                      | --               | 2                 | 2 mood stabilizers<br>1 neuropathic pain medication        | --                                                                                   | 31             | 5            | 1              |
| 11 | 3            | 1                      | ketamine         | 5                 | 1 antidepressant<br>1 mood stabilizer<br>1 antipsychotic   | 1 antipsychotic (Week 2)<br>1 antidepressant (Week 4)<br>1 mood stabilizer (Week 11) | 28             | 18           | 22             |
| 13 | 3            | 1                      | --               | 4                 | 1 mood stabilizer<br>1 psychostimulant                     | --                                                                                   | 39             | 6            | 2              |
| 14 | 2            | 1                      | --               | 3                 | 1 antidepressant<br>1 mood stabilizer                      | 1 antidepressant (Week 7)<br>1 mood stabilizer (Week 7)                              | 22             | 16           | 0              |
| 15 | 5            | 1                      | --               | 6                 | 1 antidepressant                                           | --                                                                                   | 33             | 0            | 0              |
| 16 | 3            | 1                      | ECT              | 5                 | 1 antidepressant<br>1 psychostimulant                      | --                                                                                   | 38             | 1            | 6              |
| 18 | 5            |                        | --               | 5                 | 1 antidepressant<br>1 herbal supplement                    | --                                                                                   | 19             | 0            | 0              |
| 19 | 5            | 2                      | --               | 7                 | 1 antidepressant<br>1 mood stabilizer<br>1 antipsychotic   | --                                                                                   | 32             | 14           | 18             |

**eTable 1. Medications and MADRS Outcomes.** Participants treated in this study are listed by ID number. Number of prior medication trials in the antidepressant/antipsychotic (AD/AP) classes trialed prior to psilocybin are given in column 2. Total mood stabilizer (lamotrigine, lithium, divalproex) trials are shown in column 3. Only trials of sufficient time are included; historical medications which caused adverse reactions limiting duration to <5 weeks are not included. Column 4 indicates whether alternative interventions (ECT/TMS/ketamine) have been trialed. Column 5 summates all prior failed trials. Column 6 shows the regimen of medications by class at study start, weaned prior to treatment. Column 7 indicates which if any of these medications were restarted during the study period. Columns 8-10 list MADRS scores at baseline, week 3, and week 12 (endpoint) for reference.

|                                    |                     | OB        | AED    | VR        | AA      | RV     | Week 12 MADRS |
|------------------------------------|---------------------|-----------|--------|-----------|---------|--------|---------------|
| Oceanic Boundlessness (OB)         | Pearson Correlation | 1         | .725** | .933**    | .889**  | .794** | -.658**       |
|                                    | Sig. (2-tailed)     |           | 0.002  | 0.0000004 | 0.00001 | 0.0004 | 0.008         |
|                                    | N                   | 15        | 15     | 15        | 15      | 15     | 15            |
| Anxious Ego Dissolution (AED)      | Pearson Correlation | .725**    | 1      | .650**    | .681**  | .816** | -.550*        |
|                                    | Sig. (2-tailed)     | 0.002     |        | 0.009     | 0.005   | 0.0002 | 0.033         |
|                                    | N                   | 15        | 15     | 15        | 15      | 15     | 15            |
| Visionary Restructuralization (VR) | Pearson Correlation | .933**    | .650** | 1         | .780**  | .753** | -.789**       |
|                                    | Sig. (2-tailed)     | 0.0000004 | 0.009  |           | 0.001   | 0.001  | 0.000         |
|                                    | N                   | 15        | 15     | 15        | 15      | 15     | 15            |
| Auditory Alterations (AA)          | Pearson Correlation | .889**    | .681** | .780**    | 1       | .788** | -0.505        |
|                                    | Sig. (2-tailed)     | 0.00001   | 0.005  | 0.001     |         | 0.0005 | 0.055         |
|                                    | N                   | 15        | 15     | 15        | 15      | 15     | 15            |
| Reduction of Vigilance (RV)        | Pearson Correlation | .794**    | .816** | .753**    | .788**  | 1      | -.587*        |
|                                    | Sig. (2-tailed)     | 0.0004    | 0.0002 | 0.001     | 0.0005  |        | 0.022         |
|                                    | N                   | 15        | 15     | 15        | 15      | 15     | 15            |

\*\* . Correlation is significant at the 0.01 level (2-tailed).

\* . Correlation is significant at the 0.01 level (2-tailed).

**eTable 2. Correlations Across 5 Dimensions of the 5D-ASC, and with Endpoint MADRS.** The 5 dimensional subscales of the 5D-ASC show a high degree of inter-dimensional concordance. Each dimension also shows substantial degree ( $r < -0.5$ ) of correlation with endpoint (Week 12) MADRS, reaching significance at  $p < 0.05$  for 4 dimensions (Oceanic Boundlessness - OB, Anxious Ego Dissolution - AED, Visionary Restructuralization - VR, Reduction of Vigilance - RV).

eFigure. Consort Diagram

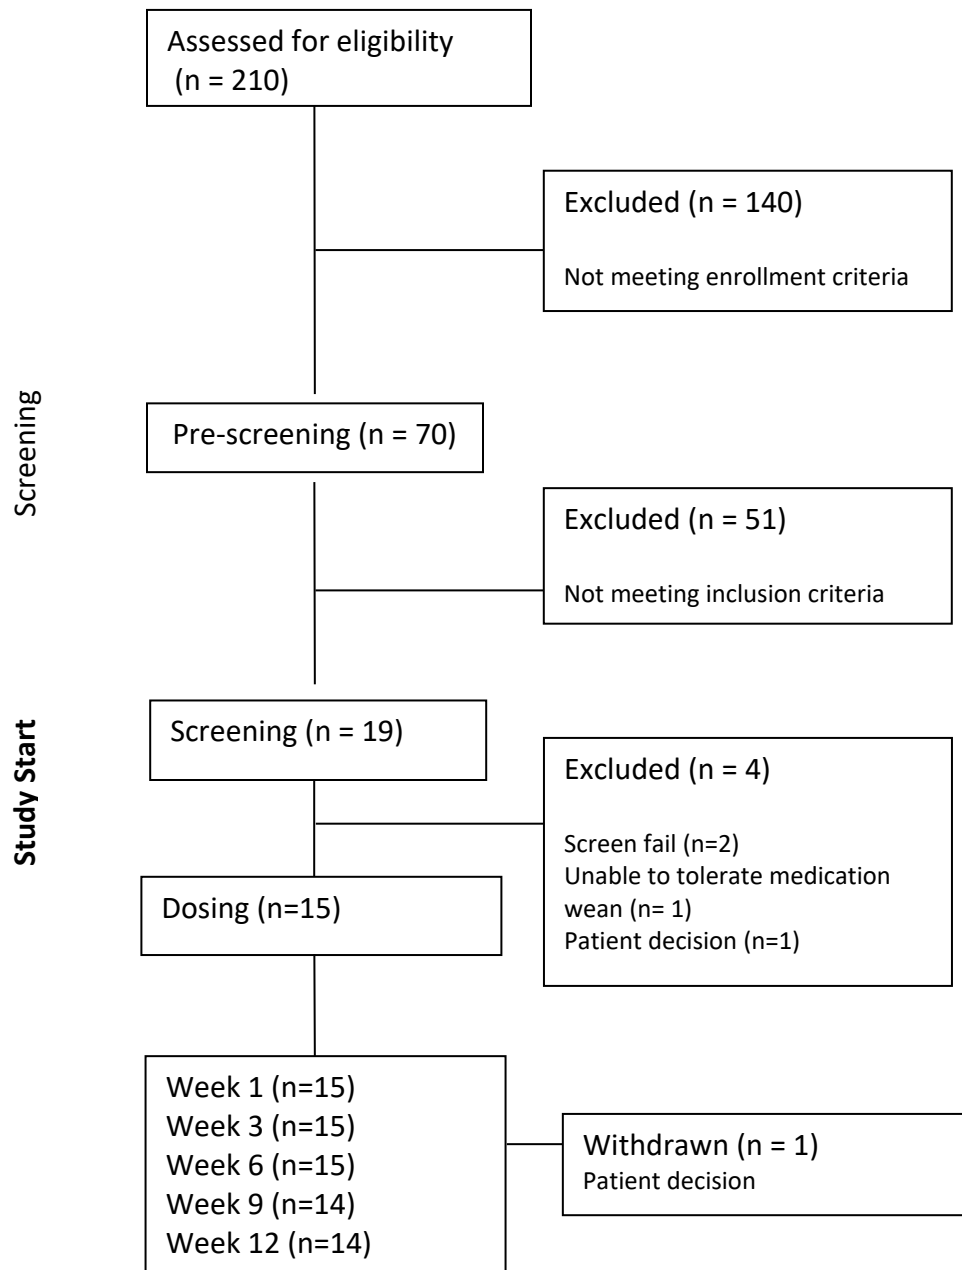

Supplement: jamapsychiatry-e234685-s002.pdf [file jamapsychiatry-e234685-s002.pdf]
