# Supplementary material for: Single-Dose Synthetic Psilocybin With Psychotherapy for Treatment-Resistant Bipolar Type II Major Depressive Episodes: A Nonrandomized Open-Label Trial
Source: PubMed Central journal article supplement — JAMA Psychiatry. 2023 Dec 6;81(6):555–62. doi: 10.1001/jamapsychiatry.2023.4685 (PMC10701666; doi:10.1001/jamapsychiatry.2023.4685), 2023-12-06
Supplement: jamapsychiatry-e234685-s001.pdf [file jamapsychiatry-e234685-s001.pdf]

1  
2  
3  
4  
5  
6  
7  
8  
9  
10  
11  
12  
13  
14  
15  
16  
17  
18  
19  
20  
21  
22  
23  
24  
25  
26  
27  
28  
29  
30  
31  
32  
33  
34  
35  
36  
37  
38  
39  
40  
41  
42  
43  
44  
45  
46  
47

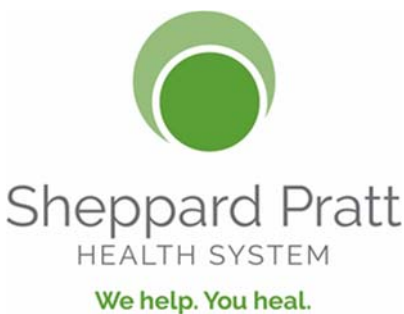

**THE SAFETY AND EFFICACY OF PSILOCYBIN IN PARTICIPANTS WITH TYPE 2 BIPOLAR DISORDER (BP-II) DEPRESSION**

**IND:** 137882  
**DRUG:** Psilocybin  
3-[2-(Dimethylamino)ethyl]-1*H*-indol-4-yl dihydrogen phosphate

**Principal Investigators:** Scott Aaronson, MD  
Sheppard Pratt Health System

**Sponsor:** COMPASS Pathways, Ltd. has provided a grant to Sheppard Pratt for this investigator initiated study.  
Investigational Product provided by COMPASS Pathways, Ltd.

**ORIGINAL PROTOCOL DATE:** June 21, 2019

**VERSION NUMBER:** V6

**VERSION DATE:** July 28, 2022

48  
49  
50

## STUDY SUMMARY

**Title:** The Safety and Efficacy of Psilocybin in Participants with Type 2 Bipolar Disorder (BP-II), Depression

**Rationale:** A recent open-label study of the effects of psilocybin in participants with treatment-resistant depression (TRD) showed rapid significant decrease of depressive symptoms after treatment with psilocybin coupled with psychological support. Over 40% of participants sustained response at 3 months. In this study, the aim is to assess effectiveness of 25 mg of psilocybin in patients with treatment-resistant type 2 bipolar depression

**Target** BP-II, current episode depressed

**Population:**

**Number of** 12 participants

**Participants:**

**Objectives:** The main purpose of this study is to determine the effect of Psilocybin at 25 mg. The intent of the primary analysis is to demonstrate efficacy of one therapeutic dose of 25 mg of psilocybin.

51  
52  
53  
54  
55  
56  
57  
58  
59  
60  
61  
62  
63  
64  
65  
66  
67  
68  
69  
70  
71  
72  
73  
74  
75  
76  
77  
78  
79  
80  
81  
82  
83  
84  
85

The primary objective of this study is to evaluate the efficacy of 25 mg of psilocybin under supportive conditions to adult participants with BP-II, current episode depressed, in improving depressive symptoms, as assessed by the change in the Montgomery-Asberg Depression Rating Scale (MADRS). Baseline is defined as the assessment score obtained on Day -1. The primary timepoint is Week 3; this variable will be analyzed for the change from Baseline to Day 1, and Weeks 6, 9, and 12.

The secondary objectives are:

- To assess the efficacy of psilocybin at 25mg in this population:
  - Proportion of participants with response defined as a  $\geq 50\%$  decrease in MADRS total score from Baseline to Week 3. This will also be assessed at Day 1 and at Weeks 1, 6, 9, and 12.
  - Proportion of participants in remission defined as the participants with a MADRS total score  $\leq 10$  at Week 3. This will also be assessed at Day 1 and at Weeks 1, 6, 9, and 12.
  - Proportion of responding participants who sustained a response up to Week 12 defined as those with  $\geq 50\%$  decrease in MADRS total score on or before Week 6 and remaining at Week 12.
- To evaluate the safety and tolerability of psilocybin in participants with BP-II, current episode depressed, based on tracking treatment emergent mania or hypomania as assessed by the Young Mania Rating Scale (YMRS), adverse events (AEs), changes in vital signs, and suicidal ideation/behavior (measured using the Columbia-Suicide Severity Rating Scale [C-SSRS]) score at all visits.

The exploratory objectives are:

- To evaluate the effects of psilocybin on quality of life and wellbeing, functioning and associated disability, cognitive function, and anxiety:

87  
88  
89  
90  
91  
~~92~~  
~~93~~  
94  
95  
~~96~~  
~~97~~  
98  
99  
100  
~~101~~  
102  
103  
104  
~~105~~  
~~106~~  
107  
108  
~~109~~  
~~110~~  
~~111~~  
112  
113  
114  
115  
~~116~~  
~~118~~

- Quality of Life Enjoyment and Satisfaction Questionnaire Short Form (Q-LES-Q-SF) scale score change from Baseline to Week 3. This will also be assessed at Week 12.
  - Functioning and associated disability in the Sheehan Disability Scale (SDS) score change from Baseline to Week 3. This will be also assessed at Week 12.
  - Level of anxiety as measured using the change in Generalized Anxiety Disorder 7 item Scale (GAD-7) total score change from Baseline to Week 3. This will also be assessed at Week 12.
  - Participant determined level of depression as measured using the change in Quick Inventory of Depressive Symptomatology Self Rated (QIDS-SR-16) total score from Baseline to Week 3. This will also be assessed at Day 1, and Weeks 1, 2, 6, 9, and 12.
  - Psychosocial functioning and predictor of response durability as measured using the change in Work and Social Adjustment Scale (WSAS) from Baseline to Week 3. This will also be assessed at Week 12.
  - The Positive and Negative Affect Schedule, Five Dimension Altered States of Consciousness questionnaire, and the Scale to Assess Therapeutic Relationship (Clinician and Patient version, respectively) will be assessed for correlation with the primary and secondary outcomes as possible predictors of response.
-

119  
120  
121  
122  
123  
124  
125  
126  
127  
128  
129  
130  
131  
132  
133  
134  
135  
136  
137  
138  
139  
140  
141  
142  
143  
144  
145  
146  
147  
148  
149  
150  
151  
152  
153  
154  
155  
156  
157  
158  
159  
160  
161  
162  
163  
164  
165  
166  
167  
168  
169  
170  
171  
172  
173  
174  
175  
176  
177  
178  
179

**Study Design:** This is a single center, open label, fixed-dose trial. The study population will include adult men and women, 18 to 65 years of age, with BP-II, current episode depressed.

Participants with BP-II are defined as those who meet the Diagnostic and Statistical Manual of Mental Disorders (5<sup>th</sup> Edition; DSM-5) diagnostic criteria for recurrent episodes of depression and hypomania without psychotic features which have failed to respond to an adequate dose and duration of  $\geq 2$  pharmacological treatments for the current episode. Failure includes inadequate response to an adequate duration and dose or failure to reach an adequate dose and duration due to lack of tolerance. Augmentation counts as a second treatment.

Participants will be recruited primarily through the Sheppard Pratt Health System website and clinicaltrials.gov.

The majority of participants will have no prior exposure to psilocybin or so-called magic mushrooms. If the subject has a past exposure to psilocybin it has to be more than 12 months prior to Screening and not during the current depressive episode. .

After signing the informed consent form (ICF), participants will be assessed for their eligibility with the Mini International Neuropsychiatric Interview (MINI), the Hamilton Depression Rating Scale (HAM-D-17), the Massachusetts General Hospital-Antidepressant Treatment Response Questionnaire (MGH-ATRQ), the Young Mania Rating Scale (YMRS) and the Columbia-Suicide Severity Rating Scale (C-SSRS). Those who meet the eligibility criteria will enter the screening period, which will last between 3 and 6 weeks. At the initial Screening visit (V1), the participant will also be evaluated with the QIDS-SR-16. Additionally, a medical history, an electrocardiogram (ECG), blood tests, and vital signs will be obtained. The participant will meet with the therapist on V1 to begin the psycho-education and preparation for the psilocybin experience.

During the screening period, participants who are on serotonergic medications will be expected to complete the taper at least 2 weeks prior to Baseline (V2). Participants will be given a choice of the tapering rate. During the tapering period all participants will be supported by the study clinician. The designated study nurse or coordinator will be in frequent contact with the participants to monitor for withdrawal and worsening of mood disorder symptoms. Participants will be assessed for suicidality with the C-SSRS and for emerging hypomania with the YMRS at each contact/visit.

Participants discontinuing serotonergic medication will be evaluated for safety at the clinic weekly for a minimum of 3 weeks prior to psilocybin administration to ensure safe discontinuation of current antidepressant therapy required by the protocol. Participants' family members and/or caregivers will be educated about the signs of worsening of depression and suicidality, and instructed on ways to contact the study team in case of significant worsening of depression. Any safety assessment visits during the screening period will be called V1a, V1b, etc. During these visits, the C-SSRS and any changes in medications since the previous visit will be obtained in addition to other assessments at the study clinician's discretion.

The day before psilocybin session, the participants will undergo a baseline assessment (3 to 6 weeks after initial Screening [V1] + 7 day window) that will consist of the HAM-D-17, MADRS, QIDS-SR-16, YMRS, C-SSRS, SDS, GAD-7, Q-LES-Q-SF, WSAS, vital signs, urinalysis, urine drug screen, and urine pregnancy test (only for women of childbearing potential). Also, all participants will have a psychoeducation session with their therapist to discuss what to expect during the

---

180

181  
182  
183  
184  
185  
186  
187  
188  
189  
190  
191  
192  
193  
194  
195  
196  
197  
198  
199  
200  
201  
202  
203  
204  
205  
206  
207  
208  
209  
210  
211  
212  
213  
214  
215  
216  
217  
218  
219  
220  
221  
222  
223  
224  
225  
226  
227

**Eligibility  
Criteria:**

228  
229 psilocybin session. The therapist and a participant will review psychoeducational  
230 materials provided at the timetable of enrollment.  
231  
232 The psilocybin administration session (V3, Day 0) will last approximately 6 hours  
233 and will be supported by a trained therapist. A full description of the activities of the  
234 psilocybin administration session is found in the Study Manual. After the acute  
235 effects of the psilocybin pass, participants will be evaluated for safety and discharged  
236 home with a friend or a family member On Day 1 (V4), the day following psilocybin  
237 administration, participants will be seen in person for a safety check, assessment of  
238 suicidality, and to discuss their experience during the psilocybin session with the  
239 study therapist. **Participants are allowed to share insights that may arise during**  
240 **psilocybin experience.** All sessions between the therapist and the participant may be  
241 audio recorded for adherence monitoring and quality assurance. Audio and video  
242 recording of the sessions are subject to participant consent. Participants who do not  
243 consent to either or all recordings will not be excluded from the study. Participants  
244 will be asked to participate in integration sessions with the therapist on V4, V5, and  
245 V7 and a final check in on V10.  
246  
247 All participants will be asked to remain off their antidepressant medications for at  
248 least 3 weeks following the psilocybin session until the primary endpoint assessment,  
249 or longer. Rescue medications are allowed as noted in the protocol. Participants who  
250 restart their antidepressant medications during the first 3 weeks after the psilocybin  
251 treatment administration will be assessed for reasons of resuming their medications  
252 and followed until 12 weeks post psilocybin administration.  
253  
254  
255  
256 Participants will be seen at the clinic for Screening (V1), Baseline (V2, Day -1), Day  
257 0 (V3, Dosing), Day 1 (V4), Week 1 (V5), Week 2 (V6), Week 3 (V7), Week 6  
258 (V8), Week 9 (V9), and Week 12 (V10). If participants are contacted or seen at the  
259 clinic between the initial Screening (V1) and the Baseline (V2) visit, the visits will  
260 be labelled V1a, V1b, V1c, etc.  
261  
262 **Inclusion Criteria**  
263  
264 Participants meeting all the following inclusion criteria at Screening (V1) should  
265 be considered for admission into the study  
266  
267 1. Signed ICF.  
268  
269 2. 18 years of age or older at Screening (V1); **up to 65 at**  
270 **Screening.**  
271  
272 3. Must meet DSM-5 criteria for bipolar II depression episode based on medical  
273 records, clinical assessment and documented completion of the version 7.0.2  
274 MINI.  
275  
276 4. HAM-D-17 (17-item) score  $\geq 18$  at Screening (V1) and at Baseline (V2). YMRS  
277  $< 10$  at V1 and V2.  
278  
279 5. Failure to respond to an adequate dose and duration of two or more  
280 pharmacological treatments for the current episode as determined through the  
281 MGH-ATRQ and the current episode  $> 3$  months. Failure includes inadequate  
282 response to an adequate duration and dose or failure  
283

285  
286  
287  
288  
289

290  
291 to reach an adequate dose and duration due to intolerance. Each augmentation  
292 strategy will be counted as an additional treatment.  
293

- 294  
295 6. Will have successfully discontinued all serotonergic medications at least 2  
296 weeks prior to Baseline (V2).  
297  
298 7. Ability to complete all protocol required assessment tools without any  
299 assistance, and to comply with all study visits.  
300

### 301 Exclusion Criteria

302 Participants meeting any of the following exclusion criteria at Screening (V1)  
303 will not be enrolled in the study.  
304

#### 305 *Psychiatric Exclusion Criteria:*

- 306  
307 1. Current or past history of bipolar I disorder, schizophrenia, psychotic disorder  
308 (including substance induced or due to a medical condition), delusional  
309 disorder, paranoid personality disorder, schizoaffective disorder, or borderline  
310 personality disorder, as assessed by medical history and a structured clinical  
311 interview (version 7.0.2 MINI).  
312  
313 2. Current cognitive behavioral therapy (CBT) that will not remain stable for the  
314 duration of the study. CBT cannot be initiated within 21 days of baseline.  
315  
316 3. Current (or < 1 year remission) alcohol or drug abuse as defined by DSM-5  
317 at Screening (V1).  
318  
319 4. Significant risk of suicide based on the C-SSRS defined as answering "YES" to  
320 question 4 or 5 for "Suicidal Ideation" [past 1 month] on the Columbia-Suicide  
321 Severity Rating Scale, and/or answering "YES" to any question for "Suicidal  
322 Behavior" [past 3 months] on the Columbia-Suicide Severity Rating Scale)  
323 Or, if active suicidal activity or ideation during the current episode, eligibility  
324 will be determined at the investigator's discretion.  
325  
326 5. Depression determined to be secondary to other severe medical conditions.  
327  
328 6. Other conditions, personal circumstances and behavior judged to be  
329 incompatible with establishment of rapport or safe exposure to psilocybin.  
330

#### 331 *General Medical Exclusion Criteria:*

- 332  
333 8. Women who are pregnant, nursing, or planning a pregnancy. Participants who  
334 are sexually active must agree to use a highly effective contraceptive method  
335 throughout their participation in the study. Women of child bearing potential  
336 must have a negative urine pregnancy test at Screening (V1) and Baseline(V2).  
337  
338 9. Cardiovascular conditions: recent stroke (< 1 year from signing of ICF), recent  
339 myocardial infarction (< 1 year from signing of ICF), uncontrolled hypertension  
340 (blood pressure > 140/90 mmHg) **or QTc > 450 msec** or clinically significant  
341 arrhythmia within 1 year of signing the ICF.  
342  
343 10. Untreated uncontrolled OR insulin-dependent diabetes.  
344  
345 11. Known seizure disorder.  
346  
347 12. Positive urine drug screen for illegal or drugs of abuse **(to include but not  
348 limited to opiates, PCP, cocaine, amphetamines,**  
349  
350  
351
- 
- 352  
353

|     |     |                                                                                                  |
|-----|-----|--------------------------------------------------------------------------------------------------|
| 354 |     |                                                                                                  |
| 355 | 419 |                                                                                                  |
| 356 | 420 | <b>methamphetamines, barbiturates and methadone) though cannabis for</b>                         |
| 357 | 421 | <b>medicinal purposes or recreational use is permitted</b> at V1 and V2. Any                     |
| 358 | 422 | positive urine drug test will be reviewed with participants to determine the                     |
| 359 | 423 | pattern of use and eligibility will be determined at the investigator's discretion               |
| 360 | 424 | in conjunction with the study physician.                                                         |
| 361 | 425 |                                                                                                  |
| 362 | 426 | 13. Current enrollment in any investigational drug or device study or participation              |
| 363 | 427 | in such within 30 days of Screening (V1).                                                        |
| 364 | 428 |                                                                                                  |
| 365 | 429 | 14. Current enrollment in an interventional study for depression or participation                |
| 366 | 430 | in such within 30 days of Screening (V1).                                                        |
| 367 | 431 |                                                                                                  |
| 368 | 432 | 15. Abnormal and clinically significant results on the physical examination,                     |
| 369 | 433 | vital signs, ECG, or laboratory tests at Screening (V1).                                         |
| 370 | 434 |                                                                                                  |
| 371 | 435 | 16. Any other clinically significant cardiovascular, pulmonary, gastrointestinal,                |
| 372 | 436 | hepatic, renal or any other major concurrent illness that, in the opinion of                     |
| 373 | 437 | the investigator, may interfere with the interpretation of the study results or                  |
| 374 | 438 | constitute a health risk for the participant if he/she takes part in the study.                  |
| 375 | 439 |                                                                                                  |
| 376 | 440 |                                                                                                  |
| 377 | 441 |                                                                                                  |
| 378 | 442 | <b>Investigational</b> Dose: 25 mg psilocybin given at 5 capsules of 5 mg each                   |
| 379 | 443 | <b>Product(s):</b>                                                                               |
| 380 | 444 | The primary endpoint is the change in MADRS total score from Baseline (Day -1) to                |
| 381 | 445 | 3 weeks (V7) from day 0 (V3).                                                                    |
| 382 | 446 |                                                                                                  |
| 383 | 447 | <b>Primary</b> The secondary endpoints are:                                                      |
| 384 | 448 | <b>Endpoint:</b>                                                                                 |
| 385 | 449 | • The proportion of participants with a response (defined as a $\geq 50\%$ improvement           |
| 386 | 450 | in MADRS total score from Baseline) at Week 3 post psilocybin.                                   |
| 387 | 451 |                                                                                                  |
| 388 | 452 | <b>Secondary</b> • The proportion of participants with remission (defined as a MADRS total score |
| 389 | 453 | <b>Endpoints:</b> $\leq 10$ ) at Week 3 post psilocybin.                                         |
| 390 | 454 |                                                                                                  |
| 391 | 455 | • The proportion of participants who have a sustained response at Week 12.                       |
| 392 | 456 |                                                                                                  |
| 393 | 457 | • Time to event measures: restart antidepressant medication for any reason, restart              |
| 394 | 458 | medication for continuing depressive symptoms, and relapse from a previously                     |
| 395 | 459 | recovered state (clinical judgement, supported by the QIDS-SR-16). Participants                  |
| 396 | 460 | who withdraw from the study will be censored from the time to event analysis.                    |
| 397 | 461 |                                                                                                  |
| 398 | 462 | The exploratory endpoints are:                                                                   |
| 399 | 463 |                                                                                                  |
| 400 | 464 |                                                                                                  |
| 401 | 465 | <b>Exploratory</b> • Change from Baseline in the following:                                      |
| 402 | 466 | <b>Endpoints:</b>                                                                                |
| 403 | 467 | ○ Q-LES-Q-SF at Week 3                                                                           |
| 404 | 468 | ○ SDS at Week 3                                                                                  |
| 405 | 469 |                                                                                                  |
| 406 | 470 | ○ GAD-7 at Week 3                                                                                |
| 407 | 471 | ○ QIDS-SR-16 at Week 3                                                                           |
| 408 | 472 | ○ WSAS at Week 3                                                                                 |
| 409 | 473 |                                                                                                  |
| 410 | 474 | <b>Efficacy and</b> • MADRS                                                                      |
| 411 | 475 | <b>Outcome</b>                                                                                   |
| 412 | 476 | <b>Measures:</b> • QIDS-SR-16                                                                    |
| 413 | 477 |                                                                                                  |
| 414 | 478 | • SDS                                                                                            |
| 415 | 479 |                                                                                                  |
| 416 | 480 | • GAD-7                                                                                          |
| 417 | 481 |                                                                                                  |
| 418 | 482 | • Q-LES-Q-SF                                                                                     |
|     | 483 | WSAS                                                                                             |
|     | 484 |                                                                                                  |
|     | 485 |                                                                                                  |
|     | 486 |                                                                                                  |
|     | 487 |                                                                                                  |
|     | 488 |                                                                                                  |
|     | 489 |                                                                                                  |

|     |                    |                                                                                              |
|-----|--------------------|----------------------------------------------------------------------------------------------|
| 490 |                    | 509                                                                                          |
| 491 |                    | 510                                                                                          |
| 492 |                    | 511                                                                                          |
| 493 |                    | 512                                                                                          |
| 494 | <b>Safety</b>      | 513                                                                                          |
| 495 | <b>Assessments</b> | 514 • ECG                                                                                    |
| 496 |                    | 515 • Vital signs                                                                            |
| 497 |                    | 516 • Blood test including liver function tests                                              |
| 498 |                    | 517 • Suicide risk as assessed by the C-SSRS                                                 |
| 499 |                    | 518 • AEs and Serious AEs                                                                    |
| 500 |                    | 519 • YMRS                                                                                   |
| 501 |                    | 520                                                                                          |
| 502 |                    | 521                                                                                          |
| 503 |                    | 522                                                                                          |
| 504 |                    | 523                                                                                          |
| 505 |                    | 524                                                                                          |
| 506 |                    | 525                                                                                          |
| 507 | <b>Statistical</b> | 526 <b><u>Analysis Sets</u></b>                                                              |
| 508 | <b>Procedures</b>  | 527                                                                                          |
|     |                    | 528 The Safety Population will consist of all participants who receive study treatment,      |
|     |                    | 529 of one dose. This population will be used for all summaries of participant               |
|     |                    | 530 accountability, demographic and baseline data, and safety information, including         |
|     |                    | 531 AE incidence.                                                                            |
|     |                    | 532                                                                                          |
|     |                    | 533                                                                                          |
|     |                    | 534 The modified intention-to-treat population will consist of all participants in the       |
|     |                    | 535 FAS that have at least 1 post dose assessment.                                           |
|     |                    | 536                                                                                          |
|     |                    | 537                                                                                          |
|     |                    | 538 <b><u>Sample Size Determination</u></b>                                                  |
|     |                    | 539                                                                                          |
|     |                    | 540 This is an exploratory open-label study in a population not previously studied. Thus,    |
|     |                    | 541 no sample size calculation was done.                                                     |
|     |                    | 542                                                                                          |
|     |                    | 543                                                                                          |
|     |                    | 544 <b><u>Primary and Secondary Efficacy Analyses</u></b>                                    |
|     |                    | 545                                                                                          |
|     |                    | 546 The primary efficacy endpoint (change from Baseline in MADRS total score at              |
|     |                    | 547 3 weeks (V7) from day 0 (V3) will be evaluated with a mixed-effects model                |
|     |                    | 548 for repeated measures.                                                                   |
|     |                    | 549                                                                                          |
|     |                    | 550 <b><u>Exploratory Analyses</u></b>                                                       |
|     |                    | 551                                                                                          |
|     |                    | 552 Change from baseline in continuous efficacy measures, including the QIDS-SR-16           |
|     |                    | 553 scale and GAD-7 total scores at each point, will be analyzed based on last               |
|     |                    | 554 observation carried forward data using an analysis of covariance model, with             |
|     |                    | 555 treatment and study site as factors, and the respective baseline score as the covariate. |
|     |                    | 556 The exploratory analyses for quality of life and wellbeing, functioning and              |
|     |                    | 557 associated disability, cognitive function, and anxiety are not hierarchical; there will  |
|     |                    | 558 be no correction for multiplicity in these analyses.                                     |
|     |                    | 559                                                                                          |
|     |                    | 560 Scores for all efficacy endpoints, including scores of the Q-LES-Q-SF, will be           |
|     |                    | 561 summarized over time using descriptive statistics for all visits during the              |
|     |                    | 562 observation period.                                                                      |
|     |                    | 563                                                                                          |
|     |                    | 564 The covariate selection process will be addressed in the Statistical Analysis Plan       |
|     |                    | 565 to be approved before any analyses are undertaken.                                       |
|     |                    | 566                                                                                          |
|     |                    | 567                                                                                          |
|     |                    | 568 <b><u>Safety Analysis</u></b>                                                            |
|     |                    | 569                                                                                          |
|     |                    | 570 Safety analyses will be performed using data from the Safety Population. Safety will     |
|     |                    | 571 be evaluated based on AEs, vital signs, clinical laboratory assessments performed        |
|     |                    | 572 by a CAP/CLIA approved laboratory, and ECG findings.                                     |
|     |                    | 573                                                                                          |
|     |                    | 574                                                                                          |
|     |                    | 575                                                                                          |



577 Study Schematic

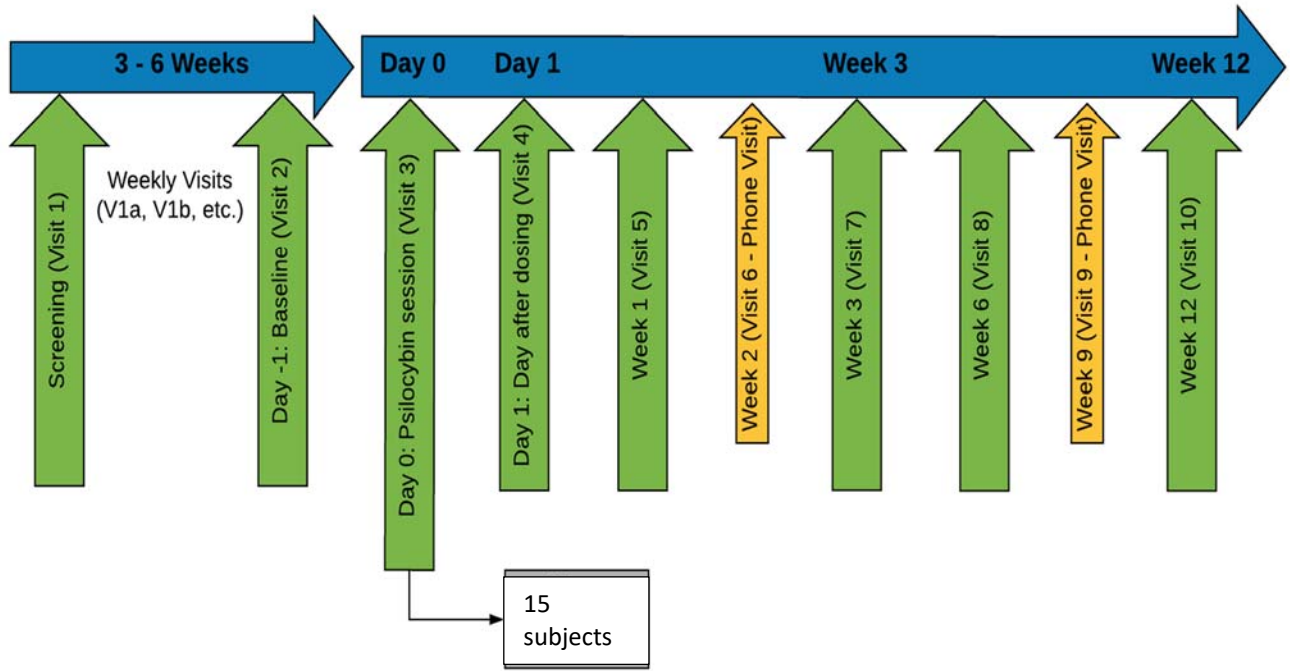

Green: In-Person Visits  
Yellow: Remote Visits

## TABLE OF CONTENTS

|                                                       |           |
|-------------------------------------------------------|-----------|
| STUDY SUMMARY .....                                   | 2         |
| STUDY SCHEMATIC .....                                 | 9         |
| TABLE OF CONTENTS .....                               | 10        |
| LIST OF TABLES .....                                  | 13        |
| LIST OF ABBREVIATIONS .....                           | 14        |
| <b>1 INTRODUCTION AND RATIONALE .....</b>             | <b>17</b> |
| 1.1 Background .....                                  | 17        |
| 1.2 Study Rationale .....                             | 17        |
| 1.2.1 Pharmacokinetics .....                          | 18        |
| 1.2.2 Preclinical Pharmacology .....                  | 18        |
| 1.2.3 Clinical Adverse Event Profile .....            | 19        |
| 1.2.4 Potential Risk to Fetal Development .....       | 19        |
| 1.2.5 Dosing Regimen .....                            | 19        |
| <b>2 STUDY OBJECTIVES .....</b>                       | <b>20</b> |
| 2.1 Primary .....                                     | 20        |
| 2.2 Secondary .....                                   | 20        |
| 2.3 Exploratory .....                                 | 20        |
| <b>3 STUDY ENDPOINTS .....</b>                        | <b>22</b> |
| 3.1 Primary .....                                     | 22        |
| 3.2 Secondary .....                                   | 22        |
| 3.3 Exploratory .....                                 | 22        |
| 3.4 Efficacy and Outcome Measures .....               | 22        |
| <b>4 STUDY PLAN .....</b>                             | <b>23</b> |
| 4.1 Study Design .....                                | 23        |
| 4.2 Study Schematic .....                             | 25        |
| 4.3 Schedule of Assessments .....                     | 26        |
| <b>5 POPULATION .....</b>                             | <b>30</b> |
| 5.1 Number of Participants .....                      | 30        |
| 5.2 Inclusion Criteria .....                          | 30        |
| 5.3 Exclusion Criteria .....                          | 30        |
| 5.4 Participant Screening .....                       | 32        |
| 5.5 Deviation from Inclusion/Exclusion Criteria ..... | 32        |
| <b>6 STUDY CONDUCT .....</b>                          | <b>33</b> |
| 6.1 General Instructions .....                        | 33        |
| 6.2 Study Procedures by Time Point .....              | 33        |
| 6.2.1 Screening Period .....                          | 33        |
| 6.2.2 Baseline Visit – Visit 2 – Day -1 .....         | 34        |
| 6.2.3 Visit 3 – Day 0 – Psilocybin Session .....      | 36        |
| 6.2.4 Visit 4 – Day 1 Postdosing .....                | 36        |

---

|     |               |                                                                                 |           |
|-----|---------------|---------------------------------------------------------------------------------|-----------|
| 586 |               |                                                                                 |           |
| 587 |               |                                                                                 |           |
| 588 | <b>6.2.5</b>  | <b>Visit 5 – 1 Week Postdosing.....</b>                                         | <b>36</b> |
| 590 | <b>6.2.6</b>  | <b>Visit 6 – 2 Weeks Postdosing.....</b>                                        | <b>37</b> |
| 591 | <b>6.2.7</b>  | <b>Visit 7 – 3 Weeks Postdosing.....</b>                                        | <b>37</b> |
| 593 | <b>6.2.8</b>  | <b>Visit 8 – 6 Weeks Postdosing.....</b>                                        | <b>37</b> |
| 594 | <b>6.2.9</b>  | <b>Visit 9 – 9 Weeks Postdosing.....</b>                                        | <b>38</b> |
| 595 | <b>6.2.10</b> | <b>Visit 10 – 12 Weeks Postdosing – End of Study.....</b>                       | <b>38</b> |
| 596 | <b>6.3</b>    | <b>Premature Discontinuation .....</b>                                          | <b>38</b> |
| 597 | <b>7</b>      | <b>DESCRIPTION OF STUDY PROCEDURES .....</b>                                    | <b>40</b> |
| 598 | <b>7.1</b>    | <b>Efficacy Assessments.....</b>                                                | <b>40</b> |
| 600 | <b>7.1.1</b>  | <b>Montgomery-Asberg Depression Rating Scale.....</b>                           | <b>40</b> |
| 601 | <b>7.1.2</b>  | <b>Quick Inventory of Depressive Symptomatology.....</b>                        | <b>40</b> |
| 602 | <b>7.1.3</b>  | <b>Sheehan Disability Scale.....</b>                                            | <b>40</b> |
| 603 | <b>7.1.4</b>  | <b>Generalized Anxiety Disorder scale.....</b>                                  | <b>40</b> |
| 605 | <b>7.1.5</b>  | <b>Quality of Life Enjoyment and Satisfaction Questionnaire-Short Form.....</b> | <b>41</b> |
| 606 | <b>7.1.6</b>  | <b>Work and Social Adjustment Scale .....</b>                                   | <b>41</b> |
| 607 | <b>7.2</b>    | <b>Safety Assessments .....</b>                                                 | <b>42</b> |
| 608 | <b>7.2.1</b>  | <b>Columbia-Suicide Severity Rating Scale.....</b>                              | <b>42</b> |
| 609 | <b>7.2.2</b>  | <b>Vital Signs .....</b>                                                        | <b>42</b> |
| 611 | <b>7.2.3</b>  | <b>Electrocardiogram .....</b>                                                  | <b>43</b> |
| 612 | <b>7.2.4</b>  | <b>Clinical Laboratory Tests.....</b>                                           | <b>43</b> |
| 613 | <b>7.2.5</b>  | <b>Adverse Events .....</b>                                                     | <b>44</b> |
| 614 | <b>7.3</b>    | <b>Other Assessment Instruments .....</b>                                       | <b>44</b> |
| 615 | <b>7.3.1</b>  | <b>Hamilton Depression Rating Scale – 17-item .....</b>                         | <b>44</b> |
| 616 | <b>7.3.2</b>  | <b>Mini International Neuropsychiatric Interview.....</b>                       | <b>44</b> |
| 617 | <b>7.3.3</b>  | <b>Maudsley Staging Method.....</b>                                             | <b>44</b> |
| 618 | <b>7.3.4</b>  | <b>The Challenging Experience Questionnaire.....</b>                            | <b>45</b> |
| 619 | <b>7.3.5</b>  | <b>The Revised Mystical Experience Questionnaire.....</b>                       | <b>45</b> |
| 621 | <b>7.3.6</b>  | <b>Five Dimension Altered States of Consciousness Questionnaire.....</b>        | <b>45</b> |
| 622 | <b>7.3.7</b>  | <b>Emotional Breakthrough Inventory .....</b>                                   | <b>46</b> |
| 624 | <b>7.4</b>    | <b>Protocol Deviations .....</b>                                                | <b>46</b> |
| 625 | <b>8</b>      | <b>INVESTIGATIONAL PRODUCT MANAGEMENT .....</b>                                 | <b>47</b> |
| 626 | <b>8.1</b>    | <b>Description .....</b>                                                        | <b>47</b> |
| 627 | <b>8.1.1</b>  | <b>Formulation .....</b>                                                        | <b>47</b> |
| 629 | <b>8.1.2</b>  | <b>Storage.....</b>                                                             | <b>47</b> |
| 630 | <b>8.2</b>    | <b>Packaging .....</b>                                                          | <b>47</b> |
| 631 | <b>8.3</b>    | <b>Dose and Administration.....</b>                                             | <b>48</b> |
| 632 | <b>8.3.1</b>  | <b>Goals.....</b>                                                               | <b>48</b> |
| 633 | <b>8.3.2</b>  | <b>Methods.....</b>                                                             | <b>48</b> |
| 635 |               |                                                                                 |           |
| 636 |               |                                                                                 |           |
| 637 |               |                                                                                 |           |

|        |                                                                                                |    |
|--------|------------------------------------------------------------------------------------------------|----|
| 8.3.3  | Structure of the Psilocybin Session .....                                                      | 49 |
| 8.3.4  | Before the Session .....                                                                       | 51 |
| 8.3.5  | Onset of Action .....                                                                          | 53 |
| 8.3.6  | Emergency Protocol .....                                                                       | 56 |
| 8.3.7  | Peak Experience .....                                                                          | 56 |
| 8.3.8  | Conclusion of the Psilocybin Session .....                                                     | 57 |
| 8.3.9  | Specific Criteria for Discharge from the Facility on the<br>Day of Drug Administration .....   | 58 |
| 8.3.10 | Planning for Unexpected Adverse Events.....                                                    | 59 |
| 8.4    | Accountability .....                                                                           | 59 |
| 8.5    | Concomitant Therapy .....                                                                      | 59 |
| 8.5.1  | Permissible Medications .....                                                                  | 60 |
| 8.5.2  | Definition of Women of Childbearing Potential and/or Acceptable<br>Contraceptive Methods ..... | 60 |
| 8.5.3  | Prohibited Medications .....                                                                   | 61 |
| 8.5.4  | Rescue Medication .....                                                                        | 63 |
| 8.6    | Compliance .....                                                                               | 63 |
| 9      | ADVERSE EVENTS .....                                                                           | 64 |
| 9.1    | Documenting Adverse Events .....                                                               | 64 |
| 9.2    | Assessment of Intensity.....                                                                   | 65 |
| 9.3    | Assessment of Causality .....                                                                  | 66 |
| 9.4    | Other Action Taken for Event .....                                                             | 66 |
| 9.5    | Adverse Event Outcome .....                                                                    | 67 |
| 9.6    | Clinical Laboratory Changes .....                                                              | 67 |
| 9.7    | Overdose .....                                                                                 | 67 |
| 9.9    | Adverse Event Follow-up .....                                                                  | 68 |
| 10     | SERIOUS ADVERSE EVENTS .....                                                                   | 68 |
| 10.1   | Definition of Serious Adverse Event .....                                                      | 68 |
| 10.2   | Reporting Serious Adverse Events .....                                                         | 69 |
| 11     | STATISTICS .....                                                                               | 70 |
| 11.1   | Statistical Methods .....                                                                      | 70 |
| 11.2.1 | Efficacy and Outcome Measures .....                                                            | 70 |
| 11.2.2 | Analysis of Efficacy .....                                                                     | 70 |
| 11.2.3 | Analysis of Safety .....                                                                       | 71 |
| 11.2.4 | Demographic and Baseline Characteristics .....                                                 | 72 |
| 11.2.5 | Data Safety Monitoring Board.....                                                              | 72 |
| 12     | ETHICS AND RESPONSIBILITIES .....                                                              | 73 |
| 12.1   | Good Clinical Practice .....                                                                   | 73 |
| 12.2   | Steering Committee .....                                                                       | 73 |
| 12.3   | Institutional Review Board/Independent Ethics Committee .....                                  | 73 |

638  
639

640

641

|      |                                                 |    |
|------|-------------------------------------------------|----|
| 12.4 | Informed Consent .....                          | 73 |
| 12.5 | Exposure in Utero During Clinical Studies ..... | 73 |
| 12.6 | Records Management .....                        | 74 |
| 12.7 | Source Documentation.....                       | 74 |
| 12.8 | Study Files and Record Retention .....          | 74 |
| 13   | STUDY DISCONTINUATION .....                     | 74 |
| 14   | CONFIDENTIALITY .....                           | 75 |
| 15   | REFERENCES .....                                | 76 |

642  
643  
644  
645  
646  
647  
648  
649  
650  
651  
652  
653  
654  
655  
656  
657  
658  
659  
660  
661  
662  
663  
664  
665  
666  
667  
668  
669  
670  
671  
672  
673  
674  
675  
676  
677  
678  
679  
680  
681  
682  
683

**LIST OF TABLES**

|                  |                                                 |           |
|------------------|-------------------------------------------------|-----------|
| <b>Table 8.1</b> | <b>Details of Investigational Product .....</b> | <b>47</b> |
|------------------|-------------------------------------------------|-----------|

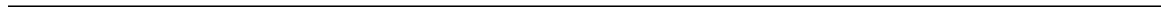

684  
685**LIST OF ABBREVIATIONS**

686

|              | 690              |     | 691 | 690 | 691 | Definition                                                         |
|--------------|------------------|-----|-----|-----|-----|--------------------------------------------------------------------|
| Abbreviation |                  |     |     |     |     |                                                                    |
|              |                  |     |     | 746 |     |                                                                    |
|              | 5D-ASC           | 747 |     | 748 |     | Five Dimension Altered States of Consciousness questionnaire       |
|              | AE               | 749 |     | 750 |     | adverse event                                                      |
|              | AESI             | 751 |     | 752 |     | adverse event of special interest                                  |
|              | ALT              | 753 |     | 754 |     | alanine aminotransferase                                           |
|              | AST              | 755 |     | 756 |     | aspartate aminotransferase                                         |
|              | bpm              | 757 |     | 758 |     | beats per minute                                                   |
|              | BP-II            | 759 |     |     |     | Bipolar Disorder (Type 2)                                          |
|              | CBT              | 760 |     | 761 |     | cognitive behavioral therapy                                       |
|              | CFR              | 762 |     | 763 |     | Code of Federal Regulations                                        |
|              | CI               | 764 |     |     |     | confidence interval                                                |
|              |                  |     |     | 765 |     |                                                                    |
|              | C-SSRS           | 766 |     | 767 |     | Columbia-Suicide Severity Rating Scale                             |
|              | DSM-5            | 768 |     |     |     | Diagnostic and Statistical Manual of Mental Disorders, 5th edition |
|              | EBI              | 769 |     |     |     | Emotional Breakthrough Inventory                                   |
|              | EC <sub>50</sub> | 770 |     | 771 |     | half-maximal effective concentration                               |
|              | ECG              | 772 |     | 773 |     | electrocardiogram                                                  |
|              | eCRF             | 774 |     | 775 |     | electronic Case Report Form                                        |
|              | EIU              | 776 |     | 777 |     | Exposure In Utero                                                  |
|              | EOS              | 778 |     | 779 |     | End of Study                                                       |
|              | ET               | 780 |     | 781 |     | early termination                                                  |
|              | FAS              | 782 |     | 783 |     | full analysis set                                                  |
|              | GAD-7            | 784 |     | 785 |     | Generalized Anxiety Disorder Scale                                 |
|              | GCP              | 786 |     | 787 |     | Good Clinical Practices                                            |
|              | h                | 788 |     | 789 |     | hours                                                              |
|              | HAM-D-17         | 790 |     | 791 |     | Hamilton Depression Rating Scale                                   |
|              | HDPE             | 792 |     | 793 |     | high density polyethylene                                          |
|              | IB               | 794 |     | 795 |     | Investigator's Brochure                                            |
|              | ICF              | 796 |     |     |     | informed consent form                                              |

798

799

800

801

802

| <b>Abbreviation</b> | <b>Definition</b>                                                              |
|---------------------|--------------------------------------------------------------------------------|
| ICH                 | International Conference on Harmonization                                      |
| IEC                 | Independent Ethics Committee                                                   |
| IP                  | investigational product                                                        |
| IRB                 | Institutional Review Board                                                     |
| IV                  | intravenous                                                                    |
| IWRS                | Interactive Web-based Response System                                          |
| kg                  | kilogram                                                                       |
| L                   | liters                                                                         |
| MADRS               | Montgomery-Asberg Depression Rating Scale                                      |
| MedDRA              | Medical Dictionary for Regulatory Activities                                   |
| mg                  | milligram                                                                      |
| MGH-ATRQ            | Massachusetts General Hospital-Antidepressant Treatment Response Questionnaire |
| min                 | minute                                                                         |
| MINI                | Mini International Neuropsychiatric Interview                                  |
| mL                  | milliliters                                                                    |
| mmHg                | millimeters of mercury                                                         |
| ng                  | nanogram                                                                       |
| PI                  | Principal Investigator                                                         |
| PRN                 | <i>pro re nata</i> , as needed                                                 |
| PS                  | Prescreen                                                                      |
| PT                  | Preferred Term                                                                 |
| P-TRD               | psilocybin for treatment-resistant depression                                  |
| QIDS                | Quick Inventory of Depressive Symptoms                                         |
| QIDS-SR-16          | Quick Inventory of Depressive Symptomatology – Self-Rated                      |
| SAE                 | Serious Adverse Event                                                          |
| SAP                 | Statistical Analysis Plan                                                      |
| SD                  | standard deviation                                                             |
| SDS                 | Sheehan Disability Scale                                                       |
| STAR-C              | Scale to Assess Therapeutic Relationship – Clinician version                   |

803  
804  
805

806  
807

---

| <b>Abbreviation</b> | <b>Definition</b>                |
|---------------------|----------------------------------|
| TRD                 | treatment-resistant depression   |
| UK                  | United Kingdom                   |
| ULN                 | upper limit of normal            |
| US                  | United States                    |
| VAS                 | visual analog scale              |
| Worldwide           | Worldwide Clinical Trials, Inc.  |
| WSAS                | Work and Social Adjustment Scale |
| YMRS                | Young Mania Rating Scale         |

808  
809  
810  
811  
812  
813  
814  
815  
816  
817  
818  
819  
820  
821  
822  
823  
824  
825  
826  
827  
828  
829  
830  
831  
832  
833  
834  
835  
836  
837  
838  
839  
840  
841  
842  
843  
844  
845  
846  
847  
848  
849  
850  
851  
852  
853  
854  
855  
856  
857

---

858  
859



# 1 INTRODUCTION AND RATIONALE

The following is a summary of the information found in the current Investigator's Brochure (IB).<sup>8</sup>

## 1.1 Background

Psilocybin belongs to a class of drugs referred to as psychedelics ('mind-manifesting'). Specifically, psilocybin is considered a 5-hydroxytryptaminergic (serotonergic) psychedelic, along with other tryptamines such as dimethyltryptamine (DMT), ergolines such as lysergic acid diethylamide (LSD), and phenethylamines such as mescaline. Psilocybin was first isolated from psilocybin mushrooms by Hofmann in 1957, and later synthesized by him in 1958.<sup>26</sup> Psilocybin has been used in psychiatric research and in psychodynamic orientated psychotherapy from the early to mid-1960s up until it became a Schedule 1 substance in the United States (US) in 1970, and until the 1980s in Germany.<sup>26,27</sup> Research on the effects of psilocybin resumed in the mid-1990s, and it is currently the preferred compound for use in clinical research of 5 - hydroxytryptaminergic psychedelics,<sup>5,14,19</sup> because it has a shorter duration of action and suffers from less notoriety and stigma than other similar drugs.

## 1.2 Study Rationale

Carhart-Harris conducted an open-label feasibility study in 12 patients (6 men and 6 women) with moderate-to-severe, unipolar, treatment-resistant major depression (ISRCTN 14426797).<sup>4</sup> Each patient received 2 oral doses of psilocybin (10 mg and 25 mg, 7 days apart) in a supportive setting. There was no control group. Psychological support was provided before, during, and after each session. The primary outcome measure was patient-reported intensity of psilocybin's effects. Patients were monitored for adverse events (AEs) during the dosing sessions and at subsequent clinic and remote follow-ups. Depressive symptoms were assessed using the 16-item Quick Inventory of Depressive Symptoms (QIDS); QIDS scores were obtained from week 1 to the 3 months following dosing. Psilocybin's acute psychedelic effects were detectable 30 to 60 minutes (min) after dosing, peaked 2 to 3 hours (h) after dosing, and subsided at least 6 h after dosing. Mean self-rated intensity (on a scale of 0-1) was 0.51 (standard deviation [SD] 0.36) for the low-dose session and 0.75 (SD 0.27) for the high-dose session. Compared to baseline, depressive symptoms were markedly reduced 1 week (means QIDS difference - 11.8, 95% confidence interval (CI) -9.15 to -14.35,  $p=0.002$ , Hedges'  $g=3.1$ ) and 3 months (-9.2, 95% CI -5.69 to -12.71,  $p=0.003$ , Hedges'  $g=2$ ) after high-dose treatment. Marked and sustained improvements in anxiety and anhedonia were also noted. Psilocybin was well tolerated and no serious or unexpected AEs were reported. The AEs noted were transient anxiety (12/12 patients, 100%) during psilocybin onset, transient confusion or thought disorder (9/12 patients, 75%), mild transient nausea (4/12 patients, 33%), and transient headache (4/12 patients, 33%).

Bipolar depression remains the mood disorder condition with the fewest somatic treatment options. Current FDA approvals for bipolar depression are limited to several atypical antipsychotics and one anticonvulsant. Even within the framework of bipolar disorder, there is evidence to support a different treatment paradigm for those with a clear history of bipolar type I versus bipolar type II. While conventional wisdom has slanted toward lumping all bipolar depression into one treatment category, a recent study supports the notion that bipolar II patients may do just as well with or without mood stabilizers (Altshuler 2017 AJP)<sup>43</sup>. Given a gradually re-emerging evidence base for the use of psilocybin in a difficult to treat unipolar depressed group, there is an open question

917 as to whether this effect may carry over to patients with a difficult to treat mood disorder  
918 that includes a history of hypomania or low grade mixed states. This study proposes to  
919 determine if there is a signal for response as well as sufficient safety for the use of  
920 psilocybin in depressed patients who meet the diagnostic criteria for bipolar type II.  
~~921~~

---

### 1.2.1 Pharmacokinetics

Psilocybin is detectable in plasma 20 to 40 min after oral administration of 0.224 mg/kg (10-20 mg total dose).<sup>17</sup> Orally ingested psilocybin is metabolized (dephosphorylated) in the liver, and primarily transformed into the active hydroxy metabolite, psilocin.

Psilocybin is detectable in plasma 30 min after administration,<sup>17,20,22,26</sup> and psilocin is detectable in plasma 15 to 50 min after oral administration of 0.2 mg/kg psilocybin. Therefore, psilocybin is essentially a prodrug and psilocin represents the pharmacologically active agent in systemic circulation. The elimination half-life of psilocybin is 50 min.<sup>22</sup> Psilocin's half-life ranges between 2 and 3 h, and is detectable 6 h after oral administration.<sup>17,22</sup> Hasler et al.<sup>17</sup> and Lindenblatt et al.<sup>22</sup> reported similar but not identical findings, with peak levels of psilocin appearing between 80 to 105 min and psilocin half-life ranging between 2.25 h for 0.2 mg/kg and 2.7 h for 0.22 mg/kg. The majority, 80%, of psilocin in plasma was found to be in a conjugated form. Both psilocin (at 90-97%) and psilocybin (3-10%) are detectable in human urine, unmodified (only 3-10%) and particularly conjugated with glucuronic acid.<sup>18</sup> The majority of psilocin recovered in urine is excreted within 3 h after oral administration and is completely eliminated from the body within 24 h.<sup>18</sup>

### 1.2.2 Preclinical Pharmacology

Psilocybin and its active metabolite psilocin directly affect a number of 5-HT receptor subtypes without directly affecting other neurotransmitter systems.

Human psilocybin research has confirmed the importance of 5-HT<sub>2A</sub> stimulation for the psychedelic effects of psilocybin and psilocin as the effects can be blocked by a 5-HT<sub>2A</sub> receptor antagonist.<sup>38</sup> Reviews of the pharmacology of psilocybin is provided by Passie, and more current knowledge and perspective by Tyls et al.<sup>26,37</sup>

When assessed for potential effects on the human-ether-à-go-go related gene channel psilocybin was shown to be without significant effects when tested up to concentrations of 1 mM.

Although the literature on the effect of psilocin at the 5-HT<sub>2B</sub> is somewhat contradictory, the most recent publication by Rickli et al. indicates that the half-maximal effective concentration (EC<sub>50</sub>) for activation of the 5-HT<sub>2B</sub> receptor is greater than 20 μM.<sup>29</sup> That concentration would generally be considered to be pharmacologically inactive *in vivo* because plasma concentrations would never reach 20 μM or greater after a single administration of psilocin. Brown et al. indicate that the maximal plasma concentration achieved after a single dose of 0.45 mg/kg in normal humans would not reach 200 nM (0.2 μM).<sup>1</sup> In any event, all studies suggest that chronic activation of the 5-HT<sub>2B</sub> is necessary in order to invoke cardiac valvulopathy, and with a single administration there

---

971 should be no concern for that effect. With the EC<sub>50</sub> reported by Rickli et al, even multiple  
972 administrations of psilocin would not be expected to be harmful. The valvulopathy  
973 induced by Fen-phen, or ergoline type anti-Parkinson agents, involved daily  
974 administration of the drugs over a significant period of time. Thus, there is no  
975 expectation that single use of psilocybin will be problematic.  
976  
977

### 978 **1.2.3 Clinical Adverse Event Profile**

979  
980 The use of psilocybin in psychotherapy have been reported since the 1960's, but these  
981 studies suffer from a lack of experimental control and standardised assessments. Owing  
982 to the absence of adequate control groups, and use of follow-up measurements with  
983 vague criteria for therapeutic outcomes, the studies do not clearly distinguish between  
984 the drug or the therapeutic engagement itself that produced the reported beneficial effect.  
985

986 The safety of psilocybin should be considered in terms of benefit and risk. Within the  
987 context of psilocybin administration in a controlled setting, a participant may report  
988 visual or auditory disturbances, feelings of unreality, altered sense of time, and other  
989 changes in mood or affect amongst other neuropsychiatric observations which have been  
990 previously described (see Table 4.1 of the current Psilocybin IB).<sup>8</sup> These effects are  
991 both expected, and may be a necessary component of therapeutic response. Investigators  
992 must follow regulatory guidance under 21 CFR 312.32(a) for AE reporting which  
993 addresses untoward medical occurrences associated with the use of a drug in humans,  
994 whether or not considered drug related. An AE can be any unfavourable and unintended  
995 sign (eg, an abnormal laboratory finding), symptom, or disease temporally associated  
996 with the use of a drug, without any judgment about causality. However, because self-  
997 reports of intrapsychic events associated with psilocybin usage may be neither  
998 unfavourable nor unintended, an investigator may not regard the self-reports as an AE  
999 but rather as an essential product attribute for therapeutic response. The reporting of  
1000 psilocybin associated observations as AEs should be informed by this context.  
1001

### 1002 **1.2.4 Potential Risk to Fetal Development**

1003  
1004 Reproductive toxicology studies have not been performed to establish risk to the fetus;  
1005 however, the results of Ames test, the human lymphocyte micronucleus assay and the *in*  
1006 *vivo* rat micronucleus study clearly indicate no potential for genotoxicity with  
1007 psilocybin. It is recommended to prevent or eliminate such risk, if any, women should  
1008 not be pregnant or lactating and should be using an effective method of birth control  
1009 when using psilocybin.  
1010

### 1011 **1.2.5 Dosing Regimen**

1012  
1013 Carhart-Harris successfully evaluated 2 oral doses of psilocybin (10 mg and 25 mg)  
1014 administered 7 days apart to patients with unipolar TRD; minimal AEs were reported in  
1015 this study.<sup>4</sup> Work by the Griffiths group showed that under supportive conditions,  
1016 psilocybin at doses of 20 to 30 mg/70 kg can dose-dependently occasion mystical-type  
1017 experiences.<sup>15</sup>  
1018

---

1020  
1021  
1022  
1023  
1024  
1025  
1026  
1027  
1028  
1029  
1030  
1031  
1032  
1033  
1034  
1035  
1036  
1037  
1038  
1039  
1040  
1041  
1042  
1043  
1044  
1045  
1046  
1047  
1048  
1049  
1050  
1051  
1052  
1053  
1054  
1055  
1056  
1057  
1058  
1059  
1060  
1061  
1062  
1063  
1064  
1065  
1066  
1067  
1068  
1069  
1070  
1071

## 2 STUDY OBJECTIVES

The main purpose of the study is to determine if there is a signal for efficacy of a psychedelic agent in BP-II, current episode depressed.

### 2.1 Primary

The primary objective of this study is to evaluate the efficacy of psilocybin (25 mg) administered under supportive conditions to adult participants with BP-II, current episode depressed, in improving depressive symptoms, as assessed by the change in the Montgomery-Asberg Depression Rating Scale (MADRS) total score from Baseline. Baseline is defined as the assessment score obtained on Day -1. The primary timepoint is Week 3; this variable will be analyzed for the change from Baseline to Day 1, and Weeks 1, 3, 6, 9, and 12.

### 2.2 Secondary

The secondary objectives are:

- To assess the efficacy of psilocybin in an open study on BP-II, current episode depressed:
  - Proportion of participants with response defined as a  $\geq 50\%$  decrease in MADRS total score from Baseline to Week 3. This will also be assessed at Day 1 and at Weeks 1, 6, 9, and 12.
  - Proportion of participants in remission defined as the participants with a MADRS total score  $\leq 10$  at Week 3. This will also be assessed at Day 1 and at Weeks 1, 6, 9, and 12.
  - Proportion of responding participants who sustained a response up to Week 12, defined as those with  $\geq 50\%$  decrease in MADRS total score on or before Week 6 and remaining at Week 12.
- To evaluate the safety and tolerability of psilocybin in participants with BP-II, current episode depressed based on Young Mania Rating Scale (YMRS) AEs, changes in vital signs, and suicidal ideation/behavior (measured using the Columbia-Suicide Severity Rating Scale [C-SSRS]) score at all visits.

### 2.3 Exploratory

The exploratory objectives are:

- To evaluate the effects of psilocybin on quality of life and wellbeing, functioning and associated disability, cognitive function, and anxiety on:
-

- 1072
- 1073
- 1074
- 1075
- 1076
- 1077
- 1078
- 1079
- 1080
- 1081
- 1082
- 1083
- 1084
- 1085
- 1086
- 1087
- 1088
- 1089
- 1090
- 1091
- ~~1092~~
- 1094
- 1095
- ~~1096~~
- 1098
- 1099
- 1100
- 1101
- 
- 1102
- 1103
- Quality of life in enjoyment and satisfaction questionnaire-short form (Q-LES-Q-SF ) score change from Baseline to Week 3. This will also be assessed at Week 12.
  - Functioning and associated disability in the Sheehan Disability Scale (SDS) score change from Baseline to Week 3. This will be also assessed at Week 12.
  - Level of anxiety as measured using the change in Generalized Anxiety Disorder 7 item Scale (GAD-7) total score change from Baseline to Week 3. This will also be assessed at Week 12.
  - Participant determined level of depression as measured using the change in Quick Inventory of Depressive Symptomatology Self-Rated (QIDS-SR-16) total score from Baseline to Week 3. This will also be assessed at Screening, Day 1, and Weeks 1, 2, 6, 9, and 12.
  - Psychosocial functioning and predictor of response durability as measured using the change in Work and Social Adjustment Scale (WSAS) from Baseline to Week 3. This will also be assessed at Week 12.

1104  
 1105  
 1106  
 1107  
 1108  
 1109  
 1110  
 1111  
 1112  
 1113  
 1114  
 1115  
 1116  
 1117  
 1118  
 1119  
 1120  
 1121  
 1122  
 1123  
 1124  
 1125  
 1126  
 1127  
 1128  
 1129  
 1130  
 1131  
 1132  
 1133  
 1134  
 1135  
 1136  
 1137  
 1138  
 1139  
 1140  
 1141  
 1142  
 1143  
 1144  
 1145  
 1146  
 1147  
 1148  
 1149  
 1150  
 1151  
 1152  
 1153  
 1154  
 1155  
 1156  
 1157  
 1158  
 1159  
 1160

### 3 STUDY ENDPOINTS

#### 3.1 Primary

The primary endpoint is the change in MADRS total score from Baseline (Day -1) to 3 weeks post psilocybin.

#### 3.2 Secondary

The secondary endpoints are:

- The proportion of participants with a response (defined as a  $\geq 50\%$  improvement in MADRS total score from Baseline) at Week 6 after the psilocybin session.
- The proportion of participants with remission (defined as a MADRS total score  $\leq 10$ ) at Week 3 post psilocybin.
- The proportion of participants who have a sustained response at Week 12.
- Time to event measures: restart antidepressant medication for any reason, restart medication for continuing depressive symptoms, and relapse from a previously recovered state (clinical judgement, supported by the QIDS-SR-16). Participants who withdraw from the study will be censored from the time to event analysis.

#### 3.3 Exploratory

The exploratory endpoints are:

- Change from Baseline in the following:
  - Q-LES-Q-SF at Week 3
  - SDS at Week 3
  - GAD-7 at Week 3
  - QIDS-SR-16 at Week 3
  - WSAS at Week 3

#### 3.4 Efficacy and Outcome Measures

Measures of interest include:

- MADRS
- SDS
- QIDS-SR-16
- GAD-7
- Q-LES-Q-SF
- WSAS

## 4 STUDY PLAN

### 4.1 Study Design

This is a single center, fixed dose, open trial. The study population will include adult men and women, 18 to 65 years of age, with BP-II, current episode depressed. Participants with BP-II, current episode depressed, are defined as those who meet the Diagnostic and Statistical Manual of Mental Disorders (5<sup>th</sup> Edition; DSM-5) diagnostic criteria for recurrent episodes of major depressive and hypomanic episodes without psychotic features which have failed to respond to an adequate dose and duration of  $\geq 2$  pharmacological treatments for the current episode and the duration of the current episode is 3 months to 2 years. Failure includes inadequate response to an adequate duration and dose or failure to reach an adequate dose and duration due to lack of tolerance. Augmentation counts as a second treatment.

Participants will be recruited primarily from general practitioners and specialized psychiatric services.

The majority of participants will have no prior exposure to psilocybin or so-called magic mushrooms. Past exposure to psilocybin has to be more than 12 months prior to Screening and not during the current depressive episode.

After signing the informed consent form (ICF), participants will be assessed for their eligibility with the Mini International Neuropsychiatric Interview (MINI), the Hamilton Depression Rating Scale (HAM-D-17), the Maudsley Staging Method (MSM), The Young Mania Rating Scale (YMRS), and the Columbia-Suicide Severity Rating Scale (C-SSRS). Those who meet the eligibility criteria will enter the screening period which will last between 3 and 6 weeks. At the initial Screening visit (V1), the participant will also be evaluated with the QIDS-SR-16. Additionally, a medical history, an electrocardiogram (ECG), blood tests, and vital signs will be obtained.

During the screening period, participants who are on serotonergic medications will be expected to complete the taper at least 2 weeks prior to Baseline (V2). Participants will be given a choice of the tapering rate. During the tapering period all participants will be supported by the study clinician during the discontinuation of any disallowed medications and their reinstatement.. The designated study nurse or co-ordinator will be in frequent contact with the participants to monitor for withdrawal and worsening of depression symptoms. Participants will be assessed for suicidality with the C-SSRS at each contact/visit. The study clinician will communicate any pertinent information via telephone or by fax to the patient's provider.

All participants will be evaluated for safety at the clinic weekly for a minimum of 3 weeks prior to psilocybin administration to ensure safe discontinuation of current antidepressant therapy required by the protocol. Participants' family members and/or

---

1162  
1163  
1164  
1165  
1166  
1167  
1168  
1169  
1170  
1171  
1172  
1173  
1174  
1175  
1176  
1177  
1178  
1179  
1180  
1181  
1182  
1183  
1184  
1185  
1186  
1187  
1188  
1189  
1190  
1191  
1192  
1193  
1194  
1195  
1196  
1197  
1198  
1199  
1200  
1201  
1202  
1203  
1204  
1205  
1206  
1207  
1208  
1209  
1210



caregivers will be educated about the signs of worsening of depression and suicidality, and instructed on ways to contact the study team in case of significant worsening of depression. Any safety assessment visits during the screening period will be called V1a, V1b, etc. During these visits, the C-SSRS and any changes in medications since the previous visit will be obtained in addition to other assessments at the study clinician's discretion.

The day before psilocybin session, the participants will undergo a baseline assessment (3 to 6 weeks after initial Screening [V1] + 7 day window) that will consist of the HAM-D-17, MADRS, QIDS-SR-16, C-SSRS, SDS, GAD-7, Q-LES-Q-SF, WSAS, YMRS, vital signs, urinalysis, urine drug screen, and urine pregnancy test for women of childbearing potential. All participants will also have a psychoeducation session with their therapist to discuss what to expect during the psilocybin session at V1 and baseline V2. The therapist and a participant will review psychoeducational materials provided at the time of enrollment.

The psilocybin administration session (V3, Day 0) will last approximately 6 hours and will be supported by a trained therapist. A full description of the activities of the psilocybin administration session is found in the Study Manual. After the acute effects of the psilocybin pass, participants will be evaluated for safety and discharged home with a chaperone. On Day 1 (V4), the day following psilocybin administration, participants will be seen in person for a safety check, assessment of suicidality, and to discuss their experience during the psilocybin session. Participants should be allowed and encouraged to discuss insights that may otherwise be fleeting while the participant is under the influence of the drug. All sessions between the therapist and the participant may be audio recorded for adherence monitoring and quality assurance. Audio and video recording of the sessions are subject to participant consent. Participants who do not consent to either or all recordings will not be excluded from the study. Participants will meet with study therapist on V4, V5, V7 for integration sessions and a final check in on V10.

All participants will be asked to remain off their antidepressant medications for at least 3 weeks following the psilocybin session until the primary endpoint assessment, or longer. Rescue medications are allowed as noted in Section 8.5.4. Participants who restart their antidepressant medications during the first 3 weeks after the psilocybin treatment administration will be assessed for reasons of resuming their medications and followed until 12 weeks post psilocybin administration.

The treatment period will include 1 dose of 25 mg

Participants will be seen at the clinic for Screening (V1), Baseline (V2, Day -1), Day 0 (V3, Dosing), Day 1 (V4), Week 1 (V5), Week 2 (V6), Week 3 (V7), Week 6 (V8), Week 9 (V9) and Week 12 (V10).

---

If participants are contacted or seen at the clinic between the initial Screening (V1) and the Baseline (V2) visit, the visits will be labelled V1a, V1b, V1c, etc.

The study schematic is presented in Section 4.2 and the schedule of assessments is presented in Section 4.3.

1 4.2 Study Schematic

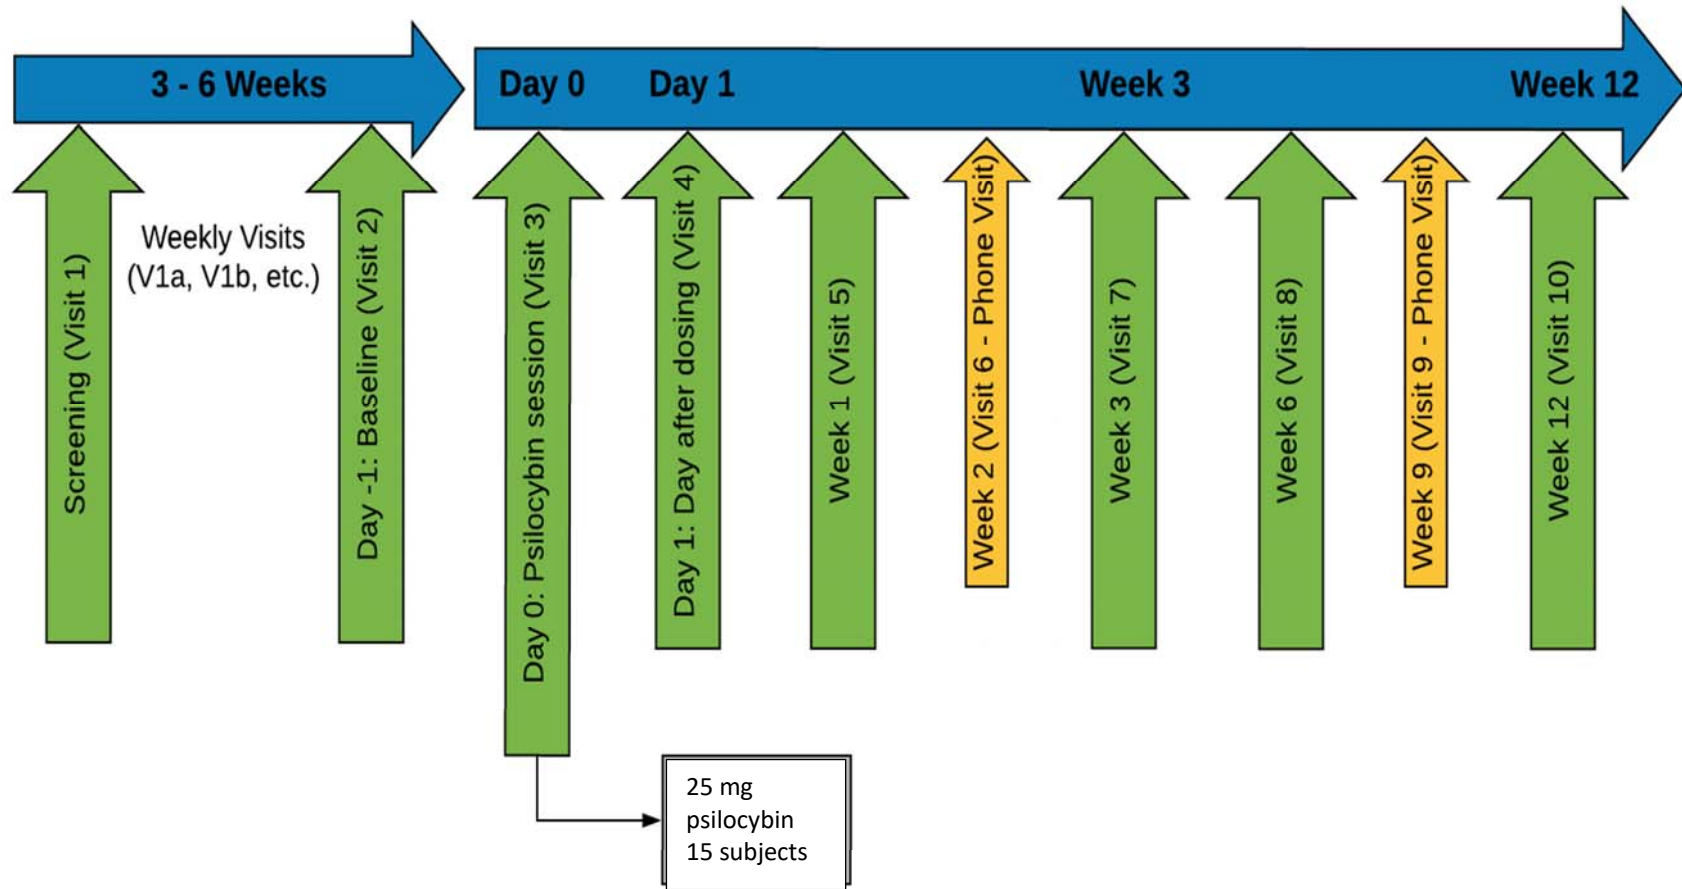

**Green:** In-Person Visits  
**Yellow:** Remote Visits

2  
3  
4  
5  
6  
7  
8  
9  
10

11

### 4.3 Schedule of Assessments

|                                        | ≥3 weeks prior to Psilocybin Session |                      |                               | Time Post Psilocybin Session |                 |                  |                  |                  |                  |                           |
|----------------------------------------|--------------------------------------|----------------------|-------------------------------|------------------------------|-----------------|------------------|------------------|------------------|------------------|---------------------------|
|                                        | Screen Visit <sup>2</sup><br>Day -21 | Baseline<br>(Day -1) | Psilocybin Session<br>(Day 0) | Day 1                        | Week 1<br>Day 7 | Week 2<br>Day 14 | Week 3<br>Day 21 | Week 6<br>Day 42 | Week 9<br>Day 63 | Week 12<br>Day 84<br>(ET) |
| Visit                                  | 1                                    | 2                    | 3                             | 4                            | 5               | 6                | 7                | 8                | 9                | 10                        |
| Location of Visit <sup>1</sup>         | Clinic                               | Clinic               | Clinic                        | Clinic                       | Clinic          | Remote           | Clinic           | Clinic           | Remote           | Clinic                    |
| Allowable Window                       |                                      | + < 7 days           |                               | none                         | ±1 day          | ±1 day           | ± 1 day          | ± 3 days         | ± 3 days         | ± 7 days                  |
| Clinic Assessments and Procedures      |                                      |                      |                               |                              |                 |                  |                  |                  |                  |                           |
| Informed Consent                       | ✓                                    |                      |                               |                              |                 |                  |                  |                  |                  |                           |
| Medical History                        | ✓                                    | ✓                    |                               |                              |                 |                  |                  |                  |                  |                           |
| Inclusion/exclusion Criteria           | ✓                                    | ✓                    |                               |                              |                 |                  |                  |                  |                  |                           |
| MINI                                   | ✓                                    |                      |                               |                              |                 |                  |                  |                  |                  |                           |
| HAM-D-17                               | ✓                                    | ✓                    |                               |                              |                 |                  |                  |                  |                  |                           |
| MGH-ATRQ                               | ✓                                    |                      |                               |                              |                 |                  |                  |                  |                  |                           |
| C-SSRS <sup>3</sup> and YMRS           | ✓                                    | ✓                    | ✓                             | ✓                            | ✓               | ✓                | ✓                | ✓                | ✓                | ✓                         |
| Vital signs                            | ✓                                    | ✓                    | ✓ ,                           | ✓                            |                 |                  |                  |                  |                  |                           |
| Weight                                 | ✓                                    |                      |                               |                              |                 |                  |                  |                  |                  |                           |
| ECG                                    | ✓                                    |                      |                               |                              |                 |                  |                  |                  |                  |                           |
| Clinical laboratory tests <sup>4</sup> | ✓                                    |                      |                               |                              |                 |                  |                  |                  |                  |                           |
| Urinalysis <sup>4</sup>                | ✓                                    |                      |                               |                              |                 |                  |                  |                  |                  |                           |
| Urine Drug Screen <sup>4</sup>         | ✓                                    | ✓                    |                               |                              |                 |                  |                  |                  |                  |                           |
| Meet with Study Therapist              | ✓                                    | ✓                    | ✓                             | ✓                            | ✓               |                  | ✓                |                  |                  | ✓                         |

13  
14  
15  
16  
17

|                                                        | ≥3 weeks prior to Psilocybin Session |                      |                               | Time Post Psilocybin Session |                 |                  |                  |                  |                  |                           |
|--------------------------------------------------------|--------------------------------------|----------------------|-------------------------------|------------------------------|-----------------|------------------|------------------|------------------|------------------|---------------------------|
|                                                        | Screen Visit <sup>2</sup><br>Day -21 | Baseline<br>(Day -1) | Psilocybin Session<br>(Day 0) | Day 1                        | Week 1<br>Day 7 | Week 2<br>Day 14 | Week 3<br>Day 21 | Week 6<br>Day 42 | Week 9<br>Day 63 | Week 12<br>Day 84<br>(ET) |
| Visit                                                  | 1                                    | 2                    | 3                             | 4                            | 5               | 6                | 7                | 8                | 9                | 10                        |
| Location of Visit <sup>1</sup>                         | Clinic                               | Clinic               | Clinic                        | Clinic                       | Clinic          | Remote           | Clinic           | Clinic           | Remote           | Clinic                    |
| Allowable Window                                       |                                      | + < 7 days           |                               | none                         | ±1 day          | ±1 day           | ± 1 day          | ± 3 days         | ± 3 days         | ± 7 days                  |
| Urine Pregnancy Test <sup>6</sup>                      | ✓                                    | ✓                    |                               |                              |                 |                  |                  |                  |                  |                           |
| Documentation of Birth Control to be used <sup>7</sup> | ✓                                    |                      |                               |                              |                 |                  |                  |                  |                  |                           |
| Psilocybin dose                                        |                                      |                      | ✓                             |                              |                 |                  |                  |                  |                  |                           |
| Prior/Concomitant Medications                          | ✓                                    | ✓                    | ✓                             | ✓                            | ✓               | ✓                | ✓                | ✓                | ✓                | ✓                         |
| AE/SAE                                                 |                                      |                      | ✓                             | ✓                            | ✓               | ✓                | ✓                | ✓                | ✓                | ✓                         |
| Participant Completed Assessments                      |                                      |                      |                               |                              |                 |                  |                  |                  |                  |                           |
| 5D-ASC                                                 |                                      |                      | ✓ <sup>8</sup>                |                              |                 |                  |                  |                  |                  |                           |
| CEQ                                                    |                                      |                      |                               | ✓                            |                 |                  | ✓                |                  |                  |                           |
| MEQ30                                                  |                                      |                      |                               | ✓                            |                 |                  | ✓                |                  |                  |                           |
| EBI                                                    |                                      |                      |                               | ✓                            |                 |                  |                  |                  |                  |                           |

|                                | ≥3 weeks prior to Psilocybin Session |                      |                               | Time Post Psilocybin Session |                 |                  |                  |                  |                  |                           |
|--------------------------------|--------------------------------------|----------------------|-------------------------------|------------------------------|-----------------|------------------|------------------|------------------|------------------|---------------------------|
|                                | Screen Visit <sup>2</sup><br>Day -21 | Baseline<br>(Day -1) | Psilocybin Session<br>(Day 0) | Day 1                        | Week 1<br>Day 7 | Week 2<br>Day 14 | Week 3<br>Day 21 | Week 6<br>Day 42 | Week 9<br>Day 63 | Week 12<br>Day 84<br>(ET) |
| Visit                          | 1                                    | 2                    | 3                             | 4                            | 5               | 6                | 7                | 8                | 9                | 10                        |
| Location of Visit <sup>1</sup> | Clinic                               | Clinic               | Clinic                        | Clinic                       | Clinic          | Remote           | Clinic           | Clinic           | Remote           | Clinic                    |
| Allowable Window               |                                      | + < 7 days           |                               | none                         | ±1 day          | ±1 day           | ± 1 day          | ± 3 days         | ± 3 days         | ± 7 days                  |
| Q-LES-Q-SF                     |                                      | ✓                    |                               |                              |                 |                  | ✓                |                  |                  | ✓                         |
| GAD-7                          |                                      | ✓                    |                               |                              |                 |                  | ✓                |                  |                  | ✓                         |
| QIDS-SR-16                     | ✓                                    | ✓                    | ✓                             | ✓                            | ✓               | ✓                | ✓                | ✓                | ✓                | ✓                         |
| SDS                            |                                      | ✓                    |                               |                              |                 | ✓                | ✓                |                  |                  | ✓                         |
| WSAS                           |                                      | ✓                    |                               |                              |                 |                  | ✓                |                  |                  | ✓                         |
| MADRS                          |                                      | ✓                    |                               | ✓                            | ✓               | ✓                | ✓                | ✓                | ✓                | ✓                         |

Abbreviations: 5D-ASC, Five Dimension Altered States of Consciousness Questionnaire; AE, adverse event; CEQ, The Challenging Experience Questionnaire; CRP, C-reactive protein; DSM-5

Diagnostic and Statistical Manual of Mental Disorders (5<sup>th</sup> edition); EBI, Emotional Breakthrough Inventory; ECG, electrocardiogram; ET, early termination; GAD-7, Generalized Anxiety Disorder 7; h, hour(s); HAM-D -17, Hamilton Depression Rating Scale; MADRS, Montgomery-Asberg Depression Scale; MEQ30, The Revised Mystical Experience Questionnaire; MGH-ATRQ, Massachusetts General Hospital-Antidepressant Treatment Response Questionnaire; MINI, Mini International Neuropsychiatric Interview; QIDS-SR-16, Quick Inventory of Depressive Symptomatology-Self-rated; Q-LES-Q-SF, Quality of Life Enjoyment and Satisfaction Questionnaire-Short Form; SAE, serious adverse event; SDS, Sheehan Disability Scale; C-SSRS, Columbia-Suicide Severity Rating Scale; UK, United Kingdom; VAS, visual analogue scale; WSAS, Work and Social Adjustment Scale; YMRS, Young Mania Rating Scale.

<sup>1</sup> On site clinic visits; visits allowed remotely will have the MADRS performed by telephone and other assessments will be done electronically.

<sup>2</sup> If additional visits are needed to ensure adequate time for discontinuation of prior antidepressant therapy, visits should occur weekly prior to the psilocybin session (V3). At subsequent screening period visits (V1a, V1b, etc), medications taken and any changes in medications since the previous visit and C-SSRS will be obtained, in addition, to other assessments at the study clinician's discretion. Assessments may be performed over several days, but all scales should be completed on the same day.

<sup>3</sup> The "Baseline/Screening" version will be administered at Screening and the "Since Last Visit" version will be administered at all other visits.

<sup>4</sup> See Section 7.2.4 for complete list of required tests to be performed.

<sup>5</sup> All women.

<sup>6</sup> For women of child-bearing potential only.

20  
21  
22  
23  
24  
25  
26  
27  
28  
29  
30  
31  
32  
33  
34  
35  
36  
37  
38

39 <sup>7</sup> Site is to document method of contraception agreed to be used by each participant.

40 <sup>8</sup> To be administered immediately after the psilocybin session.

41 <sup>9</sup> **Blood pressure will be monitored before discharge.**

42

~~43~~

44 5D-ASC – The Five Dimension Altered States of Consciousness Questionnaire measures the acute drug effects.

45 EBI – The Emotional Breakthrough Inventory is an 8-item brief measure intended to index the degree to which an individual experiences his/her emotion during a psilocybin session. It is a VAS style  
46 scale, typically with units from 0 to 100. It is typically rated within 24 h of a psychedelic experience and ideally within 5 h of the 'end' of the psychedelic experience or once acute drug effects have  
47 significantly subsided.

48 HAM-D-17 – The 17-item Hamilton Depression Rating scale measure the degree of symptom severity in depressed patients.

49 GAD-7 – The Generalized Anxiety Disorder scale is a 7-item participant completed scale to assess anxiety in a participant.

50 MADRS – the Montgomery-Asberg Depression Scale is a clinician rated outcome measure to assess a participant's level of depression.

51 QIDS-SR-16 – Quick Inventory of Depressive Symptomatology scale is a participant-rated scale to assess their depression.

52 SDS – The Sheehan Disability Scale is a patient-reported outcome measure used to assess functional impairment and associated disability.

53 C-SSRS – Columbia-Suicide Severity Rating Scale assesses treatment-emergent suicidal thoughts. This scale should be administered prior to dosing if possible.

54 WSAS – Work and Social Adjustment Scale is a self-report scale used to assess psychosocial functioning and to predict durability of response to antidepressant treatment.

55

56

57

58

59

60

61

62

63

64

65

66

67

68

69

70

71

72

73

74

75

76

77

78

79

80

81

82

83

84

85

86  
87  
88  
89  
90  
91  
92  
93  
94  
95  
96  
97  
98  
99  
100  
101  
102  
103  
104  
105  
106  
107  
108  
109  
110  
111  
112  
113  
114  
115  
116  
117  
118  
119  
120  
121  
122  
123  
124  
125  
126  
127  
128  
129  
130  
131  
132  
133

## 5 POPULATION

### 5.1 Number of Participants

A total of 12 participants are planned to be enrolled in the study.

### 5.2 Inclusion Criteria

Participants meeting all the following inclusion criteria at Screening (V1) should be considered for admission into the study.

1. Signed ICF.
2. 18 years of age or older at Screening (V1); **less than age 65 at Screening**.
3. Must meet DSM-5 criteria for BP-II, depression episode based on medical records, clinical assessment and documented completion of the version 7.0.2 MINI.
4. HAM-D-17 (17-item) score  $\geq 18$  at Screening (V1) and at Baseline (V2). YMRS  $< 10$  at V1 and V2.
5. Failure to respond to an adequate dose and duration of  $\geq 2$  or more pharmacological treatments for the current episode as determined through the MGH-ATRQ and the episode  $> 3$  months and  $< 2$  years. Failure includes inadequate response to an adequate duration and dose or failure to reach an adequate dose and duration due to lack of tolerance. Augmentation with an add on treatment counts as an additional treatment.
6. Have successfully discontinued all serotonergic medications at least 2 weeks prior to Baseline (V2) (see Section 8.5.3).
7. Ability to complete all protocol required assessment tools without any assistance or alteration to the copyrighted assessments, and to comply with all study visits.

### 5.3 Exclusion Criteria

Participants meeting any of the following exclusion criteria at Screening (V1) will not be enrolled in the study.

*Psychiatric Exclusion Criteria:*

1. Current or past history of bipolar I disorder, schizophrenia, psychotic disorder (unless substance induced or due to a medical condition), , delusional disorder, paranoid
-

134 personality disorder, schizoaffective disorder, or borderline personality disorder,  
135 as assessed by a structure clinical interview (version 7.0.2 MINI).  
136

- 137
- 138 2. Current cognitive behavioral therapy (CBT) that will not remain stable for the  
139 duration of the study. CBT cannot be initiated within 21 days of baseline.  
140
  - 141 3. Current (or remission < 1 year) alcohol or drug abuse as defined by DSM-5 at  
142 Screening (V1).  
143
  - 144 4. Significant risk of suicide based on the C-SSRS prior to randomization defined as (a) a  
145 score of “3” or “4” on Questions 2 or 13; or (b) a score of “2” or higher on Questions  
146 1a, 3, 4, 5, 6, 7, 8, 9, 10, 11, 12, or 14 over the past 13 months. Or, if active suicidal  
147 activity or ideation during the current episode, eligibility will be determined at the  
148 investigator’s discretion.  
149
  - 150 5. Depression secondary to other medical conditions.  
151
  - 152 6. Other personal circumstances and behavior judged to be incompatible with  
153 establishment of rapport or safe exposure to psilocybin.  
154

155 *General Medical Exclusion Criteria:*  
156

- 157 8. Women who are pregnant, nursing, or planning a pregnancy. Participants who are  
158 sexually active must agree to use a highly effective contraceptive method (as listed  
159 in Section 8.5.2) throughout their participation in the study. Women of child bearing  
160 potential must have a negative urine pregnancy test at Screening (V1) and Baseline  
161 (V2).  
162
- 163 9. Cardiovascular conditions: recent stroke (< 1 year from signing of ICF), recent  
164 myocardial infarction (< 1 year from signing of ICF), uncontrolled  
165 hypertension (blood pressure > 140/90 mmHg or QTc > 450 msec) or clinically  
166 significant arrhythmia within 1 year of signing the ICF.  
167
- 168 10. Uncontrolled OR insulin-dependent diabetes.  
169
- 170 11. Seizure disorder.  
171
- 172 12. Positive urine drug screen for illegal drugs or drugs of abuse (to include but not  
173 limited to opiates, PCP, cocaine, amphetamines, methamphetamines, barbiturates and  
174 methadone; cannabis for medicinal purposes or recreational use is permitted) at V1  
175 and V2. Any positive urine drug test will be reviewed with participants to determine  
176 the pattern of use and eligibility will be determined at the investigator’s discretion in  
177 conjunction with the study physician.  
178



- 184  
185 13. Current enrollment in any investigational drug or device study or participation in  
186 such within 30 days of Screening (V1).  
187
- 188 14. Current enrollment in an interventional study for depression or participation in  
189 such within 30 days of Screening (V1).  
190
- 191 15. Abnormal and clinically significant results on the physical examination, vital  
192 signs, ECG, or laboratory tests at Screening (V1).  
193
- 194 16. Any other clinically significant cardiovascular, pulmonary, gastrointestinal, hepatic,  
195 renal or any other major concurrent illness that, in the opinion of the investigator,  
196 may interfere with the interpretation of the study results or constitute a health risk  
197 for the participant if he/she takes part in the study.  
198

#### 199 **5.4 Participant Screening** 200

201 Participants will be recruited from general practitioners and specialized psychiatric  
202 services. Those participants considered eligible for the study will be further assessed to  
203 confirm eligibility after the participant has signed an ICF. All participants will then be  
204 seen weekly for at least 3 weeks prior to the Psilocybin Session (V3) to ensure the safe  
205 discontinuation of current antidepressant therapy required by the protocol. Rescreening of  
206 participants considered not eligible for the study will be allowed.  
207

#### 208 **5.5 Deviation from Inclusion/Exclusion Criteria** 209

210 No deviations will be permitted from the Inclusion or Exclusion Criteria.  
211  
212  
213  
214  
215  
216  
217  
218  
219  
220  
221  
222  
223  
224  
225  
226  
227  
228  
229  
230  
231  
232  
233  
234  
235  
236  
237  
238  
239  
240

---

## 6 STUDY CONDUCT

The procedures to be performed throughout the study are outlined in the Schedule of Assessments (Section 4.3). A detailed description of each assessment may be found in Section 6.2.

### 6.1 General Instructions

Participants will be recruited from general practitioners and specialized psychiatric services. Those participants considered eligible for the study will be further assessed to confirm eligibility after the participant has signed an ICF.

### 6.2 Study Procedures by Time Point

#### 6.2.1 Screening Period

The participant will be seen initially to evaluate suitability for the study. All participants will be seen at the clinic weekly for a minimum of 3 weeks prior to psilocybin administration (Psilocybin Session, V3) to ensure safe discontinuation of current antidepressant therapy required by the protocol, and to conduct psychoeducation.

At the initial Screening visit (V1), the following assessments will be performed and recorded. These assessments may be performed over several days, but all scales should be completed on the same day. All clinician or participant-rated assessments throughout the study will be captured electronically.

- ICF
  - Medical history
  - Prior and current medications; the participant will be tapered from prohibited medications (see Section 8.5.3), if any, under the supervision of the study clinician
  - Review of inclusion/exclusion criteria (Section 5)
  - MINI version 7.0.2
  - HAM-D-17
  - MGH-ATRQ
  - YMRS
  - C-SSRS (Last 13 Months)
-

- 293
- 294 ○ QIDS-SR-16
- 295
- 296 ○ Vital signs (ie, sitting blood pressure, pulse, body temperature, and respiratory
- 297 rate)
- 298
- 299 ○ Weight
- 300
- 301 ○ 12-lead ECG
- 302
- 303 ○ Blood and urine samples for:
- 304
  - 305 ▪ Clinical laboratory tests
  - 306
  - 307 ▪ Urinalysis
  - 308
  - 309 ▪ Urine drug screen
  - 310
  - 311 ▪ Urine pregnancy test for all women of childbearing potential
  - 312
- 313 ○ Document contraceptive method to be used by the participant
- 314
- 315 ○ All participants will undergo an in-person preparatory session before
- 316 receiving access to a digital study platform (Longboat) for psychoeducation.
- 317
- 318 ○ All participants will meet with study therapist to begin psychoeducation and
- 319 preparation for their psilocybin experience.
- 320

321 At subsequent screening period visits (V1a, V1b, etc), medications taken and any  
 322 changes in medications since the previous visit, and the C-SSRS will be obtained in  
 323 addition to other assessments at the study clinician's discretion.

### 324 **6.2.2 Baseline Visit – Visit 2 – Day -1**

325

326

327 The Baseline visit (V2) should occur 3 to 6 weeks after initial Screening (V1) + < 7-day  
 328 window. At the Baseline visit (V2), the participant's eligibility will be confirmed by  
 329 reviewing the Inclusion/Exclusion Criteria (Sections 5.2 and 5.3) and updating the  
 330 medical history. If the participant is out of the < 7-day window, all baseline  
 331 assessments are to be repeated, except randomization. The Baseline visit (V2) should  
 332 occur the day before the anticipated psilocybin session. The following procedures will  
 333 be performed and recorded at the Baseline visit (V2):

- 334
- 335 ○ MADRS
- 336
- 337 ○ HAM-D-17
- 338 ○ YMRS
- 339
- 340 ○ C-SSRS (Since Last Visit)
- 341
- 342 ○ SDS
- 343
- 344 ○ GAD-7
- 345
- 346 ○ Q-LES-Q-SF
- 347
- 348 ○ QIDS-SR-16
- 349

- 350 ○ WSAS
- 351
- 352 ○ Vital signs (ie, sitting blood pressure, pulse, body temperature, and respiratory
- 353 rate)
- 354
- 355 ○ Urine samples for:
- 356
  - 357 ▪ Urine drug screen
  - 358
  - 359 ▪ Urine pregnancy test for all women of childbearing potential
  - 360
- 361 ○ Medications taken and any changes in medications since the previous visit.
- 362
- 363 ○ Reviewing the Inclusion/Exclusion Criteria (Sections [5.2](#) and [5.3](#))
- 364

365 If the participant continues to meet the eligibility criteria, the therapist will review the  
366 psychoeducational material and the anticipated psilocybin session with the participant. If  
367 the participant remains eligible, the participant will receive 25mg psilocybin per study  
368 protocol the next day (V3).

---

370  
371  
372  
373  
374  
375  
376  
377  
378  
379  
380  
381  
382  
383  
384  
385  
386  
387  
388  
389  
390  
391  
392  
393  
394  
395  
396  
397  
398  
399  
400  
401  
402  
403  
404  
405  
406  
407  
408  
409  
410  
411  
412  
413  
414  
415  
416  
417  
418  
419  
420  
421  
422  
423

### **6.2.3 Visit 3 – Day 0 – Psilocybin Session (25mg)**

At the psilocybin session (the day of IP administration), the following are to be obtained:

- Vital signs (ie, sitting blood pressure, pulse, body temperature, and respiratory rate)
- Administer IP (Section 8.3). A full description of the activities of the psilocybin session is found in the Study Manual. After the acute effects of the psilocybin pass, participants will be discharged to go home with a chaperone.
- 5D-ASC
- YMRS
- C-SSRS (Since Last Visit)
- QIDS-SR-16
- Medications taken and any changes in medications since the previous visit
- AEs and Serious AEs (SAEs) (Sections 9 and 10).

### **6.2.4 Visit 4 – Day 1 Postdosing**

On the day following IP administration, the participant will return to the study site for a safety check and to discuss their experience during IP during the psilocybin administration session. The following will be obtained at this visit:

- MADRS
- YMRS
- C-SSRS (Since Last Visit)
- Emotional Breakthrough Inventory (EBI)
- QIDS-SR-16
- CEQ
- MEQ30
- Vital signs (ie, sitting blood pressure, pulse, body temperature, and respiratory rate)
- Medications taken and any changes in medications since the previous visit
- AE and SAE (Sections 9 and 10).

Participants will be reminded to remain off any antidepressant medications until after V7.

### **6.2.5 Visit 5 – 1 Week Postdosing**

424 The participant will visit the clinic 1 week (7 days  $\pm$  1 day) following IP administration;  
425 they will meet with the study therapist and the following assessments will be obtained  
426 at this visit:

- 427 ○ MADRS
- 428 ○ YMRS
- 429
- 430 ○ C-SSRS (Since Last Visit)
- 431
- 432 ○ QIDS-SR-16
- 433
- 434 ○ Medications taken and any changes in medications since the previous visit
- 435
- 436 ○ AE and SAE (Sections 9 and 10).
- 437
- 438

439 Participants will be reminded to remain off any antidepressant medications until after V7.

#### 441 **6.2.6 Visit 6 –Week 2 Postdosing**

442  
443 The participant will be contacted by telephone 2 weeks (14 days  $\pm$  1 day)  
444 following IP administration; the following assessments will be obtained at  
445 this visit:

- 446 ○ MADRS
- 447 ○ YMRS
- 448
- 449 ○ C-SSRS (Since Last Visit)
- 450
- 451 ○ SDS
- 452
- 453 ○ QIDS-SR-16
- 454
- 455 ○ Medications taken and any changes in medications since the previous visit
- 456
- 457 ○ AE and SAE (Sections 9 and 10).
- 458
- 459
- 460

461 Participants will be reminded to remain off any antidepressant medications until after V7.

#### 462 **6.2.7 Visit 7 – Week 3 Postdosing**

463  
464 The participant will visit the clinic 3 weeks (21 days  $\pm$  1 day) following IP  
465 administration; they will meet with the study therapist and the following  
466 assessments will be obtained at this visit:

- 467 ○ MADRS
- 468
- 469 ○ YMRS
- 470
- 471 ○ C-SSRS (Since Last Visit)
- 472
- 473 ○ SDS
- 474
- 475 ○ GAD-7
- 476
- 477 ○ Q-LES-Q-SF
- 478
- 479
- 480

- 481 ○ QIDS-SR-16
- 482
- 483 ○ WSAS
- 484
- 485 ○ QIDS-SR-16
- 486
- 487 ○ Medications taken and any changes in medications since the previous visit
- 488
- 489 ○ AE and SAE (Sections 9 and 10).
- 490

### 491 **6.2.8 Visit 8 –6 Weeks Postdosing**

492 The participant will visit the clinic 6 weeks (42 days  $\pm$  3 days) following IP  
493 administration. All clinician or participant-rated assessments throughout the study  
494 will be captured electronically:

- 495 ○ MADRS
- 496 ○ YMRS
- 497
- 498 ○ C-SSRS (Since Last Visit)
- 499
- 500 ○ QIDS-SR-16
- 501
- 502 ○ Medications taken and any changes in medications since the previous visit
- 503
- 504 ○ AE and SAE (Sections 9 and 10).
- 505
- 506
- 507
- 508

### 509 **6.2.9 Visit 9 – 9 Weeks Postdosing**

510 The participant will be contacted by telephone 9 weeks (63 days  $\pm$  3 days) following  
511 IP administration; the following assessments will be obtained:

- 512 ○ Remote-rater MADRS
- 513 ○ YMRS
- 514
- 515 ○ C-SSRS (Since Last Visit)
- 516
- 517 ○ QIDS-SR-16
- 518
- 519 ○ Medications taken and any changes in medications since the previous visit
- 520
- 521 ○ AE and SAE (Sections 9 and 10).
- 522
- 523
- 524
- 525

### 526 **6.2.10 Visit 10 – 12 Weeks Postdosing End of Study**

527 The participant will visit the clinic 12 weeks (84 days  $\pm$  3 days) following IP  
528 administration; they will have a termination meeting with the study therapist and the  
529 following assessments will be obtained:

- 530 ○ MADRS
- 531 ○ YMRS
- 532
- 533 ○ C-SSRS (Since Last Visit)
- 534
- 535 ○ SDS
- 536
- 537

- 538
- 539 ○ GAD-7
- 540
- 541 ○ Q-LES-Q-SF
- 542
- 543 ○ QIDS-SR-16
- 544
- 545 ○ WSAS
- 546
- 547 ○ Medications taken and any changes in medications since the previous visit
- 548
- 549 ○ AEs and SAEs (Sections 9 and 10).
- 550

### 551 **6.3 Premature Discontinuation**

552

553 If the participant's participation in the study is terminated prematurely for any reason,

554 the reason for such Early Termination (ET) should be documented and the V110(EOS)

555 procedures should be performed as noted in Section 6.2.11.

556

557 A termination electronic Case Report Form (CRF) page should be completed for every

558 participant who is randomized, whether the participant completes the study or not. The

559 reason for any ET should be indicated on this form; as much information should be

560 provided as possible. The primary reason for a participant discontinuing early should

561 be selected from the following standard categories of ET:

562

- 563 • *Screen Failure:* Participant does not qualify to participate in the study.
- 564
- 565 • *Lack of efficacy:* Participants who meet the following criteria after the psilocybin
- 566 session will be evaluated by a study clinician, hospitalized if appropriate, and
- 567 treated according to the national standard of care guidelines. They will be followed
- 568 until the end of the study if informed consent is maintained:
- 569
  - 570 a. become suicidal as determined by clinical judgement and/or by C-SSRS as
  - 571 stated in the Exclusion Criteria
  - 572 b. showed scores of MADRS and/or QIDS-SR-16 increased by < 30% between
  - 573 the visits
  - 574 c. showed scores of MADRS and/or QIDS-SR-16 increased by < 30% for 3
  - 575 consecutive visits
  - 576
- 577 • *Adverse Event:* Clinical or laboratory events occurred that, in the medical judgment of
- 578 the investigator for the best interest of the participant, are grounds for discontinuation.
- 579 This includes serious and nonserious AEs regardless of relation to the IP.
- 580
- 581 • *Death:* The participant died.
- 582
- 583 • *Withdrawal of Consent:* The participant or caregiver desired to withdraw from further
- 584 participation in the study in the absence of an investigator-determined medical need
- 585 to withdraw. If the participant gave a reason for withdrawing, it should be recorded in
- 586 the CRF.
- 587
- 588 • *Protocol Violation:* The participant's findings or conduct failed to meet the protocol
- 589 entry criteria or failed to adhere to the protocol requirements (eg, drug
- 590
- 591



592 noncompliance, failure to return for defined number of visits). The violation  
593 necessitated early discontinued from the study.

594

595 • *Lost to Follow-Up*: The participant stopped coming for visits and study personnel  
596 were unable to contact the participant.

597

598 • *Noncompliance*: The participant was noncompliant with study visits or procedures.

599

600 • *Other*: The participant was discontinued for a reason other than those listed  
601 above.

602

603

604

605

606

607

---

608  
610  
611  
612  
613  
614  
615  
616  
617  
618  
619  
620  
621  
622  
623  
624  
625  
626  
627  
628  
629  
630  
631  
632  
633  
634  
635  
636  
637  
638  
639  
640  
641  
642  
643  
644  
645  
646  
647  
648  
649  
650  
651  
652  
653  
654  
655  
656  
657  
658  
659

## 7 DESCRIPTION OF STUDY PROCEDURES

### 7.1 Efficacy Assessments

#### 7.1.1 *Montgomery-Asberg Depression Rating Scale*

MADRS evaluations will be performed at Baseline, Day 1, and Weeks 1, 2, 3, 6, 9, and 12 (V2, V4, V5, V6 V7, V8, V9, and V10, respectively). The MADRS is a clinician-rated scale measuring depression severity, consisting of 10 items, each scored from 0 (normal) to

6 (severe), for a total possible score of 60; higher scores denote greater severity.<sup>24</sup> The structure of the telephone-based interview will be controlled through the use of The Structured Interview Guide for the MADRS (SIGMA),<sup>41</sup> which provides structured probes to ensure standardisation of administration and comprehensive coverage of 10 questions.

#### 7.1.2 *Quick Inventory of Depressive Symptomatology*

The 16-item QIDS-SR-16 a self-rated scale designed to assess the severity of depressive symptoms in the nine diagnostic symptom domains of a major depressive episodes, exclusive of atypical or melancholic symptoms.<sup>29</sup> The QIDS-SR-16 is sensitive to change with various treatments, demonstrating its utility in research settings. The total score ranges from 0 to 27 with 0 representing no depression and 27 representing severe depression. The total score is the sum of the 9 symptom domains. The QIDS-SR-16 will be collected at every clinic visit or contact with the participant.

#### 7.1.3 *Sheehan Disability Scale*

The SDS is a brief, 5-item self-report inventory that assesses functional impairment in work/school, social life, and family life. The total score ranges from 0 to 30 with 0 representing no impairment and 30 representing severe impairment. The last two items of the scale (Days Lost and Days Unproductive) do not count toward the total score. Each domain is rated on a 10 -point visual analogue scale (VAS).<sup>32</sup> The SDS will be obtained at Baseline, and Weeks 3, 6 and 12 (V2, V7, and V10, respectively).

#### 7.1.4 *Generalized Anxiety Disorder scale*

The GAD -7 is useful in primary care and mental health settings as a screening tool and symptom severity measure for the seven most common anxiety disorders.<sup>34</sup> Participants choose one of 4 severity scores associated problems related to the common anxiety disorders and then indicate the degree to which these problems caused functional and/or social difficulties. Scores are determined by calculating the values for each column. A total score is obtained by the sum of all total column values. The GAD-7 will be obtained at Baseline, and Weeks 3 and 12 (V2, V7, and V10, respectively).

---

660  
661  
662 **7.1.5 Quality of Life Enjoyment and Satisfaction Questionnaire-Short Form**  
663 **(Q-LES-Q-SF)**  
664

665 The Quality of Life Enjoyment and Satisfaction Questionnaire (Q-LES-Q) is a self-  
666 report measure designed to enable investigators to easily obtain sensitive measures of  
667 the degree of enjoyment and satisfaction experienced by subjects in various areas of  
668 daily functioning. The summary scores were found to be reliable and valid measures  
669 of these dimensions in a group of depressed outpatients. The Q-LES-Q measures were  
670 related to, but not redundant with, measures of overall severity of illness or severity of  
671 depression within this sample. These findings suggest that the Q-LES-Q measures  
672 may be sensitive to important differences among depressed patients that are not  
673 detected by the measures usually employed.<sup>13</sup>  
674

675 The Q-LES-Q-SF will be administered to the participant and will be obtained at  
676 Baseline, and Weeks 3 and 12 (V2, V7, and V10, respectively).  
677

678 **7.1.6 Work and Social Adjustment Scale**  
679

680 The WSAS is a 5-item self-report scale used to assess psychosocial functioning and to  
681 predict durability of response to antidepressant treatment.<sup>21</sup> Each of the 5 questions is  
682 rated on a scale from 0 to 8, where 0 is no impairment and 8 is very severe impairment. A  
683 WSAS score above 20 appears to suggest moderately severe or worse  
684 psychopathology.<sup>25</sup> Scores between 10 and 20 are associated with significant functional  
685 impairment but less severe clinical symptomatology. Scores below 10 appear to be  
686 associated with subclinical populations.  
687

688 The WSAS will be performed at Baseline and Weeks 3 and 12 (V2, V7, and  
689 V10, respectively), and will be captured electronically.  
690  
691  
692  
693  
694  
695  
696

---

697  
698

699  
700  
701  
702  
703  
704  
705  
706  
707  
708  
709  
710  
711  
712  
713  
714  
715  
716  
717  
718  
719  
720  
721  
722  
723  
724  
725  
726  
727  
728  
729  
730  
731  
732  
733  
734  
735

## **7.2 Safety Assessments**

### **7.2.1 Columbia-Suicide Severity Rating Scale**

The Columbia-Suicide Severity Rating Scale (C-SSRS<sup>31</sup>; Oqendo, MA et al 2003) will be used to detect and measure the current intensity of the patients' specific attitudes, behaviors, and plans to attempt suicide. The C-SSRS will be included at the screening visit, the baseline visit, during all study visits, and in all scheduled follow up phone calls and at end of study for all subjects. Significant risk of suicide based on the C-SSRS defined as answering "YES" to question 4 or 5 for "Suicidal Ideation" [past 1 month] on the Columbia-Suicide Severity Rating Scale, and/or answering "YES" to any question for "Suicidal Behavior" [past 3 months] on the Columbia-Suicide Severity Rating Scale<sup>33</sup>.

### **7.2.2 Young Mania Rating Scale (YMRS)**

The Young Mania Rating Scale is the most often used scale to assess the degree of manic symptoms a patient has (Young et al., 1978)<sup>44</sup>. This scale will be used to screen out patients in mixed or manic states at enrollment and will be used during the trial to assess if the psilocybin treatment may be inducing mania.

### **7.2.3 Vital Signs**

---

Blood pressure (sitting for at least 3 min), respiratory rate, body temperature, and pulse rate will be obtained at Screening, Baseline, Day 0, and Day 1 (V1, V2, V3, and V4, respectively).

736  
737  
738  
739  
740  
741  
742  
743  
744  
745  
746  
747  
748  
749  
750  
751  
752  
753  
754  
755  
756  
757  
758  
759  
760  
761  
762  
763  
764  
765  
766  
767  
768  
769  
770  
771  
772  
~~773~~  
774  
775  
776  
777  
778  
779  
780

#### **7.2.4      *Electrocardiogram***

Standard 12-lead ECGs will be obtained at Screening (V1).

#### **7.2.5      *Clinical Laboratory Tests***

Blood samples will be obtained at Screening (V1), Day 1 for the following:

- *Hematology*: hemoglobin, hematocrit, red blood cell count, mean corpuscular hemoglobin, mean corpuscular volume, mean corpuscular hemoglobin concentration, white blood cell count (with differential), and platelet count.
- *Chemistry*: albumin, alkaline phosphatase, alanine aminotransferase (ALT), amylase, aspartate aminotransferase (AST), bicarbonate, bilirubin (direct, indirect, and total), calcium, chloride, creatine kinase, creatinine, gamma GT, glucose, lactate dehydrogenase, lipase, magnesium, phosphate, potassium, protein-total, sodium, urea (blood urea nitrogen), and uric acid.

Urine samples will be obtained at Screening (V1) and Baseline (V2) for the following:

- *Urinalysis*: A dipstick urinalysis will be performed for blood, glucose, ketone, protein, pH, specific gravity, nitrite, leukocytes, bilirubin, and urobilinogen only at Screening (V1).
- *Urine Drug Screen*: for illicit drugs or drugs of abuse at Screening (V1) and Baseline (V2). Results of a positive drug screen will be reviewed by the study clinician for pattern of use.
- *Urine Pregnancy Test*: a dipstick test in women of childbearing potential at Screening (V1) and Baseline (V2).

Laboratory samples will be analyzed locally.

In the event of an unexplained clinically significant abnormal laboratory test value, the test should be repeated and followed up until it has returned to the normal range and/or an adequate explanation of the abnormality is found.

---

781  
782  
783  
784  
785  
786  
787  
788  
789  
790  
791  
792  
793  
794  
795  
796  
797  
798  
799  
800  
801  
802  
803  
804  
805  
806  
807  
808  
809  
810  
811  
812  
813  
814  
815  
816  
817  
818  
819  
820  
821  
822  
823  
824  
825  
826  
827  
828  
829  
830  
831  
832

## **7.2.6 Adverse Events**

All AEs occurring after the participant signs the ICF and up to the last study event will be recorded. Any AEs occurring before the start of treatment (ie, before the dose of the IP on Day 0 [V3]) will be recorded in the medical history. Any AE ongoing at V10 (EOS/ET) will be followed until resolution or no longer considered clinically significant by the investigator.

See Section 9 and 10 for additional information.

## **7.3 Other Assessment Instruments**

### **7.3.1 Hamilton Depression Rating Scale – 17-item**

The HAM -D-17 17-item scale is used to measure the degree of symptom severity in depressed patients.<sup>16</sup> The HAM-D -17 rating will be performed by the investigator using the eCOA device at the Screening (V1) and Baseline (V2) only. The total score from this assessment will be used as eligibility criteria prior to treatment (minimal total symptom score  $\geq 18$ ). The Structured Interview Guide for the HAM-D-17 (SIGH-D) will be administered.<sup>40</sup>

### **7.3.2 Mini International Neuropsychiatric Interview**

The MINI was designed as a brief structured interview for the major Axis I psychiatric disorders in DSM-5 and International Classification of Diseases-10. Validation and reliability studies have been done comparing the MINI to the Structured Clinical Interview for DMS-5 Patient Edition and the Composite International Diagnostic Interview (a structured interview developed by the World Health Organization). Version 7.0.2 of the MINI will be used for this study. The results of these studies show that the MINI has similar reliability and validity properties, but can be administered in a much shorter period (mean  $18.7 \pm 11.6$  min, median 15 min) than the above referenced instruments. It can be used by clinicians after a brief training session.<sup>33</sup> At Screening (V1), participants will be assessed for BP-II, as documented by DSM - 5 criteria, and the lack of other psychiatric diagnoses will be confirmed by use of the MINI.<sup>33</sup>

### **7.3.3 Massachusetts General Hospital-Antidepressant Treatment History Questionnaire**

The MGH-ATRQ is a self-rated scale used to determine treatment resistance in major depressive disorder.<sup>7</sup> The scale examines the efficacy (improvement from 0%, not improved at all to 100% completely improved, and adequacy of a treatment. Participants are asked by clinician about treatment adherence to each medication trial and examines the participants' antidepressant history to identify pseudo-resistance and treatment resistance. The MGH-ATRQ will be collected at Screening (V1) only.

833  
834  
835  
836  
837  
838  
839  
840  
841  
842  
843  
844  
845  
846  
847  
848  
849  
850  
851  
852  
853  
854  
855  
856  
857  
858  
859  
860  
861  
862  
863  
864  
865  
866  
867  
868  
869  
870  
871  
872  
873  
874  
875  
876  
877  
878  
879  
880  
881  
882  
883  
884  
885

### **7.3.4 The Challenging Experience Questionnaire**

Acute adverse psychological reactions to classic hallucinogens (“bad trips” or “challenging experiences”), while usually benign with proper screening, preparation, and support in controlled settings, remain a safety concern in uncontrolled settings (such as illicit use contexts). Anecdotal and case reports suggest potential adverse acute symptoms including affective (panic, depressed mood), cognitive (confusion, feelings of losing sanity), and somatic (nausea, heart palpitation) symptoms. Responses to items from several hallucinogen-sensitive questionnaires (Hallucinogen Rating Scale, the States of Consciousness Questionnaire, and the Five-Dimensional Altered States of Consciousness questionnaire) in an Internet survey of challenging experiences with the classic hallucinogen psilocybin were used to construct and validate a Challenging Experience Questionnaire. The stand-alone CEQ was then validated in a separate sample. Seven CEQ factors (grief, fear, death, insanity, isolation, physical distress, and paranoia) provide a phenomenological profile of challenging aspects of experiences with psilocybin. Factor scores were associated with difficulty, meaningfulness, spiritual significance, and change in well-being attributed to the challenging experiences. The factor structure did not differ based on gender or prior struggle with anxiety or depression. The CEQ provides a basis for future investigation of predictors and outcomes of challenging experiences with classic hallucinogens.<sup>3</sup> The CEQ will be administered the day after the psilocybin session on day 1 (V4) and 2 weeks after the psilocybin session on day 14 (V6).

### **7.3.5 The Revised Mystical Experience Questionnaire**

The 30-item revised Mystical Experience Questionnaire (MEQ30) was previously developed within an online survey of mystical-type experiences occasioned by psilocybin-containing mushrooms. The rated experiences occurred on average eight years before completion of the questionnaire. The current paper validates the MEQ30 using data from experimental studies with controlled doses of psilocybin. Data were pooled and analyzed from five laboratory experiments in which participants ( $n=184$ ) received a moderate to high oral dose of psilocybin (at least 20 mg/70 kg). Results of confirmatory factor analysis demonstrate the reliability and internal validity of the MEQ30. Structural equation models demonstrate the external and convergent validity of the MEQ30 by showing that latent variable scores on the MEQ30 positively predict persisting change in attitudes, behavior, and well-being attributed to experiences with psilocybin while controlling for the contribution of the participant-rated intensity of drug effects. These findings support the use of the MEQ30 as an efficient measure of individual mystical experiences. A method to score a “complete mystical experience” that was used in previous versions of the mystical experience questionnaire is validated in the MEQ30, and a stand-alone version of the MEQ30 is provided for use in future research.<sup>2</sup> The MEQ30 will be administered the day after the psilocybin session on day 1 (V4) and 2 weeks after the psilocybin session on day 14 (V6).

### **7.3.6 Five Dimension Altered States of Consciousness Questionnaire**

The 5D-ASC measures the acute drug effects using 5 primary dimensions and respective subdimensions to assess alterations in mood, perception, and experience of self in relation to environment and thought disorder. The 5 dimensions include *oceanic boundlessness*, *anxious ego dissolution*, *visionary restructuralization*, *auditory alterations*, and *reduction of vigilance*.<sup>9,10,35</sup> This will be administered immediately after the psilocybin session on Day 0 (V3).

886  
887  
888  
889  
890  
891  
892  
893  
894  
895  
896  
897  
898  
899  
900  
901  
902  
903  
904  
905  
906  
907  
908  
909  
910  
911  
912  
913  
914  
915  
916  
917  
918  
919  
920  
921  
922  
923  
924  
925  
926  
927  
928  
929  
930  
931  
932  
933  
934  
935  
936  
937  
938

### **7.3.7 Emotional Breakthrough Inventory**

The EBI is a VAS that describes the intensity and quality of the emotional experience following the psilocybin session, developed by the Imperial College London. This is collected on Day 1 (V4) electronically.

### **7.4 Protocol Deviations**

All protocol deviations will be assessed and documented on a case-by-case basis before the database lock, and deviations considered having a serious impact on the efficacy results will be reported in the scientific publication resulting from this study.

Protocol deviations will be summarized by center and grouped into different categories, as follows:

- those who entered the study even though they did not satisfy the entry criteria;
  - those who developed withdrawal criteria during the study but were not withdrawn;
  - those who received the wrong treatment or incorrect dose;
  - those who took any prohibited medications during the study.
-



## 8 INVESTIGATIONAL PRODUCT (IP) MANAGEMENT

### 8.1 Description

Information about the IP is provided in [Table 8.1](#).

**Table 8.1 Details of Investigational Product**

|              | <b>Psilocybin</b>                                                                                        |
|--------------|----------------------------------------------------------------------------------------------------------|
| Ingredient   | Psilocybin                                                                                               |
| Manufacturer | Juniper Pharma Services Ltd,<br>8 Orchard Place,<br>Nottingham Business Park,<br>Nottingham, NG8 6PX, UK |
| Dose         | 25 mg                                                                                                    |
| Route        | Oral                                                                                                     |
| Formulation  | Capsule                                                                                                  |
| Strength(s)  | 5 mg                                                                                                     |

#### 8.1.1 Formulation

Matching psilocybin capsules, 5 mg, are manufactured by Juniper Pharma Services, Ltd.

#### 8.1.2 Storage

No pharmacy involvement is planned. All IP will be kept in a medication room under a triple lock system. There will be limited access to the IP: only the PI, Sub-I(s) and study coordinators will have access to the IP. The Sub-I (s) will be licensed psychiatrists credentialed through the Sheppard Pratt Physicians PA (SPPPA).

The high-density polyethylene (HDPE) bottles of IP are to be stored as indicated in the Study Manual. Deviations of storage temperature outside this required range should be documented. Bottle of IP should not be frozen. If any component of the IP is damaged, the site PI must be notified as soon as possible to request replacement.

### 8.2 Packaging

Psilocybin capsules are packaged into HDPE containers with child-resistant, tamper-evident screw cap lids with a mounted desiccant by Fisher Clinical Services UK Ltd (Langhurstwood Road, Horsham, West Sussex, RH12 4QD, UK). Labeling of the IP will also be done by Fisher. Each bottle contains 5 capsules for a single dose administration. Labels are affixed on to the bottles consistent with regulations in participating countries. Single individual bottles will be provided for use by a given participant.

979  
980  
981  
982  
983  
984  
985  
986  
987  
988  
989  
990  
991  
992  
993  
994  
995  
996  
997  
998  
999  
1000  
1001  
1002  
1003  
1004  
1005  
1006  
1007  
1008  
1009  
1010  
1011  
1012  
1013  
1014  
1015  
1016  
1017  
1018  
1019  
1020  
1021  
1022  
1023  
1024  
1025  
1026  
1027  
1028  
1029  
1030  
1031  
1032  
1033  
1034  
1035

## 8.3 Dose and Administration – see below

### 8.3.1 Goals

The psychotherapeutic goals of the psilocybin session are to:

- Ensure psychological safety essential for optimal clinical efficacy
  - Allow participant’s subjective experience to unfold naturally within the boundaries of the therapeutic intention set at the preparation
- 
- Maintain participant ’s attention and awareness on the experience of the present moment thus allowing exposure and processing of the challenging emotional states and memories
  - Generation of insights and solutions for the resolution of challenging personal situations, conflicts and traumatic experiences

### 8.3.2 Methods

Psychotherapeutic methods of the psilocybin session have the following objectives:

- Psychological safety: effective management of anxiety is essential to safety, tolerability and efficacy of psilocybin.
- It has also been shown in previous studies that severe prolonged anxiety in the beginning of the experience could adversely affect the efficacy of psilocybin, therefore the management of anxiety during the onset of the session is an essential skill of psilocybin therapists. Anxiety during the onset of action is not uncommon, and the therapists are specially trained to recognize and actively manage participants through such periods of anxiety until the subject is comfortable enough to continue on their own. Planning two dose sessions with the first at a lower dose has been found helpful. The examples of such active guiding may include saying:
  - *Remember you enrolled in the study of psilocybin for treatment of your depression. As psilocybin takes effect, some anxiety and fear are expected. It is part of the process. Remember we practice relaxation and breathing experiences for situations like this?*
  - *Let’s take deep breaths together and focus on the sensations of the breath throughout the body. As you do this, pay attention to the rhythm of your breath and watch it becoming deeper and slower. Let go of muscle tension with every exhalation.*

Therapists are asked to validate the feeling of anxiety without providing interpretations of perceptual disturbances or guiding participants towards a particular image or memory, other than encouraging them to stay relaxed and open to the emergent experiences.

In the modern research setting, any anxiety during the onset of psilocybin action responded well to reassurance and meditation.

1036  
 1037  
 1038  
 1039  
 1040  
 1041  
 1042  
 1043  
 1044  
 1045  
 1046  
 1047  
 1048  
 1049  
 1050  
 1051  
 1052  
 1053  
 1054  
 1055  
 1056  
 1057  
 1058  
 1059  
 1060  
 1061  
 1062  
 1063  
 1064  
 1065  
 1066  
 1067  
 1068  
 1069  
 1070  
 1071  
 1072  
 1073  
 1074  
 1075  
 1076  
 1077  
 1078  
 1079  
 1080  
 1081  
 1082  
 1083  
 1084  
 1085  
 1086  
 1087

- Self-directed Enquiry and Experiential Processing

In preparation for the psilocybin session, therapists demonstrate and practice skills of self-directed inquiry and experiential processing with participants. Participants are encouraged to face and explore their experience, including the challenging ones. During the peak and later stages of the session, self-directed inquiry and experiential processing become essential for participants to develop a different perspective on their personal challenges and conflicts, and to generate their own solutions. Such self-generated insights are not only therapeutic because of the emotional resolution, but also empowering to participants. This approach is used in MDMA-assisted psychotherapy for treatment of PTSD and is particularly helpful in the event of emergent traumatic memories.

### **8.3.3 Structure of the Psilocybin Session**

In preparation for dosing on Day 0 (V3), after it is confirmed at Baseline (V2) the participant remains eligible to participate in the study they will receive:

- Dosing session 25-mg treatment bottle: 5 × 5-mg capsules

The psilocybin session is supported by two trained mental health clinicians at least one at a doctoral level (the other may be at a masters level) or similar degrees of experience such as an M.D., psychiatrist. Additionally, the study psychiatrist will be in the immediate vicinity of the session to respond to any emergencies.

On the day of the session, participants come in early in the morning with the goal to take the IP around 9 am.

Prior to dose administration, a team of psychotherapists will review the rules and structure of the session with the participant again. Once all the questions are answered, and the participant reconfirms their consent for the session, they will be administered the IP (5 capsules) with a full glass of water. Delaying the intake of IP may induce unnecessary anxiety in participants, therefore it is recommended to have the treatment room prepared for the start of the session before participant's arrival.

The treatment rooms in all trial sites are furnished in soft furniture in muted colors to create a non-clinical calming feel. All treatment rooms are equipped with a high-resolution sound system that allows for simultaneous ambient and earphone listening. The playlist is designed jointly with experts from Johns Hopkins University and the Imperial College London to provide nonverbal guidance. This is the same playlist being used in the Compass Pathways FDA-approved Phase II-b study.

---

1088  
1089  
1090  
1091  
1092  
1093  
1094  
1095  
1096  
1097  
1098  
1099  
1100  
1101  
1102  
1103  
1104  
1105  
1106  
1107  
1108  
1109  
1110  
1111  
1112  
1113  
1114  
1115  
1116  
1117  
1118  
1119  
1120  
1121  
1122  
1123  
1124  
1125  
1126  
1127  
1128  
1129  
1130  
1131  
1132  
1133  
~~1134~~  
1135  
1136  
1137  
1138

Participants will then be encouraged to lie down, practice relaxation and breathing exercises, and listen to calming music. Therapists might want to revisit the intention for the treatment session with the participant and again, ask the question “*What would it look and feel like to be free of depression?*” Such revisions immediately prior to the session provide an implicit direction for the subjective experience during the psilocybin session.

Once the effects of psilocybin become noticeable, participants are encouraged to put on eyeshades and earphones and focus on their internal experience.

Psychotherapists will sit on both sides of the patient’s couch. Psychotherapists are discouraged from reading, using laptops or phones, eating or drinking other than water during the first 2-3 hours of the session.

If adequately prepared, participants should tolerate the onset well using the skills practiced during preparation period. Psychotherapists offer support in the form of reminders, encouragement, grounding hand holding, or active guiding, should the challenging experiences arise. The best ways for support, and boundaries of physical touch are discussed and practiced during the preparation. In general, therapists are instructed to provide therapeutic grounding above shoulder level only. In case of participants with a history of physical and sexual abuse, therapeutic touch should be limited to hand and forearm areas only, or to the form of physical support that was agreed to during preparation.

Therapists are also trained in the skill of recognizing when to allow the participant’s experience to unfold naturally. During the peak experience, especially in the case of non-dual or full ego-dissolution experience, participants are usually silent and may appear comfortable, even blissful. In such cases, no active guiding is needed.

As the drug effects start to subside, participants again might become engaged with emergent narratives.

In case of prolonged anxiety or distress, therapists may choose to actively guide participants through such experiences without interpreting or judging the experiences or giving advice. Once participants are comfortable, they are encouraged again to engage in introspection.

At the end of the session and after the effects of IP are no longer evident, participants become more talkative and interactive. The role of the therapists now is to ensure that experiential processing is complete with some emotional resolution. In those cases where there is still anxiety or despair at the end of the session, participants are encouraged to relax and reflect for a longer period of time. The provisions are made for therapists to stay with the participant until the effects of the drug have fully subsided, and participant is assessed to be comfortable and fully sober. This is assessed through engaging in ‘small talk’ about non-contentious topics unrelated to the content of the session. The therapist might for example ask:

---

1139  
 1140  
 1141  
 1142  
 1143  
 1144  
 1145  
 1146  
 1147  
 1148  
 1149  
 1150  
 1151  
 1152  
 1153  
 1154  
 1155  
 1156  
 1157  
 1158  
 1159  
 1160  
 1161  
 1162  
 1163  
 1164  
 1165  
 1166  
 1167  
 1168  
 1169  
 1170  
 1171  
 1172  
 1173  
 1174  
 1175  
 1176  
 1177  
 1178  
 1179  
 1180  
 1181  
 1182  
 1183  
 1184  
 1185  
 1186  
 1187  
 1188  
 1189  
 1190  
 1191

- *It is almost 6 o'clock. What do you normally do at this time of the day?*
- *What do you usually have for dinner?*
- *What do you like to cook?*

Participants and therapists are discouraged to discuss the content of the session until the next day to avoid premature consolidation of the insights.

At the end of the session, therapists and participants might have a light meal together to mark the closure of the session. Participant's family or friends might also be invited to join the meal if participant consents.

After the safety assessments, participants will be discharged in the care of a family member or a friend. Please refer to the section of safety for more detailed information on discharge assessments and unexpected adverse events.

### **8.3.4 Before the Session**

On the day of the psilocybin session, the participant arrives at the clinical center between 8AM and 9AM. It is essential for the therapist and the supportive assistant (the therapeutic team) to prepare the room and take care of all the logistics prior to the participant's arrival.

The therapist and assistant should welcome the participant shortly following his/her arrival and allow for the expression of any questions or concerns. Since participants are likely to be at least mildly anxious, it is important to validate their anxiety and assure them it is common to be anxious prior to a new experience. The time following arrival and prior to entering the treatment room should be as minimal as possible, as "waiting outside" (even if reading a book) tends to increase anxiety.

The behavioral rules are reviewed again. The participant should reconfirm that he/she:

- Will stay in the room for the duration of the session, except for requested bathroom breaks.
- Will follow the therapist's instructions as all directions are given entirely to ensure their safety.
- Have an accurate mutual understanding of ways the therapist can provide support during the session, including interpersonal grounding, guided imagery and breathing exercises.

Key components of mental set/intention are also reviewed:

- Every experience is welcome; nothing to censor or avoid.
-

1192  
 1193  
 1194  
 1195  
 1196  
 1197  
 1198  
 1199  
 1200  
 1201  
 1202  
 1203  
 1204  
 1205  
 1206  
 1207  
 1208  
 1209  
 1210  
 1211  
 1212  
 1213  
 1214  
 1215  
 1216  
 1217  
 1218  
 1219  
 1220  
 1221  
 1222  
 1223  
 1224  
 1225  
 1226  
 1227  
 1228  
 1229  
 1230  
 1231  
 1232  
 1233  
 1234  
 1235  
 1236  
 1237  
 1238  
 1239  
 1240  
 1241  
 1242

- Face anything that looks potentially frightening as rapidly and openly as possible.
- Reach out for grounding, support or sharing at any time.
- Remember key instructions: Trust, Let Go, Be Open.
- Remember to breathe deeply if needed.
- You'll never be left alone.
- No need to entertain the therapist/assistant.
- This is your day. We're with you, whether you need us or not.

Once all the agreements are reconfirmed and the participant is settled in the treatment room, the therapeutic team offers 5 capsules of the IP with a full glass of water. After the participant takes the capsules and drinks all the water, he/she should settle back on the couch, listen to the music, focus on his/her breathing and relax. This is often when the participant may share photographs or meaningful objects he/she has brought, or when he/she may leaf through an art book—often with the therapist and assistant sitting on both sides of the participant on the couch. As the initial effects of psilocybin are beginning or about to begin, a final trip to the bathroom is offered before the participant reclines and accepts the eyeshade and headphones.

Before the drug's effects begin, it is helpful to re-establish the participant's stated goals for the treatment and to revisit the question: "What does feeling better or recovery feel like?" The participant is reminded that their primary task during this session is to simply collect new and interesting experiences which can then be discussed with the therapist during the integration phase. The therapist can remind the participant of the purpose of the psilocybin therapy and the role of experiential processing, namely allowing the participant to be open and curious to whatever arises and encountering thoughts and feelings previously unknown to them. It should be emphasized that this process inherently requires letting go and a willing passivity to the psychedelic experience; the willingness to let go is correlated with better outcomes in psilocybin therapy.<sup>6</sup> The therapist should remind the participant that the therapeutic team will be supporting them at all times.

Participants are encouraged to relax and focus on internal experience, but are allowed to move around, sit up, talk, and stretch as needed. Occasionally participants may feel the need to move around or express their emotions physically. All expressions, including physical expressions are encouraged.

---

1243  
 1244  
 1245  
 1246  
 1247  
 1248  
 1249  
 1250  
 1251  
 1252  
 1253  
 1254  
 1255  
 1256  
 1257  
 1258  
 1259  
 1260  
 1261  
 1262  
 1263  
 1264  
 1265  
 1266  
 1267  
 1268  
 1269  
 1270  
 1271  
 1272  
 1273  
 1274  
 1275  
 1276  
 1277  
 1278  
 1279  
 1280  
 1281  
 1282  
 1283  
 1284  
 1285  
 1286  
 1287  
 1288  
 1289  
 1290

### **8.3.5 Onset of Action**

#### **8.3.5.1 Setting and Music**

A standardized playlist is employed in all sessions. It begins with soft background music before the participant enters the room and continues through the various phases of a typical high-dose session. It may include some periods of silence. In intense sessions, the choice of music rarely appears to influence experiential content, but it can provide strong nonverbal support and engagement with unfolding inner content unique to each participant. In the latter two hours of a psilocybin session, most any music can be appreciated and explored. The participant is instructed to accept and explore the music as the day progresses, irrespective of their usual personal preferences or current emotional responses. Criticizing and trying to control the music has often been found to be a symptom of resistance to unfolding content. Therapists may choose to deviate from the playlist in highly unusual situations but allowing the standardized playlist to unfold generally proves effective and frees the therapist to focus on the participant. The playlist is skillfully designed to provide variety in a context of accumulated experience with many different persons undergoing psychedelic therapy.

#### **8.3.5.2 Managing Anxiety**

Transient anxiety is often reported as participants encounter changing psychological content. Such anxiety might be viewed as natural and even necessary. It can manifest in different ways, ranging from mild intractability and avoidance of the emerging experiences to extreme paranoia. In most cases, anxiety resolves on its own accord and can be minimized with skillful interpersonal support. Psilocybin provides a unique opportunity for a participant to normalize anxiety and view it as excitement and experience the encounter with honest ambivalence.

During the acute onset of action, the participant might experience perceptual changes in visual, auditory or olfactory modes, and a range of unusual physical sensations. These experiences could be anxiety-provoking, particularly in psychedelically naïve participants. During preparation, the therapist encourages the participant to become curious about these experiences and to freely explore them. If the participant continues to manifest anxiety and emotional distress, the therapist may offer therapeutic touch or interpersonal grounding, if that is something the participant has agreed to during preparation and has been rehearsed.

*“I want to state again my commitment to be here for you. I will do whatever is necessary to make this a safe place for you so that you can fully experience whatever comes up. If what comes up is difficult, I’d like you to try and stay with it and explore it as much as you can. Please ask me for whatever you need.”*

---

1291  
 1292  
 1293  
 1294  
 1295  
 1296  
 1297  
 1298  
 1299  
 1300  
 1301  
 1302  
 1303  
 1304  
 1305  
 1306  
 1307  
 1308  
 1309  
 1310  
 1311  
 1312  
 1313  
 1314  
 1315  
 1316  
 1317  
 1318  
 1319  
 1320  
 1321  
 1322  
 1323  
 1324  
 1325  
 1326  
 1327  
 1328  
 1329  
 1330  
 1331  
 1332  
 1333  
 1334  
 1335  
 1336  
 1337  
 1338  
 1339  
 1340  
 1341

If the participant is agitated and/or frightened, simple reminders could be helpful:

*“You remember that you are participating in a clinical trial of a new medication for your depression. During preparation, we talked about possible anxiety, unusual sensations and intense emotions. This is simply the drug taking effect. It is safe; you will not be harmed. These challenging experiences pass by very quickly if you relax and just watch them. You will return to everyday reality as the effect of psilocybin wanes.”*

The therapist encourages the participant to focus inwards and fully immerse him/herself in all aspects of the experience. The participant may want to practice guided imagery or breathing relaxation techniques in preparation. Please see the scripts for guided imagery, breathing exercise and ‘raisin meditation’ in the study manual.

### **8.3.5.3      *Managing Distractions and Avoidance***

Occasionally, the participant will try to avoid emerging experiences or distract him/herself while trying to regain cognitive control over the unusual state of their mind. The therapist must recognize that such distractions could take different forms. The participant might want to engage in a conversation or prematurely describe in detail their experience, visions or insights. When this occurs, the therapist and assistant aim to remain as silent as possible, thereby enabling the participant and his/her inner experience to direct the course of the psilocybin session. Active listening skills may be required if the participant engages the therapist in conversation; this should be paired with prompts to encourage the participant to continue focusing attention on present experiences. Here the therapist does not add any new information or even words, but still acknowledges the participant.

*Participant: “Yeah, everything has this shiny quality to it, like it’s made of this otherworldly metal.”*

*Therapist: “I wonder if you could stay with that otherworldly experience and see where it takes you.”*

And if the participant continues to engage in the conversation, the therapist can say:

*Therapist: “Perhaps you can focus attention to the details so that we can talk about it later. If you talk about this now, you will be less able to focus on the experience and might miss important details.”*

Here the therapist again acknowledges the participant’s comment without introducing new topics. Then the therapist guides the participant back to his/her present experience.

---



1342  
 1343  
 1344  
 1345  
 1346  
 1347  
 1348  
 1349  
 1350  
 1351  
 1352  
 1353  
 1354  
 1355  
 1356  
 1357  
 1358  
 1359  
 1360  
 1361  
 1362  
 1363  
 1364  
 1365  
 1366  
 1367  
 1368  
 1369  
 1370  
 1371  
 1372  
 1373  
 1374  
 1375  
 1376  
 1377  
 1378  
 1379  
 1380  
 1381  
 1382  
 1383  
 1384  
 1385  
 1386  
 1387  
 1388  
 1389  
 1390  
 1391  
 1392  
 1393  
 1394

Sometimes a participant might ask to go to the bathroom or have a drink of water. The sudden and urgent character of such requests might suggest that they are really trying to avoid emerging material. In such cases, the therapist might suggest:

*“We will take a bathroom break at the end of this piece of music.”*

*“I will get you water in a little while. Why don’t you put the eye shades back on and relax for a few minutes?”*

If a participant is trying to avoid a difficult experience, they might listen to the suggestion and relax.

#### **8.3.5.4 Challenging Shifts versus Adverse Events**

Emotions and feelings can shift quickly during psilocybin experiences. Such shifts must be differentiated from distress that requires active guidance. It is essential that the therapist use his/her clinical judgment to establish whether the participant is in need of the therapist’s quiet and non-intrusive presence, or active guidance. During preparation, the participant has been informed that they can ask for support from the therapist for any reason at any time, especially when they do not feel able to navigate through a particular experiential sequence.

Support can be in the form of therapeutic touch, verbal reassurance, guided imagery or a breathing exercise. It is advisable to apply one technique at a time to allow for minimal intervention and interference with the participant’s unique process. In the preparatory session, the therapist and participant may have discussed the most helpful ways to support in case of emotional distress. It might be useful to remind the participant about this conversation:

*“You remember I told you that anxiety is to be expected and we have agreed that I may support you though physical grounding. If you feel anxious, please reach out for my hand or let me know what else might help you.”*

Or:

*Participant:* “The negative feelings are getting really overwhelming now”

*Therapist:* “Do you remember the conversation we had about negative experiences?”

*Participant:* “Yeah. You suggested I should sit with them.”

*Therapist:* “How does that sound to you?”

*Participant:* “It’s going to be difficult, but I’ll try. If I can’t, can you help me?”

---

1395  
 1396  
 1397  
 1398  
 1399  
 1400  
 1401  
 1402  
 1403  
 1404  
 1405  
 1406  
 1407  
 1408  
 1409  
 1410  
 1411  
 1412  
 1413  
 1414  
 1415  
 1416  
 1417  
 1418  
 1419  
 1420  
 1421  
 1422  
 1423  
 1424  
 1425  
 1426  
 1427  
 1428  
 1429  
 1430  
 1431  
 1432  
 1433  
 1434  
 1435  
 1436  
 1437  
 1438  
 1439  
 1440  
 1441  
 1442  
 1443  
 1444  
 1445  
 1446

*Therapist:* “Yes I’ll do all I can to help you. I’d like you to tune out and just stay focused on what you’re feeling right now.”

*Participant:* “Okay, I’m doing that. It doesn’t feel good.”

*Therapist:* “As you focus on it, are you feeling it altering or changing in any way?”

*Participant:* “It feels like it’s coming and going.”

*Therapist:* “How do you feel about that?”

*Participant:* “It’s difficult.”

*Therapist:* “What’s making it difficult?”

*Participant:* “I’m not sure.”

*Therapist:* “Would it be helpful if I held your arm?”

*Participant:* “Yes, I think that would help.”

As soon as the participant is comfortable, the therapist should encourage him/her to return to further exploration. Remind the participant that you will be there if needed and that there will be a chance during integration to talk through the experience.

Therapists may talk with clinicians/therapists and may coordinate psychotherapy outside the trial. Information should be provided regarding the integration of the psilocybin session with any psychotherapy the participant is currently receiving (and will continue to receive throughout the duration of the study and cannot have been initiated within 21 days of baseline).

### **8.3.6      *Emergency Protocol***

The general principle is that if the participant cannot be calmed down through all the available methods, and is presenting a current threat to him/herself or others, the first choice of medical treatment is oral benzodiazepines. The participant should be made safe in the least invasive and distressing way possible. Note, however, that in research with psilocybin in different university settings over almost two decades, there has never been a need for rescue medications. The psychiatrist will be available to speak with the participant and provide further assessment. A decision will be made by the study clinician with the subject a week before dosing as to whether to have a patient supplied benzodiazepine emergency dose available at the time of dosing.

### **8.3.7      *Peak Experience***

With adequate dosage and an acute onset of action, a ‘peak’ experience may occur about 60-90 minutes after ingestion. Factors that influence the quality and intensity

---

1447  
 1448 of peak experiences include the participant's ability to stay with whatever arises in  
 1449 awareness, their ability to relax and let go of expectations and fears, , etc.  
 1450

1451 Non-dual experiences have been shown to positively correlate with the magnitude and  
 1452 durability of the clinical response, so this state needs to be attended with care. The goal  
 1453 of the therapist is to encourage and support the participant in being fully present and  
 1454 relaxed in this state. Verbal communication should be minimal.  
 1455

1456 Participants who reach peak experience tend to be quiet; even non-responsive. In the  
 1457 unlikely event that a participant would express a need to prematurely attempt to share  
 1458 such an experience, it should be viewed as distraction or avoidance. The therapist needs  
 1459 to encourage the participant to stay quiet and focus on the sensations, insights and  
 1460 feelings, and to collect as many details about the experience as possible so as to be able  
 1461 to relate the story later. However, in true ego-loss and non-dual experiences, there is no  
 1462 ego present. When recalled in memory, participants usually claim such states to be  
 1463 beyond language.  
 1464

1465 Transcendent non-dual experiences are frequent There may be perceptions that extend  
 1466 well beyond the usual sense of self, such as feelings of oneness in which the participant  
 1467 experiences an openness and enhanced connection to their own humanity and to the  
 1468 surrounding environment. Such experiences can be difficult to interpret and may  
 1469 challenge a therapist's own worldview. The therapist is not required to understand,  
 1470 support or even have an opinion about the nature or content of these experiences, but it  
 1471 is essential that they validate them and convey openness toward the participant's own  
 1472 view of them without dismissing or pathologizing any experience based on its unusual  
 1473 content. These experiences may provide the participant with a perspective that goes  
 1474 beyond identification with their personal narrative.  
 1475

1476 It is equally important that a therapist not show disappointment when a participant does  
 1477 not report a profound transcendental experience. The therapist should remain mindful of  
 1478 his/her own reactions and responses to the participant's experiences and validate any and  
 1479 all of them. However, that doesn't mean that the therapist must agree with unusual,  
 1480 magical thinking. Validation of the experiences simply means acknowledging the  
 1481 courage of opening up to the experience and the possibility that any experience will  
 1482 serve the intention of the session.  
 1483

### 1484 **8.3.8 Conclusion of the Psilocybin Session**

1485  
 1486 The drug effects last for 4-6 hours. During the final phase, it's important that the participant  
 1487 doesn't prematurely terminate the session by excessive talking. Even if little appears to be  
 1488 happening, periodic returns to the couch with music, headphones and eyeshade often provide  
 1489 for not only unexpected new experiential content, but safe and complete closure. The use of  
 1490 music is continued and light conversations between the therapist and participant are  
 1491 encouraged. This serves the dual role of  
 1492  
 1493  
 1494  
 1495

---

1496  
 1497  
 1498  
 1499  
 1500  
 1501  
 1502  
 1503  
 1504  
 1505  
 1506  
 1507  
 1508  
 1509  
 1510  
 1511  
 1512  
 1513  
 1514  
 1515  
 1516  
 1517  
 1518  
 1519  
 1520  
 1521  
 1522  
 1523  
 1524  
 1525  
 1526  
 1527  
 1528  
 1529  
 1530  
 1531  
 1532  
 1533  
 1534  
 1535  
 1536  
 1537  
 1538  
 1539  
 1540  
 1541  
 1542

re-orienting the participant to everyday reality and enabling the therapist to assess for immediate risks. By having a light casual conversation about dinner or the weather, the therapist assesses whether the participant is struggling to re-enter reality, or is distressed by the content of the session.

This can be discussed over a light meal with the participant, which—if they choose—can include the participant’s family members. The therapist needs to be mindful that the participant is adequately reoriented to everyday reality, and be certain that the participant is fully competent to travel before making the journey home. If the participant requires a longer period of time to return to normality, the therapist is expected to remain with the participant. If the participant requires emotional support due to a difficult session, the therapist is required to support the participant until the discomfort is resolved and the participant is fully back in everyday reality. The therapist should use open questions and empathic attention, as in previous sessions, to ensure that the participant feels supported.

### ***8.3.9 Specific Criteria for Discharge from the Facility on the Day of Drug Administration***

Participants will remain in the treatment facility for a full 8 hours after the start of the session, to ensure that the psilocybin effects have fully subsided. Participants are then assessed for safety by the therapists and the study clinician. Blood pressure will be monitored before discharge.

Participants are observed in the facility to ensure that they are fully ambulatory, have good balance, are psychologically stable, and can perform activities of daily living. Participants are also asked to complete the QIDS-SR-16 (Quick Inventory of Depressive Symptomatology – Self-Rated), C-SSRS (Columbia-Suicide Severity Rating Scale) and 5D-ASC (5 Dimensions of Altered States of Consciousness). These scales will be performed by the study team and will allow the clinician to assess participant’s emotional and cognitive stability, risk for suicidality and whether the perception-altering effects of psilocybin have subsided.

When judged safe and functional, participants are discharged in the care of a friend or a family member who will stay with the participant overnight. Plans for the follow-up visit the next morning are confirmed prior to discharge.

When the participant is ready to leave, he/she will be given information regarding the time and location of the next session (safety assessment and integration within 24 hours of the psilocybin session) as well as contact numbers if help is needed before then. The therapist is expected to be available 9am-5pm on weekdays and the hospital’s 24/7 number can be used on weekends and evenings to contact the study team. The participant must agree not to drive or use alcohol during the evening following the psilocybin

---

1543  
1544 session. The therapist should check in with the participant and family member(s) later in  
1545 the evening to confirm that the participant is comfortable and safe.  
1546

### 1547 **8.3.10 Planning for Unexpected Adverse Events** 1548

1549 For participants who may have an unusually prolonged experience or remain in severe  
1550 distress and are considered at risk for adverse reactions a psychiatrist will assess and  
1551 arrange appropriate care.  
1552

1553 In over 2,000 research sessions with psilocybin, there has never been a need for  
1554 emergency interventions.  
1555

## 1556 **8.4 Accountability** 1557

1558 The investigator must keep an accurate accounting of the number of IP units delivered to the  
1559 site and administered to participants during and at the completion of the study, as per FDA  
1560 and DEA standards of Schedule I drug management. This should be done on an IP  
1561 accountability log in the regulatory binder. The IP must be administered to participants only  
1562 by an appropriately qualified person. The IP is to be used in accordance with the protocol by  
1563 participants who are under the direct supervision of the investigator. Investigators should  
1564 maintain records that document adequately that the participants were administered the IP  
1565 dose specified by the protocol and reconcile all IPs received at the site before final  
1566 disposition. A chain of custody should be used to keep record of IP transportation from the  
1567 storage room to the treatment room and back as well as of person conducting the study drug  
1568 administration.  
1569

1570 Unused or expired study drug will be returned to Fisher Clinical Services, Inc., for  
1571 destruction at the study conclusion  
1572

## 1573 **8.5 Concomitant Therapy** 1574

1575 All prescription and non-prescription medications (eg, over-the-counter drugs and herbal  
1576 supplements) that participants report taking during the 30 days prior to Screening (V1)  
1577 will be assessed and recorded at that visit. For each medication, documentation should  
1578 list the trade or generic name, the total daily dose including units (or the dose, units and  
1579 scheduled and actual frequency of administration if the medication is not taken daily),  
1580 the route of administration, and the reason for use.  
1581

1582 Concomitant medication refers to all drugs and therapies used from the time the ICF was  
1583 signed through the end of study participation.  
1584

1585 Changes, additions, or discontinuations to medications will be assessed and recorded in  
1586 the clinical form during each study visit.  
1587  
1588  
1589  
1590  
1591

---

1592  
1593

1594  
1595  
1596  
1597  
1598  
1599  
1600  
1601  
1602  
1603  
1604  
1605  
1606  
1607  
1608  
1609  
1610  
1611  
1612  
1613  
1614  
1615  
1616  
1617  
1618  
1619  
1620  
1621  
1622  
1623  
1624  
1625  
1626  
1627  
1628  
1629  
1630  
1631  
1632  
1633

### **8.5.1 Permissible Medications**

Medications for the management of concurrent anxiety and insomnia, or nonpsychiatric medications that have a potential psychotropic effect are permitted within the following limitations. From the initial Screen Visit (V1) through final study visit (V10, EOS), participants are permitted adjunctive use of benzodiazepines (up to 2 mg of lorazepam equivalents per day for insomnia and anxiety if it is not taken within 12 h before the psilocybin dose. Prescription and nonprescription medications with psychoactive properties that are used as needed for nonpsychiatric conditions (eg, pseudoephedrine for allergies or cold symptoms) should be used no more than 2 times a week and not in the 12 hours before any study assessment. Documentation of the use of adjunctive anxiolytics, hypnotics, or medication with potential psychotropic properties (including over-the-counter preparations) will be obtained at each clinic visit.

Therapy considered necessary for the participant's welfare may be given at the discretion of the study clinician.

### **8.5.2 Definition of Women of Childbearing Potential and/or Acceptable Contraceptive Methods**

A woman is considered of childbearing potential (WOCBP), i.e. fertile, following menarche and until becoming post-menopausal unless permanently sterilized (i.e. has had a hysterectomy, bilateral salpingectomy or bilateral oophorectomy).

A woman who is not of childbearing potential is considered to be postmenopausal after at least 12 months without menstruation. The following methods of contraception, if used properly and used for the duration of the study, are generally considered highly effective:

- combined (estrogen and progestogen containing) hormonal contraception associated with inhibition of ovulation
    - oral
    - intravaginal
-

1634  
~~1635~~  
~~1636~~  
1637  
~~1638~~  
~~1639~~  
~~1640~~  
~~1641~~  
~~1642~~  
~~1643~~  
~~1644~~  
1651  
~~1652~~  
~~1653~~  
~~1654~~  
~~1655~~  
~~1656~~  
~~1657~~  
~~1658~~  
~~1659~~  
1660  
1661  
1662  
1663  
1664  
1665  
1666  
1667  
1668  
1669  
1670  
1671  
1672  
1673  
1674  
1675  
1676  
1677  
1678  
1679  
1680  
1681  
1682  
1683  
1684  
1685  
1686  
1687  
1688  
1689  
1690  
1691  
~~1692~~  
1693  
1694  
1695  
1696  
1697  
1698

- transdermal
- progestogen-only hormonal contraception associated with inhibition of ovulation:
  - ~~1645~~ oral
  - ~~1646~~ injectable
  - 1650 implantable
- intrauterine device (IUD)
- intrauterine hormone-releasing system (IUS)
- bilateral tubal occlusion
- vasectomised partner
- sexual abstinence

Periodic abstinence (ie, calendar, symptothermal, or postovulation methods, and tubal ligation/occlusion) are not an acceptable form of contraception for this study.

These methods of contraception also apply to partners of male participants.

The investigator and each participant will determine the appropriate method of contraception for the participant during the participation in the study. This will be documented at Screening (V1).

If a participant or the partner of a male participant becomes pregnant during the study, the investigator will notify the FDA immediately after the pregnancy is confirmed according to Section [12.5](#).

### **8.5.3 Prohibited Medications**

Participants are to be discontinued from serotonergic medications at least 2 weeks prior to Baseline (V2). Serotonergic medications include but are not limited to the selective-serotonin reuptake inhibitors, selective-norepinephrine reuptake inhibitors, tricyclic antidepressants, monoamine oxidase inhibitors, antipsychotics, and/or lithium. Common medications in these classes are noted below but the list is not exhaustive. These medications are not to be reintroduced to the participant until after V8 (Week 3). Participants who require concomitant medication(s) specifically for the treatment of depression at any time through the duration of the study will be assessed for reasons of resuming their medications and followed until 12 weeks post psilocybin administration. The study clinician should initiate treatment of symptoms of depression based on the clinical investigator's judgement and may change the venue of therapy (ie, outpatient to inpatient) if deemed clinically necessary. The intervention may be a combination of somatic (eg, approved antidepressant medication) and nonsomatic (various forms psychotherapy, eg, CBT) whose therapeutic intention is remediation of the depressive episode. Because the anticipated half-life of psilocybin is approximately 3 hours, and only 2 administrations of test

---

1699  
 1700  
 1701  
 1702  
 1703  
 1704  
~~1705~~  
~~1706~~  
 1709  
~~1710~~  
~~1711~~  
 1714  
 1715  
 1716  
 1717  
~~1718~~  
~~1720~~  
~~1721~~  
~~1724~~  
 1726  
 1727  
 1728  
 1729  
~~1730~~  
~~1731~~  
~~1734~~  
 1736  
~~1738~~  
~~1740~~  
~~1741~~  
~~1742~~  
~~1745~~  
 1747  
 1748  
 1749  
 1750  
~~1751~~  
~~1752~~  
 1755  
 1756  
 1757  
 1758  
~~1760~~  
~~1761~~  
~~1762~~  
~~1765~~  
~~1768~~  
 1769  
 1770  
 1771

product is permitted, no known issues regarding PK or pharmacodynamic interactions are envisioned within approximately 7 days of product administration.

#### 8.5.3.1 *Selective-Serotonin Reuptake Inhibitors*

- Citalopram
- Escitalopram
- Fluoxetine
- Fluvoxamine
- Paroxetine
- Sertraline

#### 8.5.3.2 *Selective-Norepinephrine Reuptake Inhibitors*

- Desvenlafaxine
- Duloxetine
- Levomilnacipran
- Milnacipran
- Venlafaxine

#### 8.5.3.3 *Tricyclic Antidepressants*

- Amitriptyline
- Amoxapine
- Clomipramine
- Desipramine
- Doxepine
- Imipramine
- Maprotiline
- Nortriptyline
- Protriptyline
- Trimipramine

#### 8.5.3.4 *Monoamine Oxidase Inhibitors*

- Phenelzine
- Selegiline
- Tranylcypromine

#### 8.5.3.5 *Antipsychotics*

- Aripiprazole
  - Asenapine
  - Clozapine
  - Lurasidone
  - Olanzapine
-



1772  
~~1773~~  
1775  
1776  
1777  
1778  
1779  
~~1780~~  
1782  
~~1783~~  
1785  
1786  
1787  
1788  
1789  
1790  
1791  
1792  
1793  
1794  
1795  
1796  
1797  
1798  
1799  
1800  
1801  
1802  
1803  
1804  
1805  
1806  
1807  
1808  
1809  
1810  
1811  
1812  
1813  
~~1814~~  
1816  
1817  
1818  
1819  
1820  
1821  
1822  
1823  
1824

- Quetiapine
- Risperidone
- Ziprasidone

#### **8.5.3.6 Other Prohibited Medications**

- Efavirenz
- Lorcaserin
- Serotonin-acting dietary supplements (such as 5-hydroxytryptophan or St. John's wort)

#### **8.5.4 Rescue Medication**

Rescue medications may be used during and after the psilocybin session.

The decision to medicate a participant will depend on responsible physician judgement that they are capable of maintaining the safety of the patient and others without medical intervention.

- Benzodiazepine anxiolytics is the pharmacological intervention of choice in case of acute psychological distress (eg, medications such as lorazepam or alprazolam that have a rapid onset, a short time until peak plasma concentration, and a short duration of therapeutic action; these medications will be given via the oral route.

In case of development of acute anxiety or psychotic symptoms requiring pharmacological intervention, the participant will stay in a clinic until the full resolution of the symptoms (overnight if required). The participant may be discharged from the clinic when, in the opinion of investigator, the condition has stabilized. The participant is to return home accompanied by a family member, friend, or chaperone. The site is to be notified by the participant that they have returned home safely, and in the absence of receiving a phone call site staff will directly contact the participant.

Information of how to manage subjects during difficult psychological states are detailed in the Study Manual (see attached).

#### **8.6 Compliance**

Administration of IP will be supervised by study personnel to ensure compliance.

---

1825  
1826  
1827  
1828  
1829  
1830  
1831  
1832  
1833  
1834  
1835  
1836  
1837  
1838  
1839  
1840  
1841  
1842  
1843  
1844  
1845  
1846  
1847  
1848  
1849  
1850  
1851  
1852  
1853  
1854  
1855  
1856  
1857  
1858  
1859  
1860  
1861  
1862  
1863  
1864  
1865  
1866  
1867  
1868  
1869  
1870  
1871

## 9 ADVERSE EVENTS

Throughout the course of the study, all AEs will be monitored and recorded on an AE CRF, including the AE's description, start and end date, seriousness, severity, action taken, and relationship to the IP. If AEs occur, the first concern will be the safety of the study participants.

Per ICH E2A: An AE is any untoward medical occurrence in a participant or clinical investigation participant administered a pharmaceutical product and which does not necessarily have to have a causal relationship with this treatment. An AE can therefore be any unfavourable and unintended sign (including an abnormal laboratory finding, for example), symptom, or disease temporally associated with the use of a medicinal product, whether considered related to the medicinal product.

Medical interventions such as surgeries, diagnostic procedures, and therapeutic procedures are not AEs but the action taken to treat the medical condition. They should be recorded as treatment of the AEs.

The investigator will promptly notify the local IRB of all SAEs and nonserious AEs occurring during the clinical trial so that legal obligations and ethical responsibilities towards the safety of participants and the safety of the product under clinical investigation are met.

The investigators have a legal responsibility to notify both the local regulatory authority and other regulatory agencies about the safety of a product under clinical investigation.

### 9.1 Documenting Adverse Events

AEs occurring from when the participant signs the ICF until the last study event will be recorded. Any AEs occurring before the start of treatment (ie, before the dose of the IP on Day 0 [V3]) will be recorded in the medical history. Also, the sign, symptom, or disease present before starting the treatment period are only considered AEs if they worsen after starting the treatment period. Investigators should document all significant illnesses that the participant has experienced within 3 months of the Screening visit. Additional illnesses present at the time informed consent is given are to be regarded as concomitant illnesses. Illnesses first occurring or detected during the study and/or worsening of a concomitant illness during the study are to be documented as AEs on the CRF.

All clinical laboratory results, vital signs, and ECG results or findings should be appraised by the investigator to determine their clinical significance. Isolated abnormal clinical laboratory test results, vital sign findings, or ECG findings (ie, not part of a reported diagnosis) should be reported as AEs if they are symptomatic, lead to IP

---

1872  
 1873  
 1874  
 1875  
 1876  
 1877  
 1878  
 1879  
 1880  
 1881  
 1882  
 1883  
 1884  
 1885  
 1886  
 1887  
 1888  
 1889  
 1890  
 1891  
 1892  
 1893  
 1894  
 1895  
 1896  
 1897  
 1902  
 1903  
 1904  
 1908  
 1909  
 1910  
 1915  
 1916  
 1917  
 1918  
 1919  
 1920  
 1921  
 1922  
 1923  
 1924  
 1925  
 1926  
 1927

discontinuation, require corrective treatment, or constitute an AE in the investigator's clinical judgment.

At each time point, the investigator will determine whether any AEs have occurred by evaluating the participant. AEs may be directly observed, reported spontaneously by the participant or by questioning the participant at each time point. Participants should be questioned in a general way, without asking about the occurrence of any specific symptoms. The investigator must assess all AEs to determine intensity, causality and seriousness, in accordance with the definitions in Sections 9.2, 9.3, and 10.1, respectively. The investigator's assessment must be clearly documented in the study site's source documentation with the investigator's signature.

The investigator should report all AEs on the AE page(s) of the CRF and source documents, regardless of seriousness, severity, and causality. Whenever possible, an AE will be reported using a diagnostic term, (eg, "common cold" or "upper respiratory infection" rather than "runny nose, cough, mild fever") and should be described with the attributes described in Sections 9.2 and 9.3.

## 9.2 Assessment of Intensity

Each AE will be classified according to the following criteria:

|           |      |                                                            |
|-----------|------|------------------------------------------------------------|
|           | 1898 |                                                            |
|           | 1899 |                                                            |
| Mild:     | 1900 | The AE does not interfere in a significant manner with the |
|           | 1901 | participant's normal level of functioning.                 |
|           | 1905 |                                                            |
| Moderate: | 1906 | The AE produces some impairment of functioning, but is     |
|           | 1907 | not hazardous to the participant's health.                 |
|           | 1911 |                                                            |
| Severe:   | 1912 | The AE produces significant impairment of functioning      |
|           | 1913 | or incapacitation and is a definite hazard to the          |
|           | 1914 | participant's health.                                      |

Severity versus Seriousness: Severity is used to describe the intensity of a specific event while the event itself, however, may be of relatively minor medical significance (such as severe headache). This is not the same as "seriousness," which is based on participant/event outcome at the time of the event.

When changes in the intensity of an AE occur more frequently than once a day, the maximum intensity for the experience should be noted. If the intensity category changes over several days, those changes should be recorded separately (with distinct onset dates).

---

1928  
 1929  
 1930  
 1931  
 1932  
 1933  
 1934  
 1935  
 1936  
 1937  
 1938  
 1944  
 1945  
 1946  
 1957  
 1958  
 1959  
 1963  
 1964  
 1965  
 1966  
 1967  
 1968  
 1969  
 1970  
 1971  
 1972  
 1973  
 1974  
 1975  
 1976  
 1977  
 1978  
 1979  
 1980  
 1981  
 1982  
 1983  
 1984  
 1985  
 1986  
 1987

### 9.3 Assessment of Causality

Each AE will be assessed as to its relationship to the IP, based on the following criteria. Although the attribution by the investigator will be collected for reported events, for analytic purposes a temporal association with the use of the IP will be assumed sufficient for at least plausible association.

|                   |      |                                                                                                                                                                                                                                                                                                                                                                                                                                                                                                                      |
|-------------------|------|----------------------------------------------------------------------------------------------------------------------------------------------------------------------------------------------------------------------------------------------------------------------------------------------------------------------------------------------------------------------------------------------------------------------------------------------------------------------------------------------------------------------|
|                   | 1939 |                                                                                                                                                                                                                                                                                                                                                                                                                                                                                                                      |
|                   | 1940 |                                                                                                                                                                                                                                                                                                                                                                                                                                                                                                                      |
| Not related:      | 1941 | No causal relationship exists between the IP and the AE, but an obvious alternative cause exists, eg, the participant's underlying medical condition or concomitant therapy.                                                                                                                                                                                                                                                                                                                                         |
|                   | 1942 |                                                                                                                                                                                                                                                                                                                                                                                                                                                                                                                      |
|                   | 1943 |                                                                                                                                                                                                                                                                                                                                                                                                                                                                                                                      |
|                   | 1947 |                                                                                                                                                                                                                                                                                                                                                                                                                                                                                                                      |
| Possibly related: | 1948 | A connection with the administration of the IP appears unlikely, but cannot be ruled out with certainty. An AE may be considered possibly related if or when it meets 2 of the following criteria: (1) it follows a reasonable temporal sequence from administration of the IP; (2) it could not readily have been produced by the participant's clinical state, environmental or toxic factors, or other modes of therapy administered to the participant; or (3) it follows a known pattern of response to the IP. |
|                   | 1949 |                                                                                                                                                                                                                                                                                                                                                                                                                                                                                                                      |
|                   | 1950 |                                                                                                                                                                                                                                                                                                                                                                                                                                                                                                                      |
|                   | 1951 |                                                                                                                                                                                                                                                                                                                                                                                                                                                                                                                      |
|                   | 1952 |                                                                                                                                                                                                                                                                                                                                                                                                                                                                                                                      |
|                   | 1953 |                                                                                                                                                                                                                                                                                                                                                                                                                                                                                                                      |
|                   | 1954 |                                                                                                                                                                                                                                                                                                                                                                                                                                                                                                                      |
|                   | 1955 |                                                                                                                                                                                                                                                                                                                                                                                                                                                                                                                      |
|                   | 1956 |                                                                                                                                                                                                                                                                                                                                                                                                                                                                                                                      |
|                   | 1960 |                                                                                                                                                                                                                                                                                                                                                                                                                                                                                                                      |
| Related:          | 1961 | There is a reasonable/plausible possibility that the AE may have been caused by the IP.                                                                                                                                                                                                                                                                                                                                                                                                                              |
|                   | 1962 |                                                                                                                                                                                                                                                                                                                                                                                                                                                                                                                      |

When assessing the relationship to the IP, the following criteria will be considered:

- Known class effect
- Biological plausibility
- Lack of alternative explanation—concomitant drug or disease

### 9.4 Other Action Taken for Event

- 1 = None (ie, no treatment was required)
  - 2 = Medication required (ie, prescription and/or OTC medication was required to treat the AE)
  - 3 = Hospitalization or prolongation of hospitalization required (ie, hospitalization was required or prolonged because of the AE, whether medication was required)
-

1988  
 1989  
 1990  
 1991  
 1992  
 1993  
 1994  
 1995  
 1996  
 1997  
 1998  
 1999  
 2000  
 2001  
 2002  
 2003  
 2004  
 2005  
 2006  
 2007  
 2008  
 2009  
 2010  
 2011  
 2012  
 2013  
 2014  
 2015  
 2016  
 2017  
 2018  
 2019  
 2020  
 2021  
 2022  
 2023  
 2024  
 2025  
 2026  
 2027  
 2028  
 2029  
 2030  
 2031  
 2032  
 2033  
 2034  
 2035  
 2036  
 2037  
 2038  
 2039  
 2040

4 = Other

## 9.5 Adverse Event Outcome

1 = Recovered/Resolved (ie, the participant fully recovered from the AE with no residual effect observed)

2 = Recovering/Resolving (ie, the AE improved but has not fully resolved)

3 = Not Recovered/Not Resolved (ie, the AE itself is still present and observable)

4 = Recovered/Resolved with Sequelae (ie, the residual effects of the AE are still present and observable, including sequelae/residual effects)

5 = Fatal (ie, 'fatal' should be used when death is a direct outcome of the AE)

6 = Unknown

## 9.6 Clinical Laboratory Changes

Any abnormality in a laboratory value that is new in onset or which has worsened in severity or frequency from the baseline condition and meets 1 of the following criteria will be recorded on the AE pages of the clinical report form:

- Requires therapeutic intervention or diagnostic tests
- Leads to discontinuation of IP
- Has accompanying or inducing symptoms or signs
- Is judged by the investigator as clinically significant

Combined elevations of aminotransferases and bilirubin, either serious or nonserious, and whether causally related, meeting the criteria of a potential Hy's Law case (total bilirubin level  $\geq 2 \times$  upper limit of normal [ULN] with simultaneous ALT or AST  $\geq 3 \times$  ULN) should always be reported to the sponsor as soon as possible following the procedures outlined in Section 10.2 for SAE reporting, with the investigator's assessment of seriousness, causality, and a detailed narrative.

## 9.7 Overdose

Any instance of overdose (suspected or confirmed) must be communicated to the local IRB within 24 h and be fully documented as an AE or SAE if it meets the SAE criteria. Details of any signs or symptoms and their management should be recorded including details of any antidote(s) administered.

---

2041  
2042  
2043  
2044  
2045  
2046  
2047  
2048  
2049  
2050  
2051  
2052  
2053  
2054  
2055  
2056  
2057  
2058  
2059  
2060  
2061  
2062  
2063  
2064  
2065  
2066  
2067  
2068  
2069  
2070  
2071  
2072  
2073  
2074  
2075  
2076  
2077  
2078  
2079  
2080  
2081  
2082  
2083  
2084  
2085  
2086  
2087  
2088  
2089  
2090  
2091  
2092  
2093  
2094

## 9.9 Adverse Event Follow-up

All AEs will be followed until resolved or stable and the outcome documented on the CRF.

## 10 SERIOUS ADVERSE EVENTS

### 10.1 Definition of Serious Adverse Event

An SAE is any event that meets any of the following criteria:

- Death
- Life-threatening
- Inpatient hospitalization or prolongation of existing hospitalization
- Persistent or significant disability/incapacity
- Congenital anomaly/birth defect in the offspring of a participant who received psilocybin.
- Other: Important medical events that may not result in death, be life-threatening, or require hospitalization, may be considered an SAE when, based upon appropriate medical judgment, they may jeopardize the participant and may require medical or surgical intervention to prevent one of the outcomes listed in this definition. Examples of such events are:
  - Intensive treatment in an emergency room or at home for allergic bronchospasm
  - Blood dyscrasias or convulsions that do not result in inpatient hospitalization
  - Development of drug dependency or drug abuse

#### Definition of Terms

**Life threatening:** An AE is life threatening if the participant was at immediate risk of death from the event as it occurred; ie, it does not include a reaction that if it had occurred in a more serious form might have caused death. For example, drug-induced hepatitis that resolved without evidence of hepatic failure would not be considered life threatening even though drug-induced hepatitis can be fatal.

**Hospitalization:** AEs requiring hospitalization should be considered SAEs.

Hospitalization for elective surgery or routine clinical procedures that are not the result of AEs (eg, elective surgery for a pre-existing condition that has not worsened) need not be considered AEs or SAEs. If anything untoward is reported during the procedure, that occurrence must be reported as an AE, either 'serious' or 'nonserious' according to the usual criteria.

In general, hospitalization signifies that the participant has been detained (usually involving at least an overnight stay) at the hospital or emergency ward for observation and/or treatment that would not have been appropriate in the

2095 physician's office or outpatient setting. When in doubt as to whether  
2096 'hospitalization' occurred or was necessary, the AE should be considered serious.

2097  
2098 For deaths, the underlying or immediate cause of death should always be reported as  
2099 an SAE.

2100  
2101 Any serious, untoward event that may occur subsequent to the reporting period that the  
2102 investigator assesses as related to IP should also be reported and managed as an SAE.

2103  
2104 The investigator should follow participants with AEs until the event has resolved or the  
2105 condition has stabilised. In case of unresolved AEs, including significant abnormal  
2106 clinical laboratory values at the end of study assessment, these events will be followed  
2107 until resolution or until they become clinically not relevant.

2108  
2109 Disability/incapacitating: An AE is incapacitating or disabling if the experience results  
2110 in a substantial and/or permanent disruption of the participant's ability to carry out  
2111 normal life functions.

2112  
2113

## 2114 **10.2 Reporting Serious Adverse Events**

2115  
2116 Each AE will be assessed to determine whether it meets seriousness criteria  
2117 (Section 10.1). If the AE is considered serious, the investigator should report this event  
2118 to the IRB according to its standard operating procedures.

2119  
2120  
2121 If the investigator detects an SAE in a study participant after the last scheduled follow-  
2122 up visit, and considers the SAE related or possibly related to this study's IP  
2123 administration, the investigator should report it to IRB of the other site.

2124  
2125 All information about SAEs will be collected and reported via the local IRB SAE form  
2126 and sent to IRBNet. The investigator should send the initial report within 24 h of becoming  
2127 aware of the SAE.

2128  
2129 If the SAE has not resolved at the time the investigator submits an initial SAE report, the  
2130 investigator must provide a follow-up report as soon as the event resolves (or upon  
2131 receipt of significant information if the event is still ongoing). The investigator should  
2132 not delay reporting an SAE in order to obtain additional information.

2133  
2134 All SAEs shall be followed until resolution, until the condition stabilizes, or until the  
2135 participant is lost to follow-up, or otherwise explained. Once the SAE is resolved, the  
2136 corresponding AE CRF page shall be updated. Additionally, any relevant laboratory test  
2137 reports, consultation reports from other health care professionals, discharge summaries,  
2138 or other information that has been gathered about the event shall be transmitted to the  
2139 sponsor.

2140  
2141  
2142 The original SAE form should be kept at the study site.

2143  
2144  
2145  
2146

## 2147 **11 STATISTICS**

2148  
2149  
2150

2151 **11.1 Statistical Methods**

2152

2153 The Safety Population will consist of all randomized participants who receive  
2154 study treatment, regardless of whether or not treated. This population will be used  
2155 for all summaries of participant accountability, demographic and baseline data, and  
2156 safety information, including AE incidence.

2157

2158 The Full Analysis Set (FAS) will consist of all participants randomized who also  
2159 receive the dose of IP.

2160

2161 The modified intention-to-treat population will consist of all participants in the FAS that  
2162 have at least 1 post dose assessment.

---

2163

2164 The Per Protocol (PP) population will consist of all participants in the FAS who do not  
2165 have a major protocol deviation. Major protocol deviations will be reviewed and  
2166 determined prior to unblinding. The PP population will be used for supportive sensitivity  
2167 analyses.

2168

2169 **11.2.1 Efficacy and Outcome Measures**

2170

2171 • MADRS

2172

2173 • QIDS-SR-16

2174

2175 • SDS

2176

2177 • GAD-7

2178

2179 • Q-LES-Q-SF

2180

2181 • WSAS

2182

2183 **11.2.2 Analysis of Efficacy**

2184

2185 The primary efficacy endpoint (change from Baseline in MADRS total score at Week 3)  
2186 will be evaluated with a mixed effects model for repeated measures analysis. The model  
2187 will include treatment, visit, study site, prior psychedelic experience, treatment by visit  
2188 interaction, participant as a random effect, and baseline MADRS total score. A  
2189 sensitivity analysis will be performed on the primary MMRM model adding treatment  
2190 by study site or country interaction into the model. This exploratory analysis will be  
2191 performed for information only due to the small sample size and lack of comparison  
2192 ranges.

2193

2194 The 3 secondary efficacy endpoints that are dichotomous variables (proportion of  
2195 participants who are responders, remitters, and sustained responders) will be analyzed  
2196 using the Cochran Mantel Haenszel chi square test. A stepdown procedure to correct  
2197 for multiplicity will be employed.

2198

2199 Time to event measures will be evaluated using Kaplan-Meier methods.

2200

2201 Response and remission rates will be summarized at each visit.

2202

2203 Change from baseline in continuous efficacy measures, including the QIDS-SR-16  
2204 scale and GAD-7 total scores at each point, will be analyzed based on last observation  
2205 carried forward data using an analysis of covariance model, with treatment and study  
2206



2207 site as factors, and the respective baseline score as the covariate. The exploratory  
2208 analyses for quality of life and wellbeing, functioning and associated disability,  
2209 cognitive function, and anxiety are not hierarchical; there will be no correction for  
2210 multiplicity in these analyses.  
2211

2212 Scores for all efficacy endpoints, including the Q-LES-Q-SF and the EQ VAS, will be  
2213 summarized over time using descriptive statistics for all visits during the observation  
2214 period.  
2215

2216 The covariate selection process will be addressed in the SAP to be approved before any  
2217 analyses are undertaken.  
2218

2219

### 2220 **11.2.3 Analysis of Safety**

2221

2222 Safety analyses will be performed using data from the Safety Population. Safety will be  
2223 evaluated based of AEs, vital signs, clinical laboratory assessments, and ECG findings.  
2224

2225

#### 2226 **11.2.3.1 Columbia-Suicide Severity Rating Scale**

2227

2228 Item scores from the C-SSRS, all visits by randomized treatment, the item scores from the  
2229 version assessing suicidality since the last visit, and all postbaseline visits (V3 to V10,  
2230 inclusive) by treatment will be tabulated. Summary statistics of suicidal ideation and suicidal  
2231 behavior following IP administration will be presented by randomized treatment.

2232

#### 2233 **11.2.3.2 Adverse Events**

2234

2235 AEs will be coded by Preferred Term (PT) using the Medical Dictionary for Regulatory  
2236 Activities (MedDRA) classification. All reported AEs with onset or worsening after the  
2237 administration of study medication will be included in the analysis. The incidence of  
2238 AEs will be summarized by treatment group, and by severity and relationship to IP.  
2239 Serious AEs and AEs leading to withdrawal from the study will be tabulated.

2240

2241 A TEAE is defined as any AE that has an onset on or after the dose of IP, or  
2242 any pre-existing condition that has worsened on or after the dose of IP.

2243

2244 The incidence of TEAEs and treatment-related AEs will also be summarized by  
2245 maximum severity and most-related relationship to IP by MedDRA primary system organ  
2246 class and PT. The summary will include the total number and percentage of participants  
2247 reporting an event. In counting the number of events reported, a continuous event, ie,  
2248 reported more than once and which did not cease, will be counted only once; non-  
2249 continuous AEs reported several times by the same participant will be counted as  
2250 multiple events.

2251

2252

#### 2253 **11.2.3.3 Vital Signs**

2254

2255 Changes from Baseline in vital signs, blood pressure (systolic and diastolic), body  
2256 temperature, pulse rate, and respiratory rate, will be summarized for each treatment group  
2257 using descriptive statistics. The last measurement obtained prior to IP administration will  
2258 serve as baseline. The percentage of participants with values outside clinically important  
2259 limits will be summarized. A listing of weight at V1 will be provided.

2260

### 2260 **11.2.4 Demographic and Baseline Characteristics**

2261  
2262 Treatment groups will be compared with respect to participant demographics and  
2263 baseline characteristics will be summarized using descriptive statistics, no formal  
2264 statistical analysis tests will be performed.

2265

2266 **11.2.5 Data Safety Monitoring Board**

2267

2268 The DSMB will consist of three clinicians experienced with mood disorders. Of the three, one  
2269 will have experience with psychedelics. The DSMB will meet every six months. All SAEs will  
2270 be reported and to the SP IRB

2271

2272

2273

2274

2275

2276

2277

2278

2279

2280  
2281  
2282  
2283  
2284  
~~2285~~  
2286  
2287  
2288  
~~2289~~  
2291  
2292  
2293  
2294  
2295  
2296  
2297  
2298  
2299  
2300  
2301  
2302  
2303  
2304  
2305  
2306  
2307  
2308  
2309  
2310  
2311  
2312  
2313  
2314  
2315  
2316  
2317  
2318  
2319  
2320  
2321  
2322  
2323  
2324  
2325  
2326  
~~2327~~

## 12 ETHICS AND RESPONSIBILITIES

### 12.1 Good Clinical Practice

---

The study will be performed in accordance with this protocol, US investigational new drug (IND) regulations (21 Code of Federal Regulations [CFR] 312), ICH guidelines for Good Clinical Practice (GCP), and the regulations on electronic records and electronic signature (21 CFR 11).

The study will also be performed in accordance with U.S. laws and regulations where the research is carried out.

### 12.2 Steering Committee

A Steering Committee will not be used for this study.

### 12.3 Institutional Review Board/Independent Ethics Committee

Conduct of the study must be approved by an appropriately constituted IRB/ IEC.

Approval is required for the study protocol, protocol amendments, ICFs, participant information sheets, and advertising materials. No IP will be shipped to a site until written IRB/IEC authorization has been received by the sponsor or its representative.

### 12.4 Informed Consent

Participants should be informed that they may withdraw from the study at any time. They will receive all information that is required by local regulations and ICH guidelines. The principal investigator or a designated representative will provide the sponsor or its representative with a copy of the IRB/IEC-approved ICF before the start of the study.

### 12.5 Exposure in Utero During Clinical Studies

The FDA must be notified of any participant who becomes pregnant within 30 days of receiving the IP. Reporting after the follow-up visit or ET is done voluntarily by the investigator.

The FDA must be notified of any male participant whose partner becomes pregnant within 30 days of the participant receiving the IP. Reporting after any follow-up visit or ET is done voluntarily by the investigator.

Although pregnancy is not technically an AE, all pregnancies must be followed to conclusion to determine their outcome. This information is important for both drug safety and public health concerns. It is the responsibility of the investigator, or designee, to report any pregnancy in a participant, or the partner of a male participant, using the CRF pregnancy within 24 h of becoming aware of the event. The investigator should make every effort to follow the

---

2329  
2330 participant until completion of the pregnancy with complete pregnancy outcome  
2331 information, including normal delivery and/or induced abortion. The adverse pregnancy  
2332 outcome, either serious or nonserious, should be reported in accordance with study  
2333 procedures. If the outcome of the pregnancy meets the criteria for immediate  
2334 classification as an SAE (ie, post-partum complications, spontaneous or induced  
2335 abortion, stillbirth, neonatal death, or congenital anomaly, including that in an aborted  
2336 foetus), the investigator should follow the procedures for reporting SAEs outlined in  
2337 Section 10.  
2338

2339 For reports of pregnancy in the partner of a male participant, the SAE form (if associated  
2340 with an adverse outcome) should be completed with the participant's randomization  
2341 number, initials, and date of birth, and details regarding the partner of the male  
2342 participant should be entered in the narrative section.  
2343

## 2344 **12.6 Records Management**

2345

2346 The investigator grants permission to personnel and appropriate regulatory authorities,  
2347 for on-site monitoring of all appropriate study documentation, paper and electronic, as  
2348 well as on-site review of the procedures employed in CRF generation, where clinically  
2349 appropriate.  
2350

## 2351 **12.7 Source Documentation**

2352

2353 Note that a variety of original documents, data, and records will be considered as source  
2354 documents in this trial.  
2355

## 2356 **12.8 Study Files and Record Retention**

2357

2358 The investigator must arrange for retention of study records at the site. The nature of the  
2359 records and the duration of the retention period must meet the requirements of the  
2360 relevant regulatory authority. The investigator should take measures to prevent  
2361 accidental or premature destruction of these documents.  
2362

# 2363 **13 STUDY DISCONTINUATION**

2364

2365 The Principal Investigator reserve the right to terminate the study at the investigator's site at  
2366 any time. The Principal Investigator will inform the IRB/IEC of the termination. In  
2367 terminating the study, the Principal Investigator will assure that adequate consideration is  
2368 given to the protection of the participants' interests.  
2369  
2370  
2371  
2372  
2373  
2374  
2375  
2376  
2377  
2378  
2379  
2380  
2381  
2382  
2383

---

## 14 CONFIDENTIALITY

2384  
2385  
2386  
2387  
2388  
2389  
2390  
2391  
2392  
2393  
2394  
~~2395~~  
2396  
2397  
2398  
2399  
2400  
2401  
2402  
2403  
2404  
2405  
2406  
2407  
2408  
2409  
2410  
2411  
2412  
2413  
2414  
2415  
2416  
2417  
2418  
2419  
2420  
2421  
2422  
2423  
2424  
2425  
2426  
2427  
2428  
2429  
2430  
2431  
2432  
2433  
2434  
2435  
2436  
2437  
2438  
2439  
2440  
2441  
2442  
2443  
2444  
2445

All information generated in this study is considered highly confidential and sensitive, and must not be disclosed to any person or entity not directly involved with the study unless prior written consent is obtained. However, authorized regulatory officials, IRB personnel, and its authorized representatives are allowed full access to the records.

Identification of participants and CRFs shall be by study number only. All identifying information including initials, screening and treatment numbers. If required, the participant's full name may be made known to an authorized regulatory agency or other authorized official as required by law.

---

2446  
 2447  
 2448  
 2449  
 2450  
 2451  
 2452  
 2453  
 2454  
 2455  
 2456  
 2457  
 2458  
 2459  
 2460  
 2461  
 2462  
 2463  
 2464  
 2465  
 2466  
 2467  
 2468  
 2469  
 2470  
 2471  
 2472  
 2473  
 2474  
 2475  
 2476  
 2477  
 2478  
 2479  
 2480  
 2481  
 2482  
 2483  
 2484  
 2485  
 2486  
 2487  
 2488  
 2489  
 2490  
 2491  
 2492  
 2493  
 2494  
 2495  
 2496

## 15 REFERENCES

1. Brown RT, Nicholas CR, Cozzi NV, et al. Pharmacokinetics of escalating doses of oral psilocybin in healthy adults. *Clin Pharmacokinet.* 2017;45(12):1543-54. DOI 10.1007/s40262-017-0540-6.
2. Barrett FS, Johnson MW, and Griffiths RR. *J Psychopharm.* (2015) Validation of the revised Mystical Experience Questionnaire in experimental sessions with psilocybin. DOI: 10.1177/0269881115609019.
3. Barrett FS, Bradstreet MP, Leoutsakos JS, Johnson MW and Griffiths RR. (2016) The Challenging Experience Questionnaire: Characterization of challenging experiences with psilocybin mushrooms. DOI: 10.1177/0269881116678781
4. Carhart-Harris RL, Bolstridge M, Rucker J, et al. Psilocybin with psychological support for treatment-resistant depression: an open-label feasibility study. *Lancet.* 2016;3(7):619-627.
5. Carter OL, Burr DC, Pettigrew JD, Wallis GM, Hasler F, Vollenweider FX. Using psilocybin to investigate the relationship between attention, working memory, and the serotonin 1A and 2A receptors. *J Cogn Neurosci.* 2005a;17(10):1497-1508.
6. Carhart-Harris, R., Roseman, L., Bolstridge, M., Demetriou, L., Pannekoek, J., Wall, M., Tanner, M., Kaelen, M., McGonigle, J., Murphy, K., Leech, R., Curran, H. and Nutt, D. (2017). Psilocybin for treatment-resistant depression: fMRI-measured brain mechanisms. *Scientific Reports*, 7(1).
7. Chandler GM, Iosifescu DV, Pollack MH, Targum SD, Fava M. Validation of the Massachusetts General Hospital Antidepressant Treatment History Questionnaire (ATRHQ). *CNS Neurosci Ther.* 2010;16(5):322-325.
8. COMPASS Pathways Limited. Investigator's Brochure for Psilocybin. 2017.
9. Dittrich A. The standardized psychometric assessment of altered states of consciousness (ASCs) in humans. *Pharmacopsychiatry.* 1998;31(Suppl 2):80-84.
10. Dittrich A, Lamparter D, Maurer M. 5D-ABZ: Fragebogen zur Erfassung Aussergewöhnlicher Bewusstseinszustände Eine kurze Einführung. [5D-ASC: questionnaire for the assessment of altered states of consciousness. A short introduction]. PSIN Plus Publications. 2006.
11. Elangbam CS, Job LE, Zadrozny LM, et al. 5-hydroxytryptamine (5HT)-induced valvulopathy: compositional valvular alteration are associated with 5HT<sub>2B</sub> receptor and 5HT transporter transcript changes in Sprague-Dawley rats. *Exp Toxicol Pathol.* 2008;60(4-5):253-262.
12. Elangbam CS. Drug-induced valvulopathy: an update. *Toxicologic Pathology,* 2010;38:837-848.
13. Endicott J, Nee J, Harrison W, Blumenthal R. Quality of Life Enjoyment and Satisfaction Questionnaire: A New Measure. *Psychopharmacology Bulletin* 1993;29:321-326.
14. Gouzoulis-Mayfrank E, Thelen B, Habermeyer E, et al. 1999b. Psychopathological, neuroendocrine and autonomic effects of 3,4-methylenedioxyethylamphetamine

- 2497 (MDE), psilocybin and D-methamphetamine in healthy volunteers. Results of an  
2498 experimental double-blind placebo-controlled study. *Psychopharmacology* (Berl).  
2499 1999b;142(1):41-50.
- 2500 15. Griffiths RR, Johnson MW, Richards WA, Richards BD, McCann U, Jesse R.  
2501 Psilocybin occasioned mystical-type experiences: immediate and persisting dose-  
2502 related effects. *Psychopharmacology* (Berl). 2011;218(4):649-665.
- 2503 16. Hamilton M. A rating scale for depression. *Journal of Neurology, Neurosurgery and*  
2504 *Psychiatry*. 1960;23:56-62. doi:10.1136/jnnp.23.1.56. PMID: 14399272.
- 2505 17. Hasler F, Bourquin D, Brenneisen R, Bar T, Vollenweider FX. Determination of  
2506 psilocin and 4-hydroxyindole-3-acetic acid in plasma by HPLC-ECD and  
2507 pharmacokinetic profiles of oral and intravenous psilocybin in man. *Pharm Acta Helv*.  
2508 1997;72(3):175-184.
- 2509 18. Hasler F, Bourquin D, Brenneisen R, Vollenweider FX. Renal excretion profiles of  
2510 psilocin following oral administration of psilocybin: a controlled study in man. *J*  
2511 *Pharm Biomed Anal*. 2002;30(2):331-339.
- 2512 19. Hasler F, Grimberg U, Benz MA, Huber T, Vollenweider FX. Acute psychological and  
2513 physiological effects of psilocybin in healthy humans: a double-blind, placebo-  
2514 controlled dose-effect study. *Psychopharmacology* (Berl). 2004;172(2):145-156.
- 2515 20. Hasler F. Untersuchungen zur Humanpharmakokinetik von Psilocybin. Berne:  
2516 University of Berne (Switzerland). 1997
- 2517 21. Jha MK, Minhajuddin A, Greer TL, Carmody T, Rush AJ, Trivedi MH. Early  
2518 improvement in psychosocial function predicts longer-term symptomatic remission in  
2519 depressed patients. *PLoS One*. 2016;11(12):e0167901.
- 2520 22. Lindenblatt H, Kramer E, Holzmann-Erens P, Gouzoulis-Mayfrank E, Kovar KA.  
2521 Quantitation of psilocin in human plasma by high-performance liquid chromatography  
2522 and electrochemical detection: comparison of liquid-liquid extraction with automated  
2523 on-line solid-phase extraction. *J Chromatogr B Biomed Sci Appl*. 1998;709(2):255-  
2524 263.
- 2525 23. McGuire-Snieckus R, McCabe R, Catty J, Hansson L, Priebe S. A new scale to assess  
2526 the therapeutic relationship in community mental health care: STAR. *Psychol Med*.  
2527 2007;37:85-95.
- 2528 24. Montgomery SA, Asberg M. A new depression scale designed to be sensitive to  
2529 change. *Br J Psychiatry*. 1979;134:382-389.
- 2530 25. Mundt JC, Marks IM, Shear MK, Greist JH. The work and social adjustment scale: a  
2531 simple measure of impairment in functioning. *Br J Psychiatry*. 2002;180:461-464.
- 2532 26. Passie T, Seifert J, Schneider U, Emrich HM. The pharmacology of psilocybin. *Addict*  
2533 *Biol*. 2002;7(4):357-364.
- 2534 27. Passie T. A history of the use of psilocybin in psychotherapy. In: Metzner R, editor.  
2535 Sacred mushroom of visions: Teonanácatl: a sourcebook on the psilocybin mushroom.  
2536 Rochester, Vermont: Park Street Press; 2005. p. 113-138.
- 2537 28. Ray TS. Psychedelics and the human receptorome. *PLoS One*. 2010;5(2): e9019.
- 2538 29. Rickli A, Moning OD, Hoener MC, Liechti ME. Receptor interactin profiles of novel  
2539 psychoactive tryptamines compared with classic hallucinogens. *J Eur Neuro*.  
2540 2016;261327-1337.

- 2541 30. Rush AJ, Trivedi MH, Ibrahim HM, et al. The 16-item quick inventory of depressive  
 2542 symptomatology (QIDS) clinician rating (QIDS-C) and self-report (QIDS-SR): a  
 2543 psychometric evaluation in patients with chronic major depression. *Biological*  
 2544 *Psychiatry*. 2003;54:573-583.  
 2545
- 2546 31. Oquendo M. A., Halberstam B. & Mann J. J., Risk factors for suicidal behavior: utility  
 2547 and limitations of research instruments. In M.B. First [Ed.] *Standardized Evaluation in*  
 2548 *Clinical Practice*, pp. 103 -130, 2003.  
 2549
- 2550 32. Sheehan DV. 1983. [http://www.cqaimh.org/pdf/tool\\_lof\\_sds.pdf](http://www.cqaimh.org/pdf/tool_lof_sds.pdf).  
 2551
- 2552 33. Posner K, Melvin GA, Stanley B. Identification and monitoring of suicide risk in primary  
 2553 care settings. *Clinical Focus*. Dec 2007; 14 (12).  
 2554
- 2555 34. Spitzer RL, Kroenke K., Williams, JB, Lowe, B. A brief measure for assessing generalized  
 2556 anxiety disorder: the GAD-7. *Arch Intern Med*. 2006;166(10):1092-7.  
 2557
- 2558 35. Studerus E, Gamma A, Vollenweider FX. Psychometric evaluation of the altered states  
 2559 of consciousness rating scale (OAV). *PLoS One*. 2010;5: e12412.  
 2560
- 2561 36. Tellegen A, Atkinson G. Openness to absorbing and self-altering experiences  
 2562 (“absorption”), a trait related to hypnotic susceptibility. *Journal of Abnormal*  
 2563 *Psychology*. 1974;83:268-77.  
 2564
- 2565 37. Tylš F, Páleníček T, Horáček J. Psilocybin-summary of knowledge and new  
 2566 perspectives. *Eur Neuropsychopharmacol*. 2014 Mar;24(3):342-356.  
 2567
- 2568 38. Vollenweider FX, Vollenweider-Scherpenhuyzen MF, Babler A, Vogel H, Hell D.  
 2569 Psilocybin induces schizophrenia-like psychosis in humans via a serotonin-2 agonist  
 2570 action. *Neuroreport*. 1998;9(17):3897-3902.  
 2571
- 2572 39. Wechsler D. Wechsler Adult Intelligence Scale-Third edition (WAIS-III). San  
 2573 Antonio (TX): Psychological Corporation; 1997a
- 2574 40. Williams JB. A structured interview guide for the Hamilton depression rating scale.  
 2575 *Arch Gen Psychiatry*. 1988;45:742-747.  
 2576
- 2577 41. Williams JB, Kobak KA. Development and reliability of a structured interview guide  
 2578 for the Montgomery Asberg Depression Rating Scale (SIGMA). *Br J Psychiatry*.  
 2579 2008;192(1):52-58.  
 2580
- 2581 42. Fekadu A, Wooderson A, Donaldson C, Markopoulou K, Masterson B, Poon L,  
 2582 Cleare AJ. A multidimensional tool to quantify treatment resistance in depression: the  
 2583 Maudsley Staging Method. *J Clin Psychiatry*. 2009; 70(2):177-184.  
 2584
- 2585 43. Altshuler LL, McElroy SL, Calimlim B, Gitlin M, Keck PE Jr, Aquino-Elias A, Martens  
 2586 BE, Fischer EG, English TL, Roach J, Suppes T. Switch Rates During Acute Treatment  
 2587 for Bipolar II Depression With Lithium, Sertraline, or the Two Combined: A  
 2588 Randomized Double-Blind Comparison. *Am J Psychiatry*. 2017 Mar 1;174(3):266-276.  
 2589
- 2590 44. Young RC, Biggs JT, Ziegler VE, Meyer DA: A rating scale for mania: reliability,  
 2591 validity and sensitivity. *British Journal of Psychiatry* 1978; 133:429-435.  
 2592
