# Supplementary material for: Single-Dose Synthetic Psilocybin With Psychotherapy for Treatment-Resistant Bipolar Type II Major Depressive Episodes: A Nonrandomized Open-Label Trial
Source: PubMed Central journal article supplement — JAMA Psychiatry. 2023 Dec 6;81(6):555–62. doi: 10.1001/jamapsychiatry.2023.4685 (PMC10701666; doi:10.1001/jamapsychiatry.2023.4685), 2023-12-06
Supplement: jamapsychiatry-e234685-s003.pdf [file jamapsychiatry-e234685-s003.pdf]

## Data Sharing Statement

Aaronson. Single-Dose Synthetic Psilocybin With Psychotherapy for Treatment-Resistant Bipolar Type II Major Depressive Episodes. *JAMA Psychiatry*. Published December 06, 2023. doi:10.1001/jamapsychiatry.2023.4685

### Data

**Data available:** Yes

**Data types:** Deidentified participant data

**How to access data:** [audrey.shoultz@sheppardpratt.org](mailto:audrey.shoultz@sheppardpratt.org)

**When available:** With publication

### Supporting Documents

**Document types:** None

### Additional Information

**Who can access the data:** researchers whose proposed use of the data has been approved

**Types of analyses:** for research protocols

**Mechanisms of data availability:** signed data access agreement
